# Supplementary material for: Novel RNA-Seq Signatures Post-Methamphetamine and Oxycodone Use in a Model of HIV-Associated Neurocognitive Disorders
Source: Preprints.org preprint supplement (doi:10.20944/preprints202307.0612.v1), 2023-07-10
Supplement: Supplementary file 1 [file supplementary]

## Sheet: WT+PSU vs. WT
Name	Chromosome	Region	Max group mean	Log₂ fold change	Fold change	P-value	FDR p-value	GeneID	Biotype
LOC100911498	NC_051356.1	complement(68474987..68492500)	6.30805	5.85609	57.924	3.31745e-14	1.93894e-10	100911498	lncRNA		Protein coding	56	90.32
LOC108348108	NC_051355.1	3870765..3873221	116.589	4.93148	30.5156	5.98962e-21	1.05022e-16	108348108	protein_coding		lncRNA	6	9.68
Hspa1b	NC_051355.1	3855104..3859148	32.6299	4.80811	28.0146	9.98481e-18	8.75368e-14	24472	protein_coding		rRNA	0	0
Pdk4	NC_051339.1	complement(33591796..33601798)	1.95559	2.91317	7.53272	1.97296e-06	0.00216212	89813	protein_coding		misc RNA	0	0
Nr4a3	NC_051340.1	62361588..62401489	2.51527	2.59785	6.05383	1.04917e-06	0.00141509	58853	protein_coding			62
Tmem252	NC_051336.1	222316982..222321946	3.43663	2.32075	4.99591	8.87145e-06	0.00723441	361744	protein_coding
Maff	NC_051342.1	110912499..110923851	1.9385	2.26761	4.81526	1.37966e-05	0.0100796	366960	protein_coding
Ckm	NC_051336.1	79061390..79071721	10.6499	2.25065	4.75897	0.000118953	0.0372451	24265	protein_coding
Hspb7	NC_051340.1	153727782..153731268	5.07194	2.18623	4.55115	0.00015689	0.0466256	50565	protein_coding
LOC102551544	NC_051336.1	218792565..218797618	0.508902	2.17887	4.52799	9.67469e-05	0.0321954	102551544	lncRNA
Apold1	NC_051339.1	167768437..167825706	2.81175	2.12366	4.35798	1.64695e-05	0.0111068	444983	protein_coding
Hspb1	NC_051347.1	complement(20794014..20795675)	41.8616	2.06804	4.19317	7.7265e-06	0.00677382	24471	protein_coding
Fos	NC_051341.1	105121170..105124036	10.3748	1.98068	3.94678	4.99507e-05	0.0258638	314322	protein_coding
Fosb	NC_051336.1	complement(78954312..78961492)	8.92715	1.88733	3.69951	5.14631e-06	0.00530797	100360880	protein_coding
Egr4	NC_051339.1	complement(118047869..118050328)	51.6059	1.64155	3.12	9.17735e-05	0.0315521	25129	protein_coding
Fosl2	NC_051341.1	complement(24297898..24319157)	5.82008	1.61327	3.05945	1.8748e-05	0.0118521	25446	protein_coding
Klf4	NC_051340.1	complement(70278843..70283751)	3.72661	1.60111	3.03378	5.96744e-05	0.0260222	114505	protein_coding
Egr2	NC_051355.1	complement(21051270..21056322)	4.4632	1.56007	2.94867	0.000175621	0.0497961	114090	protein_coding
Junb	NC_051354.1	23176265..23178049	68.8332	1.46851	2.76737	5.83747e-05	0.0260222	24517	protein_coding
P2ry1	NC_051337.1	145241975..145248186	4.17961	1.36456	2.57498	6.0848e-05	0.0260222	25265	protein_coding
Kcnj6	NC_051346.1	complement(34061705..34309128)	1.20256	-1.31067	-2.48056	0.000176078	0.0497961	25743	protein_coding
Scube1	NC_051342.1	complement(114759016..114880995)	2.43219	-1.40865	-2.65489	9.73171e-05	0.0321954	315174	protein_coding
Olfm1	NC_051338.1	11520522..11558240	125.036	-1.44673	-2.7259	7.78359e-05	0.0293617	93667	protein_coding
Kcnk4	NC_051336.1	complement(204117941..204129494)	3.73483	-1.54643	-2.92093	5.45775e-05	0.0258638	116489	protein_coding
Aldh3b2	NC_051336.1	201250260..201264699	2.31432	-1.55027	-2.92873	0.000108046	0.0350829	688800	protein_coding
Rasgef1c	NC_051345.1	34227483..34293676	3.95892	-1.56397	-2.95666	6.39462e-05	0.0260752	360519	protein_coding
Tmem178a	NC_051341.1	complement(14004629..14063677)	21.5855	-1.57306	-2.97535	0.000112694	0.0359268	362691	protein_coding
Cck	NC_051343.1	complement(121153499..121160194)	263.005	-1.62389	-3.08205	7.87042e-05	0.0293617	25298	protein_coding
Rtn4rl2	NC_051338.1	complement(69954557..69971108)	9.3902	-1.65049	-3.1394	8.80106e-05	0.0308635	311169	protein_coding
Stpg1	NC_051340.1	147717084..147769792	1.28244	-1.74941	-3.36221	0.000152863	0.0462122	500566	protein_coding
LOC102550768	NC_051337.1	28795167..28849077	0.745459	-1.75475	-3.37467	0.000145089	0.0446313	102550768	lncRNA
Necab3	NC_051338.1	complement(143049477..143064372)	9.66601	-1.80558	-3.49569	6.32344e-05	0.0260752	311562	protein_coding
Adra1d	NC_051338.1	complement(118793356..118809354)	1.56342	-1.80767	-3.50076	5.25408e-05	0.0258638	29413	protein_coding
Fxyd7	NC_051336.1	complement(86277678..86286954)	72.048	-1.81532	-3.51939	8.27533e-05	0.0302291	63848	protein_coding
Slc30a3	NC_051341.1	25264310..25284720	8.70675	-1.93467	-3.82289	1.58665e-06	0.00185469	366568	protein_coding
Bhlhe22	NC_051337.1	100486400..100489510	1.64781	-2.01258	-4.03503	9.07705e-06	0.00723441	365748	protein_coding
LOC102551714	NC_051344.1	113658986..113954869	1.30264	-2.03946	-4.11091	5.41693e-05	0.0258638	102551714	protein_coding
Robo3	NC_051343.1	complement(37133542..37151674)	0.400907	-2.09278	-4.26569	2.58078e-05	0.0144507	315564	protein_coding
Tafa1	NC_051339.1	128738028..129244223	1.75436	-2.21897	-4.6556	8.42739e-08	0.000211094	500266	protein_coding
Pnck	NC_051356.1	complement(151369406..151373508)	19.8865	-2.2414	-4.72857	1.89266e-05	0.0118521	29660	protein_coding
Emx1	NC_051339.1	117725148..117741616	3.21657	-2.26884	-4.81937	1.34673e-06	0.00168668	500235	protein_coding
LOC108348833	NC_051353.1	complement(75937451..75959368)	0.428475	-2.34017	-5.06362	1.61541e-05	0.0111068	108348833	lncRNA
Gml	NC_051342.1	complement(106683749..106712802)	0.169974	-2.46205	-5.51	6.99527e-05	0.0274348	300019	protein_coding
Cyp11b1	NC_051342.1	complement(106772597..106780536)	0.682435	-2.47205	-5.54831	2.11625e-05	0.0127953	500892	protein_coding
Wdr38	NC_051338.1	22750145..22753441	1.26742	-2.47424	-5.55676	5.76209e-05	0.0260222	366035	protein_coding
Kcns1	NC_051338.1	complement(152835642..152843032)	1.87172	-2.54069	-5.81869	2.53398e-08	8.72675e-05	117023	protein_coding
Grp	NC_051353.1	59388679..59402061	3.26018	-2.66476	-6.34122	2.96428e-07	0.000472507	171101	protein_coding
RT1-M6-2	NC_051355.1	1583267..1587099	1.45771	-2.66996	-6.36411	2.30511e-07	0.000404178	365527	protein_coding
Ccdc33	NC_051343.1	complement(58434798..58534338)	0.348934	-2.72629	-6.6175	8.51823e-05	0.0304814	315712	protein_coding
Cort	NC_051340.1	complement(159560591..159562032)	12.7163	-2.77502	-6.84486	5.95994e-06	0.00580565	25305	protein_coding
LOC100361018	NC_051355.1	28333094..28339341	0.294723	-2.93688	-7.65753	5.45618e-05	0.0258638	100361018	protein_coding
Theg	NC_051342.1	10127394..10137556	0.42274	-3.04136	-8.23267	0.000161416	0.0471713	299599	protein_coding
Pomc	NC_051341.1	26939844..26945666	8.95536	-3.08292	-8.47325	6.46623e-06	0.00596731	24664	protein_coding
Ucma	NC_051352.1	complement(73293977..73303728)	4.86734	-3.32405	-10.0147	1.05346e-07	0.000230893	291312	protein_coding
Yjefn3	NC_051351.1	19533742..19539759	4.88509	-3.60014	-12.1269	3.92771e-07	0.000573904	498608	protein_coding
Ttr	NC_051353.1	11941791..11951008	272.061	-3.70298	-13.0229	1.23185e-05	0.00939096	24856	protein_coding
LOC102548561	NC_051342.1	47208656..47220235	0.392612	-3.80107	-13.9391	2.45592e-05	0.0143541	102548561	lncRNA
Gh1	NC_051345.1	complement(91228102..91230079)	1.77981	-3.87488	-14.6709	7.04099e-05	0.0274348	24391	protein_coding
LOC120100089	NC_051336.1	39333714..39367466	0.0461951	-3.8821	-14.7445	2.63729e-05	0.0144507	120100089	lncRNA
Avp	NC_051338.1	complement(117793447..117805091)	4.61402	-4.28644	-19.5141	2.98623e-08	8.72675e-05	24221	protein_coding
Oxt	NC_051338.1	117782650..117783490	44.4846	-4.40943	-21.2506	1.72009e-07	0.000335111	25504	protein_coding
Gp1bb	NC_051346.1	82378216..82379393	17.1739	-6.69865	-103.871	3.86357e-09	1.6936e-05	116727	protein_coding

## Sheet: HIV+PSU vs. HIV
Name	Chromosome	Region	Max group mean	Log₂ fold change	Fold change	P-value	FDR p-value	GeneID	Biotype
Ugt1a2	NC_051344.1	88791216..88808465	0.4538	7.30712	158.366	0.000671594	0.0358154	396527	protein_coding									Ugt1a2
LOC108348108	NC_051355.1	3870765..3873221	146.036	5.42266	42.8926	6.39222e-70	1.17054e-65	108348108	protein_coding									LOC108348108
Hspa1b	NC_051355.1	3855104..3859148	39.9534	4.9932	31.8496	3.89024e-51	3.56191e-47	24472	protein_coding									Hspa1b
Pck1	NC_051338.1	161930256..161936205	0.375449	3.67844	12.8033	0.000437032	0.0268484	362282	protein_coding									Pck1
LOC100361476	NC_051355.1	complement(43755121..43758334)	0.503232	3.45718	10.9829	4.27875e-06	0.000932768	100361476	protein_coding									LOC100361476
Lgsn	NC_051344.1	33416362..33447919	0.156767	3.11085	8.63892	0.000812499	0.039211	316304	protein_coding									Lgsn
Nr4a3	NC_051340.1	62361588..62401489	2.4039	2.81649	7.04449	5.68611e-15	1.15693e-11	58853	protein_coding									Nr4a3
Pdk4	NC_051339.1	complement(33591796..33601798)	1.16955	2.73656	6.66478	4.22913e-08	1.61341e-05	89813	protein_coding									Pdk4
Apold1	NC_051339.1	167768437..167825706	3.67308	2.52359	5.75011	1.47774e-28	9.02014e-25	444983	protein_coding									Apold1
LOC120095555	NC_051346.1	complement(72177750..72185954)	0.0885833	2.20757	4.61897	0.000360505	0.0234227	120095555	lncRNA									LOC120095555
Fos	NC_051341.1	105121170..105124036	12.2952	2.20282	4.60377	5.11741e-15	1.15693e-11	314322	protein_coding									Fos
Ifit3	NC_051336.1	232114166..232119311	4.88634	2.1772	4.52274	3.66923e-12	4.47939e-09	309526	protein_coding									Ifit3
Hspb1	NC_051347.1	complement(20794014..20795675)	59.4798	2.1081	4.31124	5.75977e-11	5.27364e-08	24471	protein_coding									Hspb1
Tent5b	NC_051340.1	145695358..145702668	0.842489	2.06423	4.1821	0.000229084	0.0168473	313019	protein_coding									Tent5b
Tmem252	NC_051336.1	222316982..222321946	3.95089	1.87933	3.67903	2.4281e-09	1.38663e-06	361744	protein_coding									Tmem252
Atf3	NC_051348.1	complement(102751278..102800520)	1.36547	1.80039	3.48315	1.13072e-07	3.98187e-05	25389	protein_coding									Atf3
Maff	NC_051342.1	110912499..110923851	2.14645	1.7772	3.42759	1.21516e-09	7.94716e-07	366960	protein_coding									Maff
Gabrg3	NC_051336.1	complement(107627450..108247483)	0.433783	1.75168	3.36749	0.00113493	0.0493655	79211	protein_coding									Gabrg3
Dusp1	NC_051345.1	16680489..16683276	33.1787	1.7475	3.35775	4.20781e-16	1.28422e-12	114856	protein_coding									Dusp1
LOC684871	NC_051351.1	67595762..67597055	3.56784	1.71346	3.27947	5.30827e-09	2.55803e-06	684871	protein_coding									LOC684871
Cebpb	NC_051338.1	156398035..156399466	4.41973	1.68847	3.22315	3.05085e-10	2.66034e-07	24253	protein_coding									Cebpb
Prok2	NC_051339.1	complement(132346681..132361754)	0.56215	1.58264	2.99518	4.42675e-05	0.00558756	192206	protein_coding									Prok2
Ptar1	NC_051336.1	221283306..221326861	0.642736	1.54475	2.91754	0.000678678	0.0358154	286972	protein_coding									Ptar1
Ccn1	NC_051337.1	complement(234562410..234565370)	2.98612	1.53071	2.88928	1.60328e-08	6.67258e-06	83476	protein_coding									Ccn1
Fosl2	NC_051341.1	complement(24297898..24319157)	6.45884	1.53048	2.88882	1.15371e-17	4.22534e-14	25446	protein_coding									Fosl2
Nr4a1	NC_051342.1	132368399..132389300	47.1516	1.52352	2.87492	6.06017e-18	2.77435e-14	79240	protein_coding									Nr4a1
Egr4	NC_051339.1	complement(118047869..118050328)	64.5969	1.49198	2.81275	4.77731e-14	7.95291e-11	25129	protein_coding									Egr4
Klf2	NC_051351.1	complement(17521773..17523723)	19.0184	1.48874	2.80644	3.37099e-10	2.80589e-07	306330	protein_coding									Klf2
Fosb	NC_051336.1	complement(78954312..78961492)	7.7865	1.48052	2.79049	2.29108e-09	1.35336e-06	100360880	protein_coding									Fosb
Inhba	NC_051352.1	complement(49091635..49111573)	2.70612	1.46478	2.76022	1.13314e-06	0.000300727	29200	protein_coding									Inhba
Junb	NC_051354.1	23176265..23178049	96.6214	1.46374	2.75823	4.98054e-16	1.30291e-12	24517	protein_coding									Junb
Sprr1a	NC_051337.1	complement(178055096..178057012)	2.62735	1.4399	2.71303	0.000212518	0.0162152	499660	protein_coding									Sprr1a
Sertad3	NC_051336.1	82763535..82767271	1.24948	1.42561	2.68628	4.95684e-05	0.00597636	499108	protein_coding									Sertad3
P2ry1	NC_051337.1	145241975..145248186	3.45177	1.39365	2.62743	2.18351e-06	0.000526112	25265	protein_coding									P2ry1
Foxf1	NC_051354.1	49153729..49157741	1.00031	1.38701	2.61537	0.000124961	0.0112171	687536	protein_coding									Foxf1
LOC102551544	NC_051336.1	218792565..218797618	0.602849	1.38298	2.60807	0.000676358	0.0358154	102551544	lncRNA									LOC102551544
LOC120099695	NW_023637831.1	81687..83558	46.8252	1.37779	2.59869	0.000429571	0.0266523	120099695	rRNA									LOC120099695
LOC100362783	NC_051347.1	complement(18930608..18936787)	1.76966	1.36323	2.5726	0.000785536	0.038565	100362783	protein_coding									LOC100362783
Dnajb1	NC_051354.1	complement(24522717..24526458)	47.5521	1.35963	2.5662	9.81759e-12	1.05753e-08	361384	protein_coding									Dnajb1
LOC120102105	NC_051338.1	2231807..2233678	45.3011	1.35278	2.55404	0.000572465	0.0314804	120102105	rRNA									LOC120102105
Rel	NC_051349.1	complement(97690105..97721194)	1.07648	1.35036	2.54975	8.11592e-07	0.000230764	305584	protein_coding									Rel
Ccdc117	NC_051349.1	complement(80399236..80409824)	6.32161	1.34775	2.54516	3.58084e-10	2.85097e-07	498404	protein_coding									Ccdc117
Zfp189	NC_051340.1	63872596..63884348	6.66619	1.31691	2.49131	7.57118e-14	1.15536e-10	313219	protein_coding									Zfp189
Egr2	NC_051355.1	complement(21051270..21056322)	4.71477	1.26625	2.40536	5.03596e-09	2.55803e-06	114090	protein_coding									Egr2
Per2	NC_051344.1	complement(92007289..92049551)	6.29706	1.25585	2.38808	9.53207e-10	6.81283e-07	63840	protein_coding									Per2
Lyve1	NC_051336.1	complement(164962872..164976309)	1.32897	1.22911	2.34423	3.64964e-05	0.00480807	293186	protein_coding									Lyve1
Htr1b	NC_051343.1	complement(82513572..82534892)	6.86949	1.22844	2.34314	3.98014e-11	3.83601e-08	25075	protein_coding									Htr1b
Fmo2	NC_051348.1	complement(75221149..75244377)	0.789373	1.22558	2.33849	5.94732e-05	0.00680671	246245	protein_coding									Fmo2
Npas4	NC_051336.1	complement(202281260..202298681)	3.80823	1.22536	2.33814	1.02868e-09	6.97676e-07	266734	protein_coding									Npas4
Sp9	NC_051338.1	58146826..58149357	4.66903	1.20379	2.30345	0.000127901	0.0113146	366078	protein_coding									Sp9
Ddit4	NC_051355.1	complement(27891989..27894088)	59.1763	1.19139	2.28373	5.60454e-12	6.4144e-09	140942	protein_coding									Ddit4
Ism1	NC_051338.1	127023322..127102228	7.79738	1.17414	2.25658	7.61916e-10	5.81342e-07	311760	protein_coding									Ism1
Klf4	NC_051340.1	complement(70278843..70283751)	3.30655	1.1673	2.24591	2.12569e-06	0.000519008	114505	protein_coding									Klf4
Klk7	NC_051336.1	94267170..94271332	1.70455	1.16454	2.24162	0.00084022	0.0400454	292852	protein_coding									Klk7
Arc	NC_051342.1	complement(106555968..106559697)	74.3105	1.15472	2.22641	1.18181e-12	1.54581e-09	54323	protein_coding									Arc
Tent5a	NC_051343.1	complement(86222294..86229045)	0.785277	1.15322	2.22409	6.00915e-05	0.00683475	300870	protein_coding									Tent5a
Plat	NC_051351.1	complement(69240582..69265177)	35.5744	1.15054	2.21998	8.66622e-13	1.22074e-09	25692	protein_coding									Plat
Cdc42ep3	NC_051341.1	15710894..15731366	13.027	1.14908	2.21773	9.45979e-09	4.22507e-06	313838	protein_coding									Cdc42ep3
Chordc1	NC_051343.1	15374356..15398436	14.7689	1.14081	2.20504	9.64281e-07	0.000263551	315447	protein_coding									Chordc1
Cbr3	NC_051346.1	33008615..33016877	27.4668	1.13666	2.19871	3.38994e-08	1.32078e-05	304078	protein_coding									Cbr3
Bag3	NC_051336.1	183103038..183126862	17.5305	1.11884	2.17172	8.42484e-06	0.00155834	293524	protein_coding									Bag3
Klf5	NC_051350.1	76060320..76079445	3.77968	1.11435	2.16498	4.78628e-06	0.00103113	84410	protein_coding									Klf5
Rgs2	NC_051348.1	complement(55799749..55802354)	72.0871	1.0977	2.14013	2.49885e-09	1.38663e-06	84583	protein_coding									Rgs2
Hmox1	NC_051354.1	13466287..13474082	5.44712	1.0963	2.13806	7.35261e-05	0.00759314	24451	protein_coding									Hmox1
Mctp1	NC_051337.1	6071408..6761833	11.6091	1.08271	2.11801	2.31506e-08	9.42076e-06	309928	protein_coding									Mctp1
Pten	NC_051336.1	230631303..230696754	10.515	1.0706	2.1003	5.76557e-06	0.00119048	50557	protein_coding									Pten
Tiparp	NC_051337.1	149753682..149780327	5.29473	1.06279	2.08896	1.39349e-08	5.93433e-06	310467	protein_coding									Tiparp
Ciart	NC_051337.1	complement(183419819..183424845)	7.6635	1.06121	2.08668	6.67137e-09	3.05415e-06	365871	protein_coding									Ciart
Btbd8	NC_051349.1	complement(2265189..2338426)	10.6846	1.05642	2.07976	1.44264e-09	8.80585e-07	100364240	protein_coding									Btbd8
Btg2	NC_051348.1	complement(45531881..45535642)	6.55503	1.05026	2.07091	6.37817e-05	0.00705584	29619	protein_coding									Btg2
Cry1	NC_051342.1	18529823..18594092	7.50366	1.04819	2.06793	3.45376e-07	0.000109044	299691	protein_coding									Cry1
Gpr63	NC_051340.1	38672548..38727224	1.79146	1.04508	2.06349	1.4844e-05	0.00254041	297952	protein_coding									Gpr63
Rem2	NC_051350.1	27933950..27938429	37.5988	1.03321	2.04657	6.10045e-06	0.00121951	64626	protein_coding									Rem2
Gem	NC_051340.1	25214309..25225222	2.4972	1.03087	2.04326	0.000866785	0.0408939	297902	protein_coding									Gem
Nfkbia	NC_051341.1	complement(72858713..72861941)	18.6665	1.02645	2.037	1.75352e-06	0.00044598	25493	protein_coding									Nfkbia
Swt1	NC_051348.1	complement(63452494..63509982)	1.675	1.02063	2.0288	2.85849e-05	0.00412163	289088	protein_coding									Swt1
Fst	NC_051337.1	complement(46123260..46130584)	2.0104	1.00512	2.00711	4.27054e-05	0.00546868	24373	protein_coding									Fst
Naa16	NC_051350.1	complement(54711620..54770915)	3.87911	0.997563	1.99662	4.8158e-05	0.00591859	686240	protein_coding									Naa16
Cst6	NC_051336.1	complement(202655322..202657030)	11.5163	-0.998424	-1.99782	0.000542555	0.0302722	171096	protein_coding
Npas1	NC_051336.1	complement(77167375..77187887)	2.54761	-1.00696	-2.00968	0.000525579	0.0298383	308387	protein_coding
Fabp3	NC_051340.1	142651962..142658707	62.7757	-1.00803	-2.01116	1.78133e-06	0.000446846	79131	protein_coding
Trpv2	NC_051345.1	47265524..47294263	3.02488	-1.01933	-2.02698	6.62931e-05	0.00718319	29465	protein_coding
LOC120099863	NC_051336.1	132800647..132808007	1.11977	-1.02424	-2.03388	3.5874e-05	0.00478199	120099863	lncRNA
Ngb	NC_051341.1	complement(106744378..106749830)	3.10157	-1.02498	-2.03493	0.000676708	0.0358154	85382	protein_coding
Sertm1	NC_051337.1	complement(139086905..139106528)	3.35304	-1.033	-2.04628	0.000389719	0.024866	690333	protein_coding
Alas2	NC_051356.1	19463146..19486526	2.13323	-1.03725	-2.05231	0.000537928	0.030124	25748	protein_coding
Pnoc	NC_051350.1	complement(39624635..39652463)	4.95049	-1.04206	-2.05917	6.44063e-05	0.00706233	25516	protein_coding
Cd33	NC_051336.1	complement(93935418..93940452)	2.20561	-1.04255	-2.05987	7.90644e-05	0.0079551	690492	protein_coding
Stx1a	NC_051347.1	complement(21641971..21670022)	40.5386	-1.04396	-2.06188	0.000686504	0.0360208	116470	protein_coding
Adra2a	NC_051336.1	253061480..253064280	2.74734	-1.04566	-2.06431	0.000713756	0.0365815	25083	protein_coding
Frzb	NC_051338.1	complement(65332274..65365208)	1.38688	-1.04636	-2.06532	0.000602292	0.0328249	295691	protein_coding
Atp2b4	NC_051348.1	complement(45156137..45255292)	9.3222	-1.05165	-2.0729	0.000135701	0.0118898	29600	protein_coding
Cmklr1	NC_051347.1	42974462..43027321	0.254769	-1.06433	-2.0912	0.00109322	0.0480152	60669	protein_coding
Lypd6b	NC_051338.1	34199101..34360770	0.982364	-1.06451	-2.09147	0.000471322	0.0281135	362133	protein_coding
Cbln1	NC_051354.1	19608763..19612572	5.89932	-1.06994	-2.09935	0.000511392	0.0295414	498922	protein_coding
Slc25a18	NC_051339.1	154000808..154021373	12.8694	-1.07067	-2.1004	4.68363e-09	2.52255e-06	681896	protein_coding
Myo16	NC_051351.1	complement(78884405..79364445)	1.35496	-1.07789	-2.11095	0.000233137	0.0168814	192253	protein_coding
Fam83h	NC_051342.1	complement(107716431..107724619)	0.719865	-1.08208	-2.11708	0.000739363	0.0372176	362937	protein_coding
Baiap3	NC_051345.1	complement(14260269..14273019)	2.27418	-1.09346	-2.13385	0.000360703	0.0234227	106146145	protein_coding
Adcy8	NC_051342.1	complement(96417310..96665911)	1.50942	-1.1048	-2.15069	0.000183137	0.0146988	29241	protein_coding
Rsph9	NC_051344.1	14839565..14860062	4.62306	-1.10707	-2.15408	7.20262e-05	0.00753683	316238	protein_coding
Kcnc4	NC_051337.1	complement(195063967..195099233)	1.63142	-1.11377	-2.16411	0.000116899	0.0107571	684516	protein_coding
Chrna4	NC_051338.1	complement(168136246..168157839)	2.90272	-1.14045	-2.20449	6.49981e-05	0.00708479	25590	protein_coding
Slc6a13	NC_051339.1	154539246..154577784	1.97077	-1.14111	-2.20551	0.000678259	0.0358154	171163	protein_coding
Camk2n2	NC_051346.1	80289702..80290829	12.6089	-1.14342	-2.20904	0.000381581	0.0245176	59314	protein_coding
Zfp853	NC_051347.1	11266124..11276492	0.639508	-1.14382	-2.20966	6.97381e-05	0.00746809	102555274	protein_coding
Wnt4	NC_051340.1	149513573..149535415	1.78388	-1.15025	-2.21952	3.78856e-05	0.00492029	84426	protein_coding
Tlr2	NC_051337.1	complement(169200620..169206819)	0.754362	-1.15725	-2.23032	0.000699262	0.0362745	310553	protein_coding
Zdhhc22	NC_051341.1	complement(106629090..106646996)	5.99806	-1.16292	-2.2391	2.77457e-05	0.00406463	299211	protein_coding
Lrfn2	NC_051344.1	complement(11897425..12066177)	2.66756	-1.16426	-2.24118	7.07455e-05	0.00753193	316205	protein_coding
Col23a1	NC_051345.1	35549090..35839152	1.3888	-1.16969	-2.24964	0.000423135	0.0263553	353303	protein_coding
Pstpip1	NC_051343.1	56499287..56538593	0.671864	-1.17646	-2.26021	0.000487991	0.0287275	300732	protein_coding
Trpc6	NC_051343.1	5759387..5864000	1.18065	-1.17646	-2.26022	0.000660009	0.0353394	89823	protein_coding
Nppa	NC_051340.1	158429042..158430351	5.36258	-1.19286	-2.28605	0.000116841	0.0107571	24602	protein_coding
Adgra1	NC_051336.1	194629744..194673254	4.47028	-1.19299	-2.28626	4.45491e-05	0.00558756	309097	protein_coding
Nectin1	NC_051343.1	44101776..44164863	5.69116	-1.2107	-2.31451	1.02077e-05	0.00183258	192183	protein_coding
Igf2	NC_051336.1	complement(197814409..197831802)	7.09229	-1.22248	-2.33348	8.43202e-05	0.00834633	24483	protein_coding
Stpg1	NC_051340.1	147717084..147769792	1.25951	-1.23557	-2.35475	0.000105796	0.0099863	500566	protein_coding
Cyp27a1	NC_051344.1	76264655..76294551	1.53439	-1.2365	-2.35625	3.01883e-05	0.00430674	301517	protein_coding
LOC120100845	NC_051337.1	complement(158143645..158146366)	2.13688	-1.24075	-2.36321	0.000452729	0.0274043	120100845	lncRNA
Rtn4rl2	NC_051338.1	complement(69954557..69971108)	10.295	-1.24518	-2.37049	0.000968065	0.0440975	311169	protein_coding
Sox18	NC_051338.1	complement(168785488..168787290)	7.05452	-1.25455	-2.38592	5.55953e-07	0.000164204	311723	protein_coding
Nrp2	NC_051344.1	64122815..64238007	1.49594	-1.28789	-2.4417	7.22393e-07	0.000209976	81527	protein_coding
Tmie	NC_051343.1	complement(110849713..110864803)	1.66342	-1.31036	-2.48004	9.38497e-06	0.00170156	501061	protein_coding
Nptxr	NC_051342.1	complement(111336660..111354737)	96.0311	-1.33436	-2.52164	0.000415155	0.0262543	81005	protein_coding
Matn2	NC_051342.1	65494996..65644613	1.42695	-1.34478	-2.53991	0.000421818	0.0263553	299996	protein_coding
Kcnj16	NC_051345.1	95990009..96021356	2.41724	-1.34896	-2.54728	1.00183e-07	3.59714e-05	29719	protein_coding
Gipc3	NC_051342.1	8374941..8383281	0.312024	-1.36847	-2.58196	0.000726565	0.0369579	500789	protein_coding
Col6a3	NC_051344.1	complement(91361578..91439434)	0.17391	-1.37307	-2.5902	8.66949e-05	0.00848961	367313	protein_coding
Catsperg	NC_051336.1	complement(84488728..84519495)	0.400785	-1.37458	-2.59293	0.00022133	0.0166106	292767	protein_coding
Wnt9b	NC_051345.1	complement(88635330..88657035)	0.208532	-1.37959	-2.60195	0.000226943	0.0168473	303586	protein_coding
Ankfn1	NC_051345.1	complement(74214143..74602825)	0.144462	-1.38115	-2.60475	0.00049043	0.0287275	102551403	protein_coding
Hcrtr1	NC_051340.1	complement(142477214..142486674)	0.73014	-1.39226	-2.62489	0.00055158	0.0305152	25593	protein_coding
Crhr2	NC_051339.1	complement(84222897..84265924)	0.455646	-1.39401	-2.62809	0.000732144	0.0371385	64680	protein_coding
Des	NC_051344.1	76850979..76858695	9.63184	-1.39627	-2.6322	0.000235495	0.0168814	64362	protein_coding
Zap70	NC_051344.1	38989750..39011701	0.976317	-1.39703	-2.63359	0.000119125	0.0108892	301348	protein_coding
LOC120096642	NC_051349.1	76769868..76776620	0.35119	-1.39832	-2.63595	4.38863e-05	0.00558088	120096642	lncRNA
Ranbp3l	NC_051337.1	58057887..58113158	0.710119	-1.40014	-2.63927	5.42909e-05	0.00629599	294789	protein_coding
Rasgrf2	NC_051337.1	complement(23113613..23361537)	1.97536	-1.40416	-2.64663	3.56035e-05	0.00478199	114513	protein_coding
Col1a2	NC_051339.1	32563938..32598868	3.90015	-1.4159	-2.66826	1.8989e-05	0.00310471	84352	protein_coding
Thbs2	NC_051336.1	complement(55670394..55699789)	0.30978	-1.44643	-2.72533	0.000175131	0.014317	292406	protein_coding
Pln	NC_051355.1	32629537..32639559	8.44833	-1.44861	-2.72945	0.000898757	0.0417717	64672	protein_coding
Col1a1	NC_051345.1	79883622..79900625	3.16826	-1.4721	-2.77425	1.21547e-06	0.000317968	29393	protein_coding
LOC102549608	NC_051336.1	complement(50934184..50953773)	0.16918	-1.48287	-2.79503	0.000817521	0.039211	102549608	lncRNA
Pomc	NC_051341.1	26939844..26945666	3.28292	-1.49455	-2.81776	0.000277996	0.018995	24664	protein_coding
Tp53i11	NC_051338.1	79144824..79160056	17.5939	-1.50329	-2.83489	3.29555e-08	1.31192e-05	311209	protein_coding
Ptpn3	NC_051340.1	complement(71908520..72027323)	1.45919	-1.505	-2.83825	0.000170976	0.014167	362524	protein_coding
Gzmm	NC_051342.1	complement(10011065..10016841)	2.6169	-1.5055	-2.83923	4.88708e-05	0.00596615	29252	protein_coding
Col3a1	NC_051344.1	47374611..47410547	3.78959	-1.50677	-2.84172	1.54252e-05	0.00261543	84032	protein_coding
Vip	NC_051336.1	42064878..42073219	4.32277	-1.51078	-2.84965	0.000937668	0.0431176	117064	protein_coding
Rasgef1c	NC_051345.1	34227483..34293676	4.94498	-1.53116	-2.89018	0.000243046	0.0172272	360519	protein_coding
Lnp1	NC_051346.1	43660873..43678727	3.26837	-1.53468	-2.89723	0.000166887	0.0138911	100359918	protein_coding
Slc6a7	NC_051353.1	complement(54448464..54467319)	6.95137	-1.54629	-2.92066	4.96774e-06	0.00105475	117100	protein_coding
Grem1	NC_051338.1	complement(100512317..100524001)	0.550893	-1.56951	-2.96804	0.00043227	0.0266523	50566	protein_coding
Fam180a	NC_051339.1	complement(63992867..64008047)	0.764122	-1.57552	-2.98043	0.00100745	0.0454393	362336	protein_coding
Scn5a	NC_051343.1	complement(119220905..119318816)	0.589004	-1.57706	-2.98361	3.92789e-07	0.000117914	25665	protein_coding
Vwa5b1	NC_051340.1	complement(150792959..150864849)	0.248065	-1.60388	-3.03959	1.11552e-06	0.000300403	313653	protein_coding
Gimap7	NC_051339.1	77670522..77674692	1.35816	-1.61143	-3.05555	2.22549e-05	0.00352754	500113	protein_coding
Calb2	NC_051354.1	complement(38114435..38141438)	13.4209	-1.6243	-3.08292	9.17554e-15	1.68023e-11	117059	protein_coding
Pnck	NC_051356.1	complement(151369406..151373508)	18.4771	-1.62579	-3.0861	1.31042e-09	8.27464e-07	29660	protein_coding
Gimap9	NC_051339.1	77626553..77629386	0.887022	-1.63027	-3.0957	0.000121012	0.0109306	493865	protein_coding
Sstr3	NC_051342.1	complement(110092563..110109043)	0.739735	-1.63489	-3.10565	0.000277129	0.018995	171044	protein_coding
Scube1	NC_051342.1	complement(114759016..114880995)	3.03041	-1.64426	-3.12588	0.000257653	0.0180082	315174	protein_coding
LOC120096632	NC_051349.1	complement(72062467..72124747)	0.166159	-1.64683	-3.13144	0.000165434	0.013833	120096632	lncRNA
LOC100911864	NC_051336.1	165274998..165281034	0.602485	-1.64853	-3.13513	0.000460797	0.0275988	100911864	lncRNA
Tmem270	NC_051347.1	21793631..21798723	2.2124	-1.65665	-3.15284	4.6025e-05	0.00569879	288604	protein_coding
Fmod	NC_051348.1	45493517..45504134	2.6234	-1.65801	-3.1558	5.01112e-06	0.00105475	64507	protein_coding
Gstm2	NC_051337.1	complement(195624015..195628774)	6.74466	-1.6594	-3.15886	3.70836e-05	0.00485053	24424	protein_coding
Ttc22	NC_051340.1	121401973..121423130	1.04961	-1.66459	-3.17024	0.000142018	0.0123839	298300	protein_coding
Igfbp2	NC_051344.1	74415574..74442945	16.7287	-1.67299	-3.18875	7.17634e-05	0.00753683	25662	protein_coding
Slc13a4	NC_051339.1	complement(63943369..63988852)	3.49826	-1.69121	-3.22927	4.06849e-06	0.000897616	503568	protein_coding
Adamts2	NC_051345.1	34920996..35126465	0.511579	-1.69218	-3.23145	7.0544e-06	0.00133773	287899	protein_coding
Irs4	NC_051356.1	complement(105344016..105359985)	0.200815	-1.69347	-3.23434	0.000712022	0.0365815	315350	protein_coding
Myl3	NC_051343.1	110738669..110744814	34.1164	-1.71091	-3.27367	0.000377773	0.0243584	24585	protein_coding
Alox15	NC_051345.1	complement(55060169..55068885)	0.67286	-1.71498	-3.28292	3.60372e-05	0.00478199	81639	protein_coding
Tnnt2	NC_051348.1	47267325..47285390	55.3021	-1.71743	-3.2885	0.000221116	0.0166106	24837	protein_coding
Ccdc33	NC_051343.1	complement(58434798..58534338)	0.261447	-1.73823	-3.33627	0.000445138	0.0271712	315712	protein_coding
LOC102548530	NC_051351.1	complement(76303773..76307949)	0.709223	-1.75238	-3.36915	5.30395e-05	0.00626619	102548530	lncRNA
Bfsp1	NC_051338.1	complement(131195087..131252668)	0.444041	-1.7554	-3.3762	2.7305e-05	0.00406463	25394	protein_coding
Myh6	NC_051350.1	complement(28418120..28442316)	13.5846	-1.76604	-3.4012	3.03391e-05	0.00430674	29556	protein_coding
LOC102547162	NC_051346.1	68249132..68272391	0.168802	-1.77838	-3.43041	0.000415778	0.0262543	102547162	lncRNA
LOC120093065	NC_051336.1	complement(158243696..158245091)	19.851	-1.79398	-3.46769	0.00079376	0.0388645	120093065	protein_coding
Myl2	NC_051347.1	complement(34454223..34468554)	62.3566	-1.80756	-3.50051	0.000291114	0.0195988	363925	protein_coding
Fat2	NC_051345.1	complement(39364072..39456324)	0.0626355	-1.81814	-3.52627	0.000520027	0.0298383	65048	protein_coding
Thpo	NC_051346.1	80182590..80188927	0.71743	-1.82171	-3.535	7.35316e-05	0.00759314	81811	protein_coding
Ano2	NC_051339.1	158514200..158855639	0.437355	-1.82495	-3.54294	0.000647789	0.0349921	100361584	protein_coding
Ptgds	NC_051338.1	complement(8281899..8284833)	932.87	-1.84744	-3.59861	1.9388e-06	0.000479775	25526	protein_coding
Csrp3	NC_051336.1	complement(98528067..98546647)	2.64057	-1.86807	-3.65044	0.00089465	0.0416866	117505	protein_coding
Gabrq	NC_051356.1	150696174..150712950	0.26692	-1.88581	-3.69561	1.04274e-05	0.00184484	65187	protein_coding
Srpk3	NC_051356.1	151510452..151515208	1.57555	-1.88944	-3.70491	3.78258e-06	0.000855144	293854	protein_coding
Bhlhe22	NC_051337.1	100486400..100489510	2.94804	-1.92557	-3.79886	0.00101282	0.0455696	365748	protein_coding
Tnnc1	NC_051351.1	6400801..6405419	27.9572	-1.93148	-3.81447	2.76084e-05	0.00406463	290561	protein_coding
Actc1	NC_051338.1	complement(100811987..100817523)	41.3594	-1.94194	-3.84222	5.73899e-05	0.00660959	29275	protein_coding
Slc17a6	NC_051336.1	101212489..101252543	1.68359	-1.95709	-3.88277	5.27605e-09	2.55803e-06	84487	protein_coding
Cox6a2	NC_051336.1	complement(182788528..182790746)	22.3067	-1.97223	-3.92373	0.000600229	0.0328102	25278	protein_coding
Slc30a3	NC_051341.1	25264310..25284720	13.5918	-1.99214	-3.97826	0.000196852	0.015452	366568	protein_coding
LOC108348833	NC_051353.1	complement(75937451..75959368)	0.452487	-2.03553	-4.09972	1.16894e-05	0.0020194	108348833	lncRNA
Pgam2	NC_051349.1	complement(80681796..80683907)	4.77268	-2.05354	-4.15123	0.00030059	0.0200891	24959	protein_coding
LOC120098113	NC_051353.1	complement(55097848..55118810)	1.16498	-2.05441	-4.15373	8.53168e-08	3.12464e-05	120098113	lncRNA
LOC102555052	NC_051341.1	complement(127527181..127572823)	0.0479002	-2.06321	-4.17914	0.000347433	0.0228829	102555052	lncRNA
LOC102547851	NC_051345.1	complement(56558555..56622104)	0.0625682	-2.16043	-4.47047	0.000517598	0.0298058	102547851	lncRNA
Mybpc1	NC_051342.1	complement(22930350..23015981)	0.241773	-2.17278	-4.50892	0.00053261	0.0301023	362867	protein_coding
Mb	NC_051342.1	complement(108759903..108767134)	69.8385	-2.17284	-4.5091	3.17488e-05	0.00442544	59108	protein_coding
Bcl3	NC_051336.1	complement(79471368..79485908)	0.481823	-2.1753	-4.51681	7.13507e-05	0.00753683	680611	protein_coding
Pah	NC_051342.1	21933179..21998134	0.387366	-2.19692	-4.585	9.32878e-05	0.00903855	24616	protein_coding
Cox8b	NC_051336.1	complement(195977183..195978643)	9.3656	-2.20192	-4.60092	0.000351627	0.0229964	25250	protein_coding
Tafa1	NC_051339.1	128738028..129244223	3.00934	-2.26149	-4.79487	0.000126449	0.0112405	500266	protein_coding
Slc9a2	NC_051344.1	42932001..43014447	0.640458	-2.26539	-4.80785	1.83937e-05	0.00303446	24783	protein_coding
RGD1309028	NC_051341.1	122465373..122471397	0.5226	-2.26665	-4.81204	7.74278e-05	0.00792099	299265	protein_coding
Cpxm2	NC_051336.1	complement(186836797..186947222)	0.650875	-2.26991	-4.82293	4.24494e-05	0.00546868	293566	protein_coding
LOC120099103	NC_051336.1	complement(36090447..36107414)	0.105041	-2.34213	-5.07051	0.000887344	0.0415577	120099103	lncRNA
Aplnr	NC_051338.1	70217407..70221052	0.445247	-2.39566	-5.26219	2.5834e-07	8.44771e-05	83518	protein_coding
Ntf3	NC_051339.1	complement(158914984..158984453)	0.468073	-2.39784	-5.27015	0.00112378	0.0490913	81737	protein_coding
Abi3bp	NC_051346.1	complement(43912187..44128888)	0.239455	-2.39881	-5.27367	3.23214e-05	0.00445014	363767	protein_coding
Trim54	NC_051341.1	complement(25239340..25258511)	8.00339	-2.43314	-5.40069	9.67309e-10	6.81283e-07	362708	protein_coding
Uncx	NC_051347.1	complement(15092779..15097300)	0.216438	-2.49284	-5.62885	0.000421711	0.0263553	29375	protein_coding
LOC501491	NC_051355.1	complement(43755510..43756937)	1.09308	-2.50802	-5.68838	0.000161254	0.0136708	501491	protein_coding
Lbhd2	NC_051341.1	130442388..130447229	1.0986	-2.51172	-5.703	5.39836e-05	0.00629599	500724	protein_coding
Tmem275	NC_051340.1	129376468..129379282	0.278468	-2.53446	-5.79359	6.96369e-05	0.00746809	120103172	protein_coding
Slc22a6	NC_051336.1	205522579..205531179	1.48258	-2.58381	-5.99523	5.86828e-06	0.001194	29509	protein_coding
Trhr	NC_051342.1	75348672..75393310	0.664419	-2.66656	-6.34911	5.13888e-09	2.55803e-06	25570	protein_coding
Shox2	NC_051337.1	complement(151217049..151227180)	0.573214	-2.786	-6.89714	6.16751e-05	0.00694193	25546	protein_coding
Wnt6	NC_051344.1	76329882..76343523	0.460082	-2.85778	-7.24901	0.000409098	0.0260118	316526	protein_coding
LOC120100906	NC_051337.1	complement(192862767..192868972)	0.164267	-2.9352	-7.6486	0.000158572	0.0135059	120100906	lncRNA
Cxcl13	NC_051349.1	complement(13608894..13613965)	0.54594	-2.99731	-7.98508	0.000183815	0.0146988	498335	protein_coding
Kcnj13	NC_051344.1	complement(88063003..88071112)	0.438327	-3.09415	-8.53946	0.000432029	0.0266523	94341	protein_coding
Actg2	NC_051339.1	complement(116021832..116046475)	2.85145	-3.10997	-8.63362	8.23281e-05	0.00819344	25365	protein_coding
Pmch	NC_051342.1	22511934..22513250	10.9721	-3.76685	-13.6124	1.61856e-11	1.64662e-08	24659	protein_coding
LOC102555697	NC_051339.1	133577659..133647925	0.0451975	-4.15856	-17.8588	0.000303251	0.0201932	102555697	lncRNA
Gh1	NC_051345.1	complement(91228102..91230079)	3.61339	-4.49303	-22.5183	6.04116e-09	2.83656e-06	24391	protein_coding
Prdm6	NC_051353.1	46904115..47008482	0.219811	-5.6211	-49.2175	2.62096e-05	0.00399958	307305	protein_coding
Prl	NC_051352.1	complement(37859999..37870062)	1.04555	-7.12296	-139.388	0.000757124	0.0379368	24683	protein_coding

## Sheet: HIV+PSU vs. WT+PSU
Name	Chromosome	Region	Max group mean	Log₂ fold change	Fold change	P-value	FDR p-value	GeneID	Biotype
Fgg	NC_051337.1	168354880..168362325	0.190452	3.80167	13.9449	0.000902211	0.019738	24367	protein_coding
Rpl39l	NC_051345.1	complement(5455712..5459828)	0.578183	2.80458	6.98653	0.0018313	0.0326988	497860	protein_coding
Nxf3	NC_051356.1	complement(99025901..99050409)	0.213209	2.33054	5.02992	0.000189623	0.00623239	302591	protein_coding
LOC103690996	NC_051347.1	complement(6072279..6072780)	64.4864	2.19851	4.59005	0.000547708	0.013597	103690996	protein_coding
Cd200r1	NC_051346.1	complement(55886937..55921217)	0.232247	2.11093	4.31968	0.00180636	0.032354	64357	protein_coding
LOC102555727	NC_051339.1	13198243..13199451	0.412228	2.11026	4.31769	0.00131021	0.0260367	102555727	protein_coding
LOC108351377	NC_051341.1	129733876..129734339	7.79858	2.02113	4.05902	0.00134289	0.026429	108351377	protein_coding
LOC103691423	NC_051337.1	complement(24883845..24884266)	1.31875	1.98591	3.96112	0.00111361	0.023173	103691423	protein_coding
LOC102551714	NC_051344.1	113658986..113954869	1.18238	1.83552	3.569	2.42329e-12	1.5609e-09	102551714	protein_coding
Phox2a	NC_051336.1	156178754..156183118	0.514085	1.72131	3.29736	0.000640863	0.0153001	116648	protein_coding
Col6a5	NC_051343.1	complement(106483806..106584114)	0.160875	1.68626	3.21821	0.00222955	0.0370633	501047	protein_coding
Yjefn3	NC_051351.1	19533742..19539759	1.41239	1.62871	3.09237	0.00255706	0.0405924	498608	protein_coding
Rn7sl1	NC_051341.1	87636808..87637106	37.1635	1.62244	3.07895	0.00010544	0.00406218	102723236	SRP_RNA
LOC120099865	NC_051336.1	133428758..133429123	16.3111	1.61599	3.06522	0.000546929	0.013597	120099865	protein_coding
LOC108349234	NC_051336.1	complement(121251718..121271532)	0.180863	1.6024	3.03648	0.00247436	0.0398606	108349234	lncRNA
Plg	NC_051336.1	complement(48325186..48367643)	0.264132	1.57886	2.98734	0.00216478	0.036343	85253	protein_coding
Oxt	NC_051338.1	117782650..117783490	7.23275	1.50101	2.83042	0.000727078	0.0167989	25504	protein_coding
Avp	NC_051338.1	complement(117793447..117805091)	0.801239	1.49813	2.82476	2.83673e-05	0.00154977	24221	protein_coding
Luzp4	NC_051356.1	111280490..111321363	0.32333	1.44796	2.72823	0.00305648	0.0457632	367753	protein_coding
LOC100911357	NC_051354.1	complement(33507454..33523068)	0.714731	1.42663	2.68817	0.00134902	0.0265087	100911357	protein_coding
Cfap126	NC_051348.1	83526657..83542552	3.19242	1.41275	2.66243	1.86804e-07	2.79949e-05	498278	protein_coding
RGD1565611	NC_051345.1	60872529..60876191	1.37254	1.40136	2.64151	0.000505454	0.0127811	497957	protein_coding
LOC120099253	NC_051356.1	152340511..152342671	1.42196	1.38513	2.61195	0.000112157	0.00425078	120099253	protein_coding
LOC100360117	NC_051338.1	8761805..8762651	59.0009	1.37881	2.60054	0.000114166	0.00431691	100360117	protein_coding
Rpl10l	NC_051341.1	complement(84544771..84545863)	1.12022	1.3687	2.58237	0.000407884	0.0108869	299106	protein_coding
LOC103692495	NC_051340.1	complement(148767471..148771767)	0.395955	1.36443	2.57475	0.000958946	0.02053	103692495	lncRNA
LOC120096280	NC_051348.1	complement(65643946..65654938)	0.409632	1.35248	2.5535	0.00214533	0.0360906	120096280	lncRNA
Myh3	NC_051345.1	51770177..51793994	0.242676	1.3289	2.51211	0.00181267	0.0323796	24583	protein_coding
Irf7	NC_051336.1	complement(196367380..196370943)	4.09254	1.32231	2.50066	6.95827e-07	8.11881e-05	293624	protein_coding
Bub1b	NC_051338.1	105563089..105615547	0.321174	1.25547	2.38745	0.000276046	0.00824353	171576	protein_coding
LOC102551006	NC_051340.1	complement(21588142..21628171)	0.195322	1.23094	2.3472	0.000585332	0.0143135	102551006	lncRNA
LOC690468	NC_051337.1	complement(184905148..184905484)	15.4551	1.21415	2.32004	0.000490032	0.0124489	690468	protein_coding
LOC108348823	NC_051353.1	complement(73576668..73581335)	0.212874	1.21168	2.31607	0.00269466	0.0419213	108348823	lncRNA
Cdca3	NC_051339.1	157634775..157638799	0.652483	1.20331	2.30267	0.000738224	0.0169605	297594	protein_coding
LOC102551214	NC_051341.1	125188093..125190513	4.45717	1.17099	2.25167	9.73268e-09	2.2081e-06	102551214	lncRNA
Cebpb	NC_051338.1	156398035..156399466	4.41973	1.15591	2.22825	2.46699e-06	0.000227674	24253	protein_coding
Birc7	NC_051338.1	168047824..168052606	1.319	1.13088	2.18993	0.00199178	0.0346493	296468	protein_coding
Baiap2l1	NC_051347.1	10250434..10339937	0.569798	1.11999	2.17346	0.00239307	0.0388964	304282	protein_coding
Krt17	NC_051345.1	complement(85178673..85183392)	3.3456	1.10392	2.14938	5.7428e-06	0.000446708	287702	protein_coding
Cfap65	NC_051344.1	complement(76459211..76494199)	0.487151	1.09431	2.13511	0.000143118	0.00511177	301521	protein_coding
Gal	NC_051336.1	complement(200650439..200655302)	2.91994	1.05918	2.08374	0.00109093	0.022748	29141	protein_coding
RGD1564162	NC_051355.1	12721738..12725864	0.664396	1.05167	2.07293	0.00293258	0.0445616	499421	protein_coding
Kbtbd11	NC_051351.1	complement(74618291..74638010)	2.67206	-1.00017	-2.00023	6.45014e-10	2.24177e-07	306617	protein_coding
Dhx33	NC_051345.1	complement(55708102..55724618)	0.665628	-1.0002	-2.00028	0.00251208	0.0401709	287464	protein_coding
Gigyf1	NC_051347.1	complement(19166070..19181570)	5.12926	-1.00342	-2.00474	2.47493e-08	4.81286e-06	304378	protein_coding
Rapgef4	NC_051338.1	56809388..57101332	13.6272	-1.00416	-2.00577	1.84867e-27	1.5099e-23	252857	protein_coding
Prex1	NC_051338.1	complement(155306950..155456688)	8.30822	-1.00501	-2.00695	1.43969e-09	4.19953e-07	311647	protein_coding
Sv2c	NC_051337.1	complement(27232933..27428479)	3.06107	-1.02009	-2.02804	9.44771e-06	0.000648438	29643	protein_coding
Sh3pxd2b	NC_051345.1	16918611..17027499	0.309594	-1.02116	-2.02955	5.28823e-06	0.000419336	303021	protein_coding
Zbtb38	NC_051343.1	complement(97284617..97288518)	1.49173	-1.03037	-2.04255	1.40036e-05	0.000873089	315936	protein_coding
Nos1ap	NC_051348.1	complement(82549786..82820949)	3.30367	-1.03103	-2.04348	2.16553e-07	3.18684e-05	192363	protein_coding
Rasa3	NC_051351.1	75855360..75969349	3.70697	-1.03201	-2.04488	4.3084e-06	0.000351889	29372	protein_coding
Fbxw11	NC_051345.1	17232735..17330584	11.8759	-1.03394	-2.0476	8.98122e-22	4.89027e-18	303024	protein_coding
Gmfb	NC_051350.1	complement(20069923..20081005)	4.45511	-1.0354	-2.04969	2.51838e-09	6.74388e-07	81661	protein_coding
rnf141	NC_051336.1	complement(164933972..164957081)	4.86334	-1.03553	-2.04986	1.00021e-06	0.00010749	308900	protein_coding
Phlpp2	NC_051354.1	37835125..37901804	0.406696	-1.04028	-2.05662	0.00304682	0.0456603	498949	protein_coding
Dip2b	NC_051342.1	131174575..131350417	1.62129	-1.04064	-2.05715	6.94536e-10	2.36359e-07	300231	protein_coding
Slc24a2	NC_051340.1	complement(101499536..101739337)	6.78756	-1.04164	-2.05856	2.08484e-16	3.40559e-13	84550	protein_coding
Gria1	NC_051345.1	41210713..41527283	15.7657	-1.04365	-2.06143	1.98699e-15	2.70478e-12	50592	protein_coding
Trpm3	NC_051336.1	219673200..220557610	0.750753	-1.0441	-2.06208	9.6662e-07	0.000105265	309407	protein_coding
Magi2	NC_051339.1	complement(14388322..15870036)	3.3428	-1.05394	-2.07619	6.8812e-12	3.51264e-09	113970	protein_coding
Pcyox1	NC_051339.1	complement(118832114..118842951)	9.17911	-1.05723	-2.08093	8.46373e-13	6.01109e-10	246302	protein_coding
Rab27b	NC_051353.1	complement(63597554..63794124)	0.922643	-1.05965	-2.08443	4.12491e-06	0.000343778	84590	protein_coding
Spred2	NC_051349.1	94226312..94248162	6.0068	-1.06013	-2.08512	8.95415e-08	1.55602e-05	305539	protein_coding
Gabrg3	NC_051336.1	complement(107627450..108247483)	0.978466	-1.06496	-2.09212	0.00109179	0.022748	79211	protein_coding
Ro60	NC_051348.1	complement(55499514..55520504)	0.404065	-1.06938	-2.09853	0.00293595	0.0445713	304833	protein_coding
Bnip5	NC_051355.1	complement(6957736..6975062)	0.500021	-1.06947	-2.09867	0.00140949	0.0273526	689561	protein_coding
Shc3	NC_051352.1	13652247..13772710	1.57222	-1.06966	-2.09894	5.36956e-05	0.00250777	114858	protein_coding
Kcnf1	NC_051341.1	complement(39962301..39964979)	5.65563	-1.07938	-2.11312	2.07267e-11	9.40472e-09	298908	protein_coding
Abcb7	NC_051356.1	complement(69295598..69436775)	1.0976	-1.08192	-2.11686	0.000175574	0.00590715	302395	protein_coding
Pofut1	NC_051338.1	141708618..141735558	1.09797	-1.08565	-2.12233	9.65222e-06	0.000651525	311551	protein_coding
Pde4b	NC_051340.1	116799827..117367707	1.52546	-1.09395	-2.13458	8.01328e-13	5.94986e-10	24626	protein_coding
Ubr1	NC_051338.1	complement(107813721..107921701)	1.07505	-1.09624	-2.13796	5.57116e-07	6.89431e-05	499877	protein_coding
Pou3f4	NC_051356.1	75858646..75859923	2.40893	-1.09814	-2.14079	0.000263221	0.00800913	29589	protein_coding
Ccr5	NC_051343.1	123752423..123757538	1.13817	-1.09834	-2.14109	0.000329616	0.0093674	117029	protein_coding
Mtmr9	NC_051350.1	complement(37769161..37791195)	1.75935	-1.09995	-2.14348	3.66355e-06	0.000311688	282584	protein_coding
Ubtd2	NC_051345.1	17037716..17100263	3.58434	-1.10269	-2.14754	4.44591e-14	3.82231e-11	287178	protein_coding
Zfp319	NC_051354.1	9702827..9706806	1.3085	-1.10522	-2.15131	0.000253335	0.00785242	291849	protein_coding
Map6d1	NC_051346.1	80734148..80740377	7.6923	-1.11225	-2.16182	2.2061e-08	4.39471e-06	363823	protein_coding
Dzank1	NC_051338.1	complement(131855890..131908217)	1.17906	-1.11473	-2.16554	5.39218e-05	0.00250944	311486	protein_coding
Lcn12	NC_051338.1	complement(8312404..8320206)	0.237431	-1.11594	-2.16736	0.00177795	0.0320239	680602	protein_coding
Dnajc16	NC_051340.1	complement(154073372..154106246)	2.89967	-1.1173	-2.1694	2.51015e-08	4.82392e-06	362652	protein_coding
Arfgef3	NC_051336.1	complement(13245578..13404319)	0.620196	-1.12187	-2.17628	6.27346e-06	0.000478276	292947	protein_coding
Gna11	NC_051342.1	8163752..8177636	12.9143	-1.12528	-2.18144	5.31181e-08	9.74925e-06	81662	protein_coding
Alg10	NC_051342.1	121335042..121340308	0.662259	-1.13045	-2.18926	0.00330295	0.0483455	245960	protein_coding
Lin7c	NC_051338.1	96406825..96414137	2.96	-1.13069	-2.18963	0.0016122	0.029791	60442	protein_coding
Kif13b	NC_051350.1	38908318..39062849	0.906684	-1.13218	-2.1919	4.13607e-07	5.27834e-05	305967	protein_coding
Mgat5	NC_051348.1	38675776..38959697	0.642533	-1.13922	-2.20263	7.28297e-06	0.000535888	65271	protein_coding
Igfbp5	NC_051344.1	complement(74452371..74464953)	1.02692	-1.13957	-2.20315	0.00298695	0.045094	25285	protein_coding
Lgi2	NC_051349.1	58415965..58443450	1.71397	-1.14039	-2.2044	3.62911e-05	0.00187008	305417	protein_coding
Wasf3	NC_051347.1	complement(8563805..8660799)	5.6981	-1.14593	-2.21289	3.0263e-11	1.33607e-08	682937	protein_coding
LOC120099830	NC_051336.1	complement(114155536..114162109)	0.894682	-1.14972	-2.21871	0.00168155	0.030725	120099830	lncRNA
Stk10	NC_051345.1	17117860..17212065	0.881146	-1.15678	-2.22959	1.08161e-07	1.82145e-05	29398	protein_coding
Stxbp5l	NC_051346.1	63334667..63654270	0.912289	-1.15781	-2.23119	1.10517e-05	0.000736857	288080	protein_coding
Pgr	NC_051343.1	6073216..6131552	0.405225	-1.15979	-2.23425	0.00152269	0.0288887	25154	protein_coding
Scrt1	NC_051342.1	complement(108240986..108244636)	15.3115	-1.16111	-2.2363	2.34084e-10	9.06402e-08	366951	protein_coding
Rpl3l	NC_051345.1	13753914..13764458	1.58965	-1.17403	-2.2564	0.00147944	0.0282768	287122	protein_coding
Rasal2	NC_051348.1	complement(69279882..69568647)	0.27656	-1.17581	-2.25919	8.93413e-05	0.00359176	304893	protein_coding
Mob1b	NC_051349.1	complement(19333058..19365845)	0.795475	-1.17877	-2.26384	0.000185884	0.00615906	360920	protein_coding
Klhl11	NC_051345.1	complement(85398487..85409049)	1.38946	-1.17925	-2.2646	1.99462e-05	0.00115951	287706	protein_coding
Setd7	NC_051337.1	complement(135562683..135605468)	2.5427	-1.17995	-2.26569	3.36578e-07	4.5438e-05	689954	protein_coding
Lonrf2	NC_051344.1	complement(41033125..41070551)	3.44974	-1.18301	-2.27049	9.57689e-12	4.60113e-09	301361	protein_coding
Ntn4	NC_051342.1	28186611..28300390	1.34273	-1.1834	-2.27112	0.000434845	0.0114383	299737	protein_coding
Srcin1	NC_051345.1	complement(82511101..82568706)	6.22666	-1.18958	-2.28087	3.96189e-15	4.04484e-12	56029	protein_coding
Nhlrc1	NC_051352.1	17674375..17675565	2.10009	-1.18981	-2.28122	7.0176e-05	0.00303261	364682	protein_coding
Dhcr24	NC_051340.1	121344637..121368853	7.81983	-1.19458	-2.28879	2.7712e-07	3.93631e-05	298298	protein_coding
Ush2a	NC_051348.1	99837445..100503935	0.0810516	-1.19878	-2.29545	0.00244793	0.0395519	289369	protein_coding
Exoc8	NC_051354.1	complement(52855010..52857499)	1.8976	-1.20152	-2.29983	2.9459e-07	4.07808e-05	245709	protein_coding
Rab11fip2	NC_051336.1	complement(258950535..259094555)	0.728746	-1.20388	-2.30359	5.37325e-05	0.00250777	308003	protein_coding
Maml3	NC_051337.1	complement(135722585..136136975)	0.485914	-1.20438	-2.30439	0.000380597	0.0104193	310405	protein_coding
Ncs1	NC_051338.1	14523220..14568829	16.2409	-1.20701	-2.30858	1.87382e-13	1.45756e-10	65153	protein_coding
Ankrd52	NC_051342.1	806829..820481	1.27145	-1.2146	-2.32076	2.27681e-06	0.000214981	362811	protein_coding
Pcdhgc5	NC_051353.1	29647201..29666336	17.6412	-1.21524	-2.3218	4.56135e-12	2.48365e-09	641525	protein_coding
Gna13	NC_051345.1	94337939..94370774	1.23898	-1.21531	-2.32191	0.00207536	0.0355564	303634	protein_coding
Syngr1	NC_051342.1	111635911..111659341	12.9686	-1.21675	-2.32423	1.2013e-09	3.63395e-07	29205	protein_coding
Mn1	NC_051347.1	complement(45184060..45220102)	4.38384	-1.21724	-2.32502	1.00108e-10	4.19299e-08	498194	protein_coding
RGD1310429	NC_051345.1	complement(65360924..65373864)	1.75615	-1.22075	-2.33068	3.38847e-06	0.000289794	303764	protein_coding
Tspyl4	NC_051355.1	38098756..38100752	14.0677	-1.22898	-2.344	3.56698e-21	1.45667e-17	309828	protein_coding
Pgap1	NC_051344.1	complement(55975574..56044325)	0.619794	-1.22961	-2.34504	0.000176111	0.00590715	316400	protein_coding
Gnl3l	NC_051356.1	complement(19961277..19994454)	3.70626	-1.24421	-2.36889	2.75572e-09	7.26042e-07	100034253	protein_coding
Pcdhga4	NC_051353.1	29508152..29543103	0.721512	-1.24644	-2.37255	1.24315e-09	3.69216e-07	252894	protein_coding
Myo9a	NC_051343.1	60149234..60348726	0.78804	-1.24878	-2.3764	2.49915e-09	6.74388e-07	171296	protein_coding
Fbxl18	NC_051347.1	11674538..11701317	1.47065	-1.25309	-2.38351	7.35052e-10	2.45042e-07	678726	protein_coding
Tmc7	NC_051336.1	complement(172855777..172905796)	0.695082	-1.25336	-2.38396	0.000445724	0.0116533	499254	protein_coding
Adam23	NC_051344.1	64862878..65006515	3.52676	-1.26893	-2.40983	2.53978e-10	9.42892e-08	301460	protein_coding
Usp22	NC_051345.1	complement(45831226..45855325)	12.3174	-1.26931	-2.41046	2.63528e-15	3.07481e-12	303201	protein_coding
Hrc	NC_051336.1	95813262..95816987	1.81661	-1.28224	-2.43217	0.00228132	0.0376038	292905	protein_coding
Cntnap5a	NC_051348.1	8960951..9962906	0.258762	-1.28744	-2.44095	0.000403039	0.0108284	297832	protein_coding
Add2	NC_051339.1	118444594..118538505	4.77223	-1.29331	-2.45089	1.38105e-14	1.32703e-11	24171	protein_coding
Hspa13	NC_051346.1	complement(14375669..14389853)	2.98584	-1.29747	-2.45798	2.86088e-07	4.02866e-05	29734	protein_coding
Cds2	NC_051338.1	119514963..119553555	3.36919	-1.3025	-2.46655	6.95922e-08	1.23564e-05	114101	protein_coding
Mertk	NC_051338.1	115939351..116045141	2.283	-1.31137	-2.48177	2.15543e-09	5.96763e-07	65037	protein_coding
Mybpc3	NC_051338.1	77095165..77113406	2.22108	-1.32283	-2.50157	0.00168878	0.0308225	295929	protein_coding
Gpr101	NC_051356.1	complement(135540042..135543958)	0.920442	-1.32309	-2.50201	0.000386857	0.0105498	317608	protein_coding
Chrnb2	NC_051337.1	complement(175181402..175189619)	4.58597	-1.34327	-2.53726	5.77513e-08	1.04819e-05	54239	protein_coding
Hyal1	NC_051343.1	108250654..108254526	2.13847	-1.3583	-2.56383	1.12103e-07	1.86858e-05	367166	protein_coding
Slc7a14	NC_051337.1	112065286..112171319	0.865593	-1.37307	-2.59022	0.000255163	0.00787918	499587	protein_coding
Gpd1l	NC_051343.1	complement(114591103..114620771)	3.61197	-1.39173	-2.62392	1.42001e-07	2.28314e-05	363159	protein_coding
Syt13	NC_051338.1	78877200..78915375	8.25394	-1.39273	-2.62576	2.27075e-10	9.04701e-08	80977	protein_coding
Cacng4	NC_051345.1	complement(92686100..92745601)	15.7662	-1.39454	-2.62904	9.07389e-09	2.08763e-06	140725	protein_coding
Cacna2d1	NC_051339.1	complement(18950611..19374969)	1.96824	-1.40015	-2.63929	4.29907e-10	1.52664e-07	25399	protein_coding
Abca5	NC_051345.1	complement(95240159..95309195)	0.429551	-1.40039	-2.63973	3.27697e-05	0.00173796	286970	protein_coding
Myoz2	NC_051337.1	complement(211141463..211168202)	3.30934	-1.41682	-2.66996	0.00267115	0.0416745	295426	protein_coding
Dok6	NC_051353.1	complement(82572762..83015951)	0.922314	-1.42219	-2.67991	0.000178755	0.00597995	498898	protein_coding
Spcs3	NC_051351.1	37305358..37310792	3.15002	-1.43289	-2.69987	1.89346e-06	0.000188596	680782	protein_coding
Mmp19	NC_051342.1	1221229..1229555	0.334817	-1.44307	-2.71899	0.00111506	0.0231737	304608	protein_coding
Hspb7	NC_051340.1	153727782..153731268	5.07194	-1.45374	-2.73918	0.00177855	0.0320239	50565	protein_coding
Cdkal1	NC_051352.1	34718680..34769614	1.27653	-1.46966	-2.76957	0.00272086	0.0422484	361243	protein_coding
Zfp597	NC_051345.1	11653169..11658843	0.935012	-1.47498	-2.7798	0.000348214	0.00975102	266774	protein_coding
Smcr8	NC_051345.1	45457962..45465101	1.14144	-1.47594	-2.78165	2.17482e-08	4.38589e-06	497918	protein_coding
RGD1308750	NC_051356.1	complement(149570869..149572962)	1.40443	-1.48264	-2.79459	4.56556e-07	5.78128e-05	294066	protein_coding
LOC100361087	NC_051348.1	complement(82533538..82538676)	1.00537	-1.50878	-2.84569	0.000694868	0.01631	100361087	protein_coding
Prkce	NC_051341.1	complement(7965048..8451966)	7.8376	-1.50886	-2.84586	7.69617e-20	2.09528e-16	29340	protein_coding
Pnma8c	NC_051336.1	77669040..77671531	5.2059	-1.51764	-2.86323	2.22779e-15	2.79931e-12	120099770	protein_coding
Gjc3	NC_051347.1	complement(16899846..16912309)	0.965028	-1.51869	-2.86531	1.42565e-07	2.28314e-05	288529	protein_coding
Cdk5r1	NC_051345.1	65484266..65485467	8.8453	-1.52646	-2.88078	3.16362e-15	3.44518e-12	116671	protein_coding
Grin2a	NC_051345.1	5630684..6043341	0.493205	-1.52787	-2.8836	2.68589e-06	0.000243745	24409	protein_coding
Palm2	NC_051340.1	72313646..72450645	0.625807	-1.54007	-2.90809	7.81734e-05	0.00331679	103692368	protein_coding
Bcl2	NC_051348.1	complement(22689783..22853920)	0.292157	-1.54413	-2.91628	0.000291258	0.00852634	24224	protein_coding
Myl3	NC_051343.1	110738669..110744814	33.4395	-1.55675	-2.9419	0.000268792	0.00810094	24585	protein_coding
Kif5a	NC_051342.1	complement(63051894..63089024)	77.0726	-1.56138	-2.95136	4.54986e-31	7.4322e-27	314906	protein_coding
Tnnt2	NC_051348.1	47267325..47285390	55.3948	-1.59237	-3.01545	0.000224036	0.00711991	24837	protein_coding
Srgap3	NC_051339.1	complement(145839369..146070556)	3.31469	-1.59881	-3.02894	7.38228e-20	2.09528e-16	500287	protein_coding
Myh6	NC_051350.1	complement(28418120..28442316)	13.2036	-1.60392	-3.03969	6.1693e-05	0.00277619	29556	protein_coding
Lrrc75b	NC_051355.1	13100302..13106503	0.916841	-1.62084	-3.07553	0.000476017	0.0122506	100365744	protein_coding
Myl2	NC_051347.1	complement(34454223..34468554)	61.311	-1.65685	-3.15328	0.000106123	0.00407887	363925	protein_coding
Slc6a11	NC_051339.1	147297972..147413319	5.772	-1.66269	-3.16607	7.72344e-12	3.8231e-09	79213	protein_coding
Tnnc1	NC_051351.1	6400801..6405419	25.3375	-1.66753	-3.17671	9.70112e-05	0.00380019	290561	protein_coding
Ston2	NC_051341.1	complement(110567485..110676376)	0.6088	-1.70015	-3.24934	7.54287e-06	0.000550057	314349	protein_coding
Mrtfb	NC_051345.1	1116315..1278106	3.27545	-1.70221	-3.25399	4.41568e-18	9.25599e-15	100362470	protein_coding
Ckm	NC_051336.1	79061390..79071721	10.6499	-1.70554	-3.26152	0.000404258	0.0108433	24265	protein_coding
Actc1	NC_051338.1	complement(100811987..100817523)	38.7563	-1.71214	-3.27647	0.000152081	0.00529883	29275	protein_coding
Lrrc10	NC_051342.1	52686972..52688369	1.50067	-1.72285	-3.30087	0.00166934	0.0305544	314848	protein_coding
Cox6a2	NC_051336.1	complement(182788528..182790746)	20.9192	-1.75007	-3.36375	0.00135181	0.0265087	25278	protein_coding
LOC102556178	NC_051339.1	49775146..49777251	1.08408	-1.7547	-3.37457	3.74538e-05	0.0018883	102556178	protein_coding
Pgam2	NC_051349.1	complement(80681796..80683907)	4.43984	-1.82481	-3.54261	0.00117433	0.0240083	24959	protein_coding
Tacr3	NC_051337.1	223266536..223363791	0.304458	-1.84814	-3.60036	0.00161476	0.0298047	24808	protein_coding
LOC120098167	NC_051353.1	28589108..28818722	0.146092	-1.89665	-3.72348	0.000978471	0.0208388	120098167	protein_coding
Hs6st3	NC_051350.1	96281502..97000804	1.12499	-1.93907	-3.83457	1.74474e-08	3.60765e-06	364476	protein_coding
Lrrc58	NC_051346.1	complement(62850507..62862829)	1.42643	-1.94741	-3.85683	6.29989e-07	7.62286e-05	303919	protein_coding
Nos1	NC_051347.1	complement(38615111..38795492)	0.877557	-1.94915	-3.86146	1.67774e-13	1.3703e-10	24598	protein_coding
Csrp3	NC_051336.1	complement(98528067..98546647)	3.04405	-1.95484	-3.87674	0.000101869	0.0039432	117505	protein_coding
Mb	NC_051342.1	complement(108759903..108767134)	68.1715	-2.00041	-4.00114	3.81973e-05	0.00191397	59108	protein_coding
Xkr7	NC_051338.1	141500908..141525062	0.321131	-2.0764	-4.21752	4.90507e-05	0.00234282	311549	protein_coding
Perm1	NC_051340.1	166800030..166805323	0.266635	-2.09721	-4.27882	0.000529804	0.0133144	313776	protein_coding
LOC120098166	NC_051353.1	28626060..28818723	0.0878615	-2.13655	-4.39711	0.00123271	0.0247984	120098166	protein_coding
Adcy1	NC_051349.1	81911240..82020594	2.10287	-2.17388	-4.51236	4.53308e-18	9.25599e-15	305509	protein_coding
Cox8b	NC_051336.1	complement(195977183..195978643)	11.1233	-2.31513	-4.9765	6.66918e-05	0.00291286	25250	protein_coding
Neurl1b	NC_051345.1	complement(16758097..16784943)	1.11617	-2.36031	-5.13482	1.58668e-07	2.49216e-05	303019	protein_coding
Aqp7	NC_051340.1	complement(56171649..56186642)	0.216039	-2.54611	-5.84057	0.00248578	0.0399445	29171	protein_coding
LOC501491	NC_051355.1	complement(43755510..43756937)	1.15197	-2.57931	-5.97654	2.2502e-05	0.0012919	501491	protein_coding
Stk32b	NC_051349.1	73077944..73336128	0.0354009	-2.93866	-7.66699	0.000149107	0.00524577	305431	protein_coding
LOC120097355	NC_051336.1	164913704..164917576	0.101811	-2.95748	-7.76768	0.0015657	0.0293637	120097355	lncRNA
