# Supplementary material for: Novel RNA-Seq Signatures Post-Methamphetamine and Oxycodone Use in a Model of HIV-Associated Neurocognitive Disorders
Source: Preprints.org preprint supplement (doi:10.20944/preprints202307.0612.v1), 2023-07-10
Supplement: Supplementary file 3 [file Table S2.xlsx]

## Sheet: WT vs WT_PSU
	Biological Processes
Pie Chart group	ID	Term	Ontology Source	Term PValue	Term PValue Corrected with Benjamini-Hochberg	Group PValue	Group PValue Corrected with Benjamini-Hochberg	GOLevels	GOGroups	% Associated Genes	Nr. Genes	Associated Genes Found
Skeletal muscle cell differentiation	GO:0035914	skeletal muscle cell differentiation	GO_BiologicalProcess-EBI-UniProt-GOA_20.05.2019_00h00	0.000706536	0.00151401	0.000706536	0.00141307	[4, 7, 8, 9]	Group0	4.54545	3	[Egr2, Fos, Maff]
negative regulation of osteoblast differentiation 1.33%	GO:0045668	negative regulation of osteoblast differentiation	GO_BiologicalProcess-EBI-UniProt-GOA_20.05.2019_00h00	0.0057757	0.00633918	0.0057757	0.0057757	[4, 5, 6]	Group1	4.65116	2	[Grp, Ucma]
Cellular response to fatty acid 1.33%	GO:0071398	cellular response to fatty acid	GO_BiologicalProcess-EBI-UniProt-GOA_20.05.2019_00h00	0.000738289	0.00151014	0.000738289	0.00110743	[5, 6]	Group2	4.47761	3	[Hspb1, Kcnk4, Pdk4]
Cellular response to akaline	GO:0010446	response to alkaline pH	GO_BiologicalProcess-EBI-UniProt-GOA_20.05.2019_00h00	6.8186e-05	0.000383546	0.00265862	0.00319034	[4]	Group3	40	2	[Gh1, Kcnk4]
	GO:0071467	cellular response to pH	GO_BiologicalProcess-EBI-UniProt-GOA_20.05.2019_00h00	0.0023062	0.00345931	0.00265862	0.00319034	[4, 5]	Group3	7.40741	2	[Gh1, Kcnk4]
	GO:0071469	cellular response to alkaline pH	GO_BiologicalProcess-EBI-UniProt-GOA_20.05.2019_00h00	2.0525e-05	0.000153938	0.00265862	0.00319034	[5, 6]	Group3	66.6667	2	[Gh1, Kcnk4]
Response to progesterone 29.33%	GO:0044183	protein folding chaperone	GO_BiologicalProcess-EBI-UniProt-GOA_20.05.2019_00h00	0.00153059	0.00264909	8.66652e-10	5.19991e-09	[3]	Group4	9.09091	2	[Hspa1b, Hspb1]
	GO:0048520	positive regulation of behavior	GO_BiologicalProcess-EBI-UniProt-GOA_20.05.2019_00h00	0.00453437	0.00536965	8.66652e-10	5.19991e-09	[2, 3, 4]	Group4	5.26316	2	[Cck, Nr4a3]
	GO:0061077	chaperone-mediated protein folding	GO_BiologicalProcess-EBI-UniProt-GOA_20.05.2019_00h00	0.00774382	0.00774382	8.66652e-10	5.19991e-09	[3]	Group4	4	2	[Hspa1b, Hspb1]
	GO:0009409	response to cold	GO_BiologicalProcess-EBI-UniProt-GOA_20.05.2019_00h00	0.000770938	0.00150836	8.66652e-10	5.19991e-09	[3, 4]	Group4	4.41176	3	[Fos, Fosl2, Hspa1b]
	GO:0060259	regulation of feeding behavior	GO_BiologicalProcess-EBI-UniProt-GOA_20.05.2019_00h00	0.00343434	0.00441558	8.66652e-10	5.19991e-09	[3, 4]	Group4	6.06061	2	[Cck, Nr4a3]
	GO:0032098	regulation of appetite	GO_BiologicalProcess-EBI-UniProt-GOA_20.05.2019_00h00	0.00167354	0.00278923	8.66652e-10	5.19991e-09	[3, 5]	Group4	8.69565	2	[Cck, Pomc]
	GO:0035994	response to muscle stretch	GO_BiologicalProcess-EBI-UniProt-GOA_20.05.2019_00h00	0.00153059	0.00264909	8.66652e-10	5.19991e-09	[4]	Group4	9.09091	2	[Fos, Hspb1]
	GO:0060992	response to fungicide	GO_BiologicalProcess-EBI-UniProt-GOA_20.05.2019_00h00	0.00715458	0.00731719	8.66652e-10	5.19991e-09	[4]	Group4	4.16667	2	[Hspa1b, Klf4]
	GO:0032570	response to progesterone	GO_BiologicalProcess-EBI-UniProt-GOA_20.05.2019_00h00	1.89787e-06	2.8468e-05	8.66652e-10	5.19991e-09	[4, 5, 6]	Group4	6.41026	5	[Fos, Fosb, Fosl2, Junb, Oxt]
	GO:1900408	negative regulation of cellular response to oxidative stress	GO_BiologicalProcess-EBI-UniProt-GOA_20.05.2019_00h00	0.00774382	0.00774382	8.66652e-10	5.19991e-09	[3, 4, 5, 6, 7]	Group4	4	2	[Hspb1, Nr4a3]
	GO:0001661	conditioned taste aversion	GO_BiologicalProcess-EBI-UniProt-GOA_20.05.2019_00h00	0.000142708	0.000642185	8.66652e-10	5.19991e-09	[3, 5, 8]	Group4	28.5714	2	[Fos, Fosl2]
	GO:1903202	negative regulation of oxidative stress-induced cell death	GO_BiologicalProcess-EBI-UniProt-GOA_20.05.2019_00h00	0.00774382	0.00774382	8.66652e-10	5.19991e-09	[4, 5, 6, 7, 8]	Group4	4	2	[Hspb1, Nr4a3]
	GO:0045923	positive regulation of fatty acid metabolic process	GO_BiologicalProcess-EBI-UniProt-GOA_20.05.2019_00h00	0.00407719	0.00495874	8.66652e-10	5.19991e-09	[4, 5, 6, 7, 8, 9]	Group4	5.55556	2	[Avp, Nr4a3]
	GO:0051385	response to mineralocorticoid	GO_BiologicalProcess-EBI-UniProt-GOA_20.05.2019_00h00	0.000947968	0.00170634	8.66652e-10	5.19991e-09	[6, 7]	Group4	4.10959	3	[Fos, Fosb, Junb]
	GO:0051412	response to corticosterone	GO_BiologicalProcess-EBI-UniProt-GOA_20.05.2019_00h00	0.000330584	0.000991751	8.66652e-10	5.19991e-09	[5, 7, 8]	Group4	5.88235	3	[Fos, Fosb, Junb]
	GO:0046320	regulation of fatty acid oxidation	GO_BiologicalProcess-EBI-UniProt-GOA_20.05.2019_00h00	0.00364286	0.00455357	8.66652e-10	5.19991e-09	[5, 6, 7, 8, 9]	Group4	5.88235	2	[Nr4a3, Pdk4]
	GO:0051955	regulation of amino acid transport	GO_BiologicalProcess-EBI-UniProt-GOA_20.05.2019_00h00	0.00774382	0.00774382	8.66652e-10	5.19991e-09	[5, 6, 7, 8, 9]	Group4	4	2	[Avp, Cck]
	GO:0051957	positive regulation of amino acid transport	GO_BiologicalProcess-EBI-UniProt-GOA_20.05.2019_00h00	0.00247943	0.00359917	8.66652e-10	5.19991e-09	[4, 5, 6, 7, 8, 9, 10]	Group4	7.14286	2	[Avp, Cck]
	GO:0014047	glutamate secretion	GO_BiologicalProcess-EBI-UniProt-GOA_20.05.2019_00h00	0.00323162	0.00427715	8.66652e-10	5.19991e-09	[3, 6, 7, 8, 9, 10]	Group4	6.25	2	[Avp, Cck]
	GO:0014048	regulation of glutamate secretion	GO_BiologicalProcess-EBI-UniProt-GOA_20.05.2019_00h00	0.00213897	0.00331909	8.66652e-10	5.19991e-09	[4, 5, 6, 7, 8, 9, 10, 11]	Group4	7.69231	2	[Avp, Cck]
	GO:0014049	positive regulation of glutamate secretion	GO_BiologicalProcess-EBI-UniProt-GOA_20.05.2019_00h00	0.000703974	0.00158394	8.66652e-10	5.19991e-09	[4, 5, 6, 7, 8, 9, 10, 11, 12]	Group4	13.3333	2	[Avp, Cck]
	GO:0061614	pri-miRNA transcription by RNA polymerase II	GO_BiologicalProcess-EBI-UniProt-GOA_20.05.2019_00h00	0.00658676	0.00689312	8.66652e-10	5.19991e-09	[7, 8, 9, 10, 11]	Group4	4.34783	2	[Fos, Klf4]
Hormone activity 62.67%	GO:0002118	aggressive behavior	GO_BiologicalProcess-EBI-UniProt-GOA_20.05.2019_00h00	0.000304258	0.0010532	5.4724e-09	1.64172e-08	[3]	Group5	20	2	[Avp, Oxt]
	GO:0007588	excretion	GO_BiologicalProcess-EBI-UniProt-GOA_20.05.2019_00h00	0.000483517	0.00120879	5.4724e-09	1.64172e-08	[3]	Group5	5.17241	3	[Adra1d, Avp, Oxt]
	GO:0019098	reproductive behavior	GO_BiologicalProcess-EBI-UniProt-GOA_20.05.2019_00h00	0.00551631	0.00620585	5.4724e-09	1.64172e-08	[2, 3, 4]	Group5	4.7619	2	[Avp, Oxt]
	GO:0035176	social behavior	GO_BiologicalProcess-EBI-UniProt-GOA_20.05.2019_00h00	0.000330584	0.000991751	5.4724e-09	1.64172e-08	[3]	Group5	5.88235	3	[Avp, Grp, Oxt]
	GO:0042755	eating behavior	GO_BiologicalProcess-EBI-UniProt-GOA_20.05.2019_00h00	0.000330584	0.000991751	5.4724e-09	1.64172e-08	[3]	Group5	5.88235	3	[Cck, Oxt, P2ry1]
	GO:0048520	positive regulation of behavior	GO_BiologicalProcess-EBI-UniProt-GOA_20.05.2019_00h00	0.00453437	0.00536965	5.4724e-09	1.64172e-08	[2, 3, 4]	Group5	5.26316	2	[Cck, Nr4a3]
	GO:0060259	regulation of feeding behavior	GO_BiologicalProcess-EBI-UniProt-GOA_20.05.2019_00h00	0.00343434	0.00441558	5.4724e-09	1.64172e-08	[3, 4]	Group5	6.06061	2	[Cck, Nr4a3]
	GO:0002125	maternal aggressive behavior	GO_BiologicalProcess-EBI-UniProt-GOA_20.05.2019_00h00	4.09807e-05	0.000263448	5.4724e-09	1.64172e-08	[4]	Group5	50	2	[Avp, Oxt]
	GO:0006972	hyperosmotic response	GO_BiologicalProcess-EBI-UniProt-GOA_20.05.2019_00h00	0.00477145	0.00550552	5.4724e-09	1.64172e-08	[4]	Group5	5.12821	2	[Avp, Oxt]
	GO:0007618	mating	GO_BiologicalProcess-EBI-UniProt-GOA_20.05.2019_00h00	0.000391568	0.0010365	5.4724e-09	1.64172e-08	[3, 4, 5]	Group5	5.55556	3	[Avp, Oxt, P2ry1]
	GO:0009651	response to salt stress	GO_BiologicalProcess-EBI-UniProt-GOA_20.05.2019_00h00	0.00604059	0.00647206	5.4724e-09	1.64172e-08	[4]	Group5	4.54545	2	[Avp, Oxt]
	GO:0032094	response to food	GO_BiologicalProcess-EBI-UniProt-GOA_20.05.2019_00h00	0.000311714	0.00100194	5.4724e-09	1.64172e-08	[3, 5]	Group5	6	3	[Cck, Gh1, Oxt]
	GO:0032098	regulation of appetite	GO_BiologicalProcess-EBI-UniProt-GOA_20.05.2019_00h00	0.00167354	0.00278923	5.4724e-09	1.64172e-08	[3, 5]	Group5	8.69565	2	[Cck, Pomc]
	GO:0060746	parental behavior	GO_BiologicalProcess-EBI-UniProt-GOA_20.05.2019_00h00	0.000803187	0.00150598	5.4724e-09	1.64172e-08	[3, 4, 5]	Group5	12.5	2	[Avp, Oxt]
	GO:0007617	mating behavior	GO_BiologicalProcess-EBI-UniProt-GOA_20.05.2019_00h00	0.00303474	0.00413829	5.4724e-09	1.64172e-08	[3, 4, 5, 6]	Group5	6.45161	2	[Avp, Oxt]
	GO:0098801	regulation of renal system process	GO_BiologicalProcess-EBI-UniProt-GOA_20.05.2019_00h00	0.0057757	0.00633918	5.4724e-09	1.64172e-08	[4, 5]	Group5	4.65116	2	[Avp, Oxt]
	GO:0007620	copulation	GO_BiologicalProcess-EBI-UniProt-GOA_20.05.2019_00h00	7.4048e-05	0.00037024	5.4724e-09	1.64172e-08	[4, 5, 6]	Group5	9.67742	3	[Avp, Oxt, P2ry1]
	GO:0032892	positive regulation of organic acid transport	GO_BiologicalProcess-EBI-UniProt-GOA_20.05.2019_00h00	0.000259316	0.000972434	5.4724e-09	1.64172e-08	[3, 4, 5, 6, 7]	Group5	6.38298	3	[Avp, Cck, Oxt]
	GO:0042538	hyperosmotic salinity response	GO_BiologicalProcess-EBI-UniProt-GOA_20.05.2019_00h00	0.00153059	0.00264909	5.4724e-09	1.64172e-08	[5]	Group5	9.09091	2	[Avp, Oxt]
	GO:0042711	maternal behavior	GO_BiologicalProcess-EBI-UniProt-GOA_20.05.2019_00h00	0.000703974	0.00158394	5.4724e-09	1.64172e-08	[4, 5, 6]	Group5	13.3333	2	[Avp, Oxt]
	GO:0043084	penile erection	GO_BiologicalProcess-EBI-UniProt-GOA_20.05.2019_00h00	1.63219e-05	0.000146898	5.4724e-09	1.64172e-08	[3, 4, 5, 6, 7]	Group5	15.7895	3	[Avp, Oxt, P2ry1]
	GO:0044062	regulation of excretion	GO_BiologicalProcess-EBI-UniProt-GOA_20.05.2019_00h00	0.00343434	0.00441558	5.4724e-09	1.64172e-08	[4, 5, 6]	Group5	6.06061	2	[Avp, Oxt]
	GO:0045777	positive regulation of blood pressure	GO_BiologicalProcess-EBI-UniProt-GOA_20.05.2019_00h00	0.00715458	0.00731719	5.4724e-09	1.64172e-08	[4, 6]	Group5	4.16667	2	[Avp, Oxt]
	GO:0051954	positive regulation of amine transport	GO_BiologicalProcess-EBI-UniProt-GOA_20.05.2019_00h00	0.000330584	0.000991751	5.4724e-09	1.64172e-08	[3, 4, 5, 6, 7]	Group5	5.88235	3	[Avp, Cck, Oxt]
	GO:1900408	negative regulation of cellular response to oxidative stress	GO_BiologicalProcess-EBI-UniProt-GOA_20.05.2019_00h00	0.00774382	0.00774382	5.4724e-09	1.64172e-08	[3, 4, 5, 6, 7]	Group5	4	2	[Hspb1, Nr4a3]
	GO:0005179	hormone activity	GO_BiologicalProcess-EBI-UniProt-GOA_20.05.2019_00h00	2.18866e-09	9.84897e-08	5.4724e-09	1.64172e-08	[4, 5, 6, 7]	Group5	5.92593	8	[Avp, Cck, Cort, Gh1, Grp, Oxt, Pomc, Ttr]
	GO:0060180	female mating behavior	GO_BiologicalProcess-EBI-UniProt-GOA_20.05.2019_00h00	0.000304258	0.0010532	5.4724e-09	1.64172e-08	[4, 5, 6, 7]	Group5	20	2	[Avp, Oxt]
	GO:0060405	regulation of penile erection	GO_BiologicalProcess-EBI-UniProt-GOA_20.05.2019_00h00	0.000611141	0.00144744	5.4724e-09	1.64172e-08	[3, 4, 5, 6, 7, 8]	Group5	14.2857	2	[Oxt, P2ry1]
	GO:1903793	positive regulation of anion transport	GO_BiologicalProcess-EBI-UniProt-GOA_20.05.2019_00h00	0.000706536	0.00151401	5.4724e-09	1.64172e-08	[4, 5, 6, 7]	Group5	4.54545	3	[Avp, Cck, Oxt]
	GO:0045924	regulation of female receptivity	GO_BiologicalProcess-EBI-UniProt-GOA_20.05.2019_00h00	0.000243818	0.000997436	5.4724e-09	1.64172e-08	[3, 5, 6, 7, 8]	Group5	22.2222	2	[Avp, Oxt]
	GO:0060406	positive regulation of penile erection	GO_BiologicalProcess-EBI-UniProt-GOA_20.05.2019_00h00	0.000371244	0.00104412	5.4724e-09	1.64172e-08	[3, 4, 5, 6, 7, 8, 9]	Group5	18.1818	2	[Oxt, P2ry1]
	GO:1903202	negative regulation of oxidative stress-induced cell death	GO_BiologicalProcess-EBI-UniProt-GOA_20.05.2019_00h00	0.00774382	0.00774382	5.4724e-09	1.64172e-08	[4, 5, 6, 7, 8]	Group5	4	2	[Hspb1, Nr4a3]
	GO:0035813	regulation of renal sodium excretion	GO_BiologicalProcess-EBI-UniProt-GOA_20.05.2019_00h00	0.0023062	0.00345931	5.4724e-09	1.64172e-08	[3, 5, 6, 7, 10]	Group5	7.40741	2	[Avp, Oxt]
	GO:0048243	norepinephrine secretion	GO_BiologicalProcess-EBI-UniProt-GOA_20.05.2019_00h00	0.0018226	0.00292919	5.4724e-09	1.64172e-08	[4, 7, 8]	Group5	8.33333	2	[Oxt, P2ry1]
	GO:0005184	neuropeptide hormone activity	GO_BiologicalProcess-EBI-UniProt-GOA_20.05.2019_00h00	5.30134e-09	1.1928e-07	5.4724e-09	1.64172e-08	[5, 6, 7, 8]	Group5	20	5	[Avp, Cck, Cort, Grp, Oxt]
	GO:0035812	renal sodium excretion	GO_BiologicalProcess-EBI-UniProt-GOA_20.05.2019_00h00	0.00265862	0.00373868	5.4724e-09	1.64172e-08	[4, 9]	Group5	6.89655	2	[Avp, Oxt]
	GO:0045923	positive regulation of fatty acid metabolic process	GO_BiologicalProcess-EBI-UniProt-GOA_20.05.2019_00h00	0.00407719	0.00495874	5.4724e-09	1.64172e-08	[4, 5, 6, 7, 8, 9]	Group5	5.55556	2	[Avp, Nr4a3]
	GO:0014061	regulation of norepinephrine secretion	GO_BiologicalProcess-EBI-UniProt-GOA_20.05.2019_00h00	0.00167354	0.00278923	5.4724e-09	1.64172e-08	[5, 6, 7, 8, 9]	Group5	8.69565	2	[Oxt, P2ry1]
	GO:0015874	norepinephrine transport	GO_BiologicalProcess-EBI-UniProt-GOA_20.05.2019_00h00	0.00265862	0.00373868	5.4724e-09	1.64172e-08	[7]	Group5	6.89655	2	[Oxt, P2ry1]
	GO:0042304	regulation of fatty acid biosynthetic process	GO_BiologicalProcess-EBI-UniProt-GOA_20.05.2019_00h00	0.00323162	0.00427715	5.4724e-09	1.64172e-08	[5, 6, 7, 8, 9]	Group5	6.25	2	[Avp, Pdk4]
	GO:0046320	regulation of fatty acid oxidation	GO_BiologicalProcess-EBI-UniProt-GOA_20.05.2019_00h00	0.00364286	0.00455357	5.4724e-09	1.64172e-08	[5, 6, 7, 8, 9]	Group5	5.88235	2	[Nr4a3, Pdk4]
	GO:0051955	regulation of amino acid transport	GO_BiologicalProcess-EBI-UniProt-GOA_20.05.2019_00h00	0.00774382	0.00774382	5.4724e-09	1.64172e-08	[5, 6, 7, 8, 9]	Group5	4	2	[Avp, Cck]
	GO:0051957	positive regulation of amino acid transport	GO_BiologicalProcess-EBI-UniProt-GOA_20.05.2019_00h00	0.00247943	0.00359917	5.4724e-09	1.64172e-08	[4, 5, 6, 7, 8, 9, 10]	Group5	7.14286	2	[Avp, Cck]
	GO:0014047	glutamate secretion	GO_BiologicalProcess-EBI-UniProt-GOA_20.05.2019_00h00	0.00323162	0.00427715	5.4724e-09	1.64172e-08	[3, 6, 7, 8, 9, 10]	Group5	6.25	2	[Avp, Cck]
	GO:0005185	neurohypophyseal hormone activity	GO_BiologicalProcess-EBI-UniProt-GOA_20.05.2019_00h00	6.85324e-06	7.70989e-05	5.4724e-09	1.64172e-08	[6, 7, 8, 9]	Group5	100	2	[Avp, Oxt]
	GO:0014048	regulation of glutamate secretion	GO_BiologicalProcess-EBI-UniProt-GOA_20.05.2019_00h00	0.00213897	0.00331909	5.4724e-09	1.64172e-08	[4, 5, 6, 7, 8, 9, 10, 11]	Group5	7.69231	2	[Avp, Cck]
	GO:0014049	positive regulation of glutamate secretion	GO_BiologicalProcess-EBI-UniProt-GOA_20.05.2019_00h00	0.000703974	0.00158394	5.4724e-09	1.64172e-08	[4, 5, 6, 7, 8, 9, 10, 11, 12]	Group5	13.3333	2	[Avp, Cck]
	Molecular Functions
	ID	Term	Ontology Source	Term PValue	Term PValue Corrected with Benjamini-Hochberg	Group PValue	Group PValue Corrected with Benjamini-Hochberg	GOLevels	GOGroups	% Associated Genes	Nr. Genes	Associated Genes Found
[same as term]	GO:0008426	protein kinase C inhibitor activity	GO_MolecularFunction-EBI-UniProt-GOA_20.05.2019_00h00	0.00501417	0.0200567	0.00501417	0.0376063	[6, 7, 8, 9, 10]	Group00	50	1	[Hspb1]
[same as term]	GO:0090073	positive regulation of protein homodimerization activity	GO_MolecularFunction-EBI-UniProt-GOA_20.05.2019_00h00	0.0370132	0.0394807	0.0370132	0.0504725	[4, 5, 6]	Group01	6.66667	1	[Stpg1]
[same as term]	GO:0004740	pyruvate dehydrogenase (acetyl-transferring) kinase activity	GO_MolecularFunction-EBI-UniProt-GOA_20.05.2019_00h00	0.00751204	0.0240385	0.00751204	0.0375602	[4, 6]	Group02	33.3333	1	[Pdk4]
[same as term]	GO:0005131	growth hormone receptor binding	GO_MolecularFunction-EBI-UniProt-GOA_20.05.2019_00h00	0.014969	0.029938	0.014969	0.044907	[5]	Group03	16.6667	1	[Gh1]
[same as term]	GO:0015467	G-protein activated inward rectifier potassium channel activity	GO_MolecularFunction-EBI-UniProt-GOA_20.05.2019_00h00	0.0100038	0.0266768	0.0100038	0.0375142	[8, 9, 10, 11]	Group04	25	1	[Kcnj6]
[same as term]	GO:0031005	filamin binding	GO_MolecularFunction-EBI-UniProt-GOA_20.05.2019_00h00	0.0345878	0.0395289	0.0345878	0.0518817	[4]	Group05	7.14286	1	[Hspb7]
[same as term]	GO:0070324	thyroid hormone binding	GO_MolecularFunction-EBI-UniProt-GOA_20.05.2019_00h00	0.0174425	0.0310088	0.0174425	0.0436061	[3]	Group06	14.2857	1	[Ttr]
Positive regulation of ATPase-coupled calcium transmembrane transporter activity 4.08%	GO:1901894	regulation of ATPase-coupled calcium transmembrane transporter activity	GO_MolecularFunction-EBI-UniProt-GOA_20.05.2019_00h00	0.0199099	0.0318558	0.0199099	0.042664	[6, 7, 8, 9, 10]	Group07	12.5	1	[Hspa1b]
	GO:1901896	positive regulation of ATPase-coupled calcium transmembrane transporter activity	GO_MolecularFunction-EBI-UniProt-GOA_20.05.2019_00h00	0.014969	0.029938	0.0199099	0.042664	[5, 6, 7, 8, 9, 10, 11]	Group07	16.6667	1	[Hspa1b]
Alpha1-adrenergic receptor activity 4.08%	GO:0004936	alpha-adrenergic receptor activity	GO_MolecularFunction-EBI-UniProt-GOA_20.05.2019_00h00	0.014969	0.029938	0.014969	0.044907	[7]	Group08	16.6667	1	[Adra1d]
	GO:0004937	alpha1-adrenergic receptor activity	GO_MolecularFunction-EBI-UniProt-GOA_20.05.2019_00h00	0.00751204	0.0240385	0.014969	0.044907	[8]	Group08	33.3333	1	[Adra1d]
creatine kinase activity 4.08%	GO:0016775	phosphotransferase activity, nitrogenous group as acceptor	GO_MolecularFunction-EBI-UniProt-GOA_20.05.2019_00h00	0.014969	0.029938	0.014969	0.044907	[4]	Group09	16.6667	1	[Ckm]
	GO:0004111	creatine kinase activity	GO_MolecularFunction-EBI-UniProt-GOA_20.05.2019_00h00	0.0124894	0.0285473	0.014969	0.044907	[5]	Group09	20	1	[Ckm]
SUMO ligase activity 4.08%	GO:0019789	SUMO transferase activity	GO_MolecularFunction-EBI-UniProt-GOA_20.05.2019_00h00	0.0297192	0.0396255	0.0297192	0.0495319	[4]	Group10	8.33333	1	[Egr2]
	GO:0061665	SUMO ligase activity	GO_MolecularFunction-EBI-UniProt-GOA_20.05.2019_00h00	0.0124894	0.0285473	0.0297192	0.0495319	[5]	Group10	20	1	[Egr2]
steroid 11-beta-monooxygenase activity 6.12%	GO:0016713	oxidoreductase activity, acting on paired donors, with incorporation or reduction of molecular oxygen, reduced iron-sulfur protein as one donor, and incorporation of one atom of oxygen	GO_MolecularFunction-EBI-UniProt-GOA_20.05.2019_00h00	0.0223712	0.03254	0.0223712	0.0419461	[4]	Group11	11.1111	1	[Cyp11b1]
	GO:0004507	steroid 11-beta-monooxygenase activity	GO_MolecularFunction-EBI-UniProt-GOA_20.05.2019_00h00	0.00751204	0.0240385	0.0223712	0.0419461	[5]	Group11	33.3333	1	[Cyp11b1]
	GO:0047783	corticosterone 18-monooxygenase activity	GO_MolecularFunction-EBI-UniProt-GOA_20.05.2019_00h00	0.00751204	0.0240385	0.0223712	0.0419461	[5]	Group11	33.3333	1	[Cyp11b1]
NADHX epimerase activity 6.12%	GO:0016854	racemase and epimerase activity	GO_MolecularFunction-EBI-UniProt-GOA_20.05.2019_00h00	0.0394326	0.0394326	0.0394326	0.0492907	[3]	Group12	6.25	1	[Yjefn3]
	GO:0052856	NADHX epimerase activity	GO_MolecularFunction-EBI-UniProt-GOA_20.05.2019_00h00	0.00501417	0.0200567	0.0394326	0.0492907	[4]	Group12	50	1	[Yjefn3]
	GO:0052857	NADPHX epimerase activity	GO_MolecularFunction-EBI-UniProt-GOA_20.05.2019_00h00	0.00501417	0.0200567	0.0394326	0.0492907	[4]	Group12	50	1	[Yjefn3]
Melanocortin receptor binding 8.16%	GO:0031779	melanocortin receptor binding	GO_MolecularFunction-EBI-UniProt-GOA_20.05.2019_00h00	0.00501417	0.0200567	0.00501417	0.0376063	[6]	Group13	50	1	[Pomc]
	GO:0031781	type 3 melanocortin receptor binding	GO_MolecularFunction-EBI-UniProt-GOA_20.05.2019_00h00	0.00501417	0.0200567	0.00501417	0.0376063	[7]	Group13	50	1	[Pomc]
	GO:0031782	type 4 melanocortin receptor binding	GO_MolecularFunction-EBI-UniProt-GOA_20.05.2019_00h00	0.00501417	0.0200567	0.00501417	0.0376063	[7]	Group13	50	1	[Pomc]
	GO:0070996	type 1 melanocortin receptor binding	GO_MolecularFunction-EBI-UniProt-GOA_20.05.2019_00h00	0.00501417	0.0200567	0.00501417	0.0376063	[7]	Group13	50	1	[Pomc]
RNA polymerase II sequence-specific DNA-binding transcription factor recruiting activity 8.16%	GO:0001010	RNA polymerase II sequence-specific DNA-binding transcription factor recruiting activity	GO_MolecularFunction-EBI-UniProt-GOA_20.05.2019_00h00	0.00251016	0.0133875	0.053825	0.0621058	[6]	Group14	100	1	[Klf4]
	GO:0035014	phosphatidylinositol 3-kinase regulator activity	GO_MolecularFunction-EBI-UniProt-GOA_20.05.2019_00h00	0.0394326	0.0394326	0.053825	0.0621058	[4, 5, 6, 7, 8]	Group14	6.25	1	[Klf4]
	GO:1904796	regulation of core promoter binding	GO_MolecularFunction-EBI-UniProt-GOA_20.05.2019_00h00	0.0174425	0.0310088	0.053825	0.0621058	[5, 7]	Group14	14.2857	1	[Klf4]
	GO:1904798	positive regulation of core promoter binding	GO_MolecularFunction-EBI-UniProt-GOA_20.05.2019_00h00	0.014969	0.029938	0.053825	0.0621058	[5, 6, 7, 8]	Group14	16.6667	1	[Klf4]
mechanosenstived potassium channel activity 12.24%	GO:0008381	mechanosensitive ion channel activity	GO_MolecularFunction-EBI-UniProt-GOA_20.05.2019_00h00	0.0321565	0.0395772	0.0726878	0.0726878	[6]	Group15	7.69231	1	[Kcnk4]
	GO:0097603	temperature-gated ion channel activity	GO_MolecularFunction-EBI-UniProt-GOA_20.05.2019_00h00	0.00751204	0.0240385	0.0726878	0.0726878	[5, 6, 7]	Group15	33.3333	1	[Kcnk4]
	GO:0140135	mechanosensitive cation channel activity	GO_MolecularFunction-EBI-UniProt-GOA_20.05.2019_00h00	0.00751204	0.0240385	0.0726878	0.0726878	[5, 6, 7]	Group15	33.3333	1	[Kcnk4]
	GO:0097604	temperature-gated cation channel activity	GO_MolecularFunction-EBI-UniProt-GOA_20.05.2019_00h00	0.00501417	0.0200567	0.0726878	0.0726878	[6, 7, 8]	Group15	50	1	[Kcnk4]
	GO:0098782	mechanosensitived potassium channel activity	GO_MolecularFunction-EBI-UniProt-GOA_20.05.2019_00h00	0.00251016	0.0133875	0.0726878	0.0726878	[6, 7, 8, 9]	Group15	100	1	[Kcnk4]
	GO:0022841	potassium ion leak channel activity	GO_MolecularFunction-EBI-UniProt-GOA_20.05.2019_00h00	0.0394326	0.0394326	0.0726878	0.0726878	[7, 8, 9]	Group15	6.25	1	[Kcnk4]
neuropeptide hormone activity 14.29%	GO:0031855	oxytocin receptor binding	GO_MolecularFunction-EBI-UniProt-GOA_20.05.2019_00h00	0.00251016	0.0133875	6.03766e-09	9.05649e-08	[5]	Group16	100	1	[Oxt]
	GO:0031893	vasopressin receptor binding	GO_MolecularFunction-EBI-UniProt-GOA_20.05.2019_00h00	0.00751204	0.0240385	6.03766e-09	9.05649e-08	[5]	Group16	33.3333	1	[Avp]
	GO:0031894	V1A vasopressin receptor binding	GO_MolecularFunction-EBI-UniProt-GOA_20.05.2019_00h00	0.00501417	0.0200567	6.03766e-09	9.05649e-08	[6]	Group16	50	1	[Avp]
	GO:0031895	V1B vasopressin receptor binding	GO_MolecularFunction-EBI-UniProt-GOA_20.05.2019_00h00	0.00251016	0.0133875	6.03766e-09	9.05649e-08	[6]	Group16	100	1	[Avp]
	GO:0031896	V2 vasopressin receptor binding	GO_MolecularFunction-EBI-UniProt-GOA_20.05.2019_00h00	0.00501417	0.0200567	6.03766e-09	9.05649e-08	[6]	Group16	50	1	[Avp]
	GO:0005184	neuropeptide hormone activity	GO_MolecularFunction-EBI-UniProt-GOA_20.05.2019_00h00	3.98819e-09	6.38111e-08	6.03766e-09	9.05649e-08	[6, 7]	Group16	20	5	[Avp, Cck, Cort, Grp, Oxt]
	GO:0005185	neurohypophyseal hormone activity	GO_MolecularFunction-EBI-UniProt-GOA_20.05.2019_00h00	6.15125e-06	4.921e-05	6.03766e-09	9.05649e-08	[7, 8]	Group16	100	2	[Avp, Oxt]
ATP-activated adenosine receptor activity 14.29%	GO:0001608	G protein-coupled nucleotide receptor activity	GO_MolecularFunction-EBI-UniProt-GOA_20.05.2019_00h00	0.0321565	0.0395772	0.0562032	0.0602177	[5]	Group17	7.69231	1	[P2ry1]
	GO:0001609	G protein-coupled adenosine receptor activity	GO_MolecularFunction-EBI-UniProt-GOA_20.05.2019_00h00	0.0199099	0.0318558	0.0562032	0.0602177	[5]	Group17	12.5	1	[P2ry1]
	GO:0031685	adenosine receptor binding	GO_MolecularFunction-EBI-UniProt-GOA_20.05.2019_00h00	0.014969	0.029938	0.0562032	0.0602177	[5]	Group17	16.6667	1	[P2ry1]
	GO:0031686	A1 adenosine receptor binding	GO_MolecularFunction-EBI-UniProt-GOA_20.05.2019_00h00	0.00751204	0.0240385	0.0562032	0.0602177	[6]	Group17	33.3333	1	[P2ry1]
	GO:0045028	G protein-coupled purinergic nucleotide receptor activity	GO_MolecularFunction-EBI-UniProt-GOA_20.05.2019_00h00	0.0321565	0.0395772	0.0562032	0.0602177	[6]	Group17	7.69231	1	[P2ry1]
	GO:0045031	ATP-activated adenosine receptor activity	GO_MolecularFunction-EBI-UniProt-GOA_20.05.2019_00h00	0.00251016	0.0133875	0.0562032	0.0602177	[6]	Group17	100	1	[P2ry1]
	GO:0045032	ADP-activated adenosine receptor activity	GO_MolecularFunction-EBI-UniProt-GOA_20.05.2019_00h00	0.00251016	0.0133875	0.0562032	0.0602177	[6]	Group17	100	1	[P2ry1]
	KEGG Pathways
	ID	Term	Ontology Source	Term PValue	Term PValue Corrected with Benjamini-Hochberg	Group PValue	Group PValue Corrected with Benjamini-Hochberg	GOLevels	GOGroups	% Associated Genes	Nr. Genes	Associated Genes Found
[same as term]	KEGG:04080	Neuroactive ligand-receptor interaction	KEGG_20.05.2019	4.87799e-07	4.09752e-05	4.87799e-07	6.34139e-06	[-1]	Group00	2.49307	9	[Adra1d, Avp, Cck, Cort, Gh1, Grp, Oxt, P2ry1, Pomc]
[same as term]	KEGG:00330	Arginine and proline metabolism	KEGG_20.05.2019	0.142574	0.460624	0.142574	0.617821	[-1]	Group01	1.92308	1	[Ckm]
[same as term]	KEGG:05202	Transcriptional misregulation in cancer	KEGG_20.05.2019	0.42214	0.466576	0.42214	0.685978	[-1]	Group02	0.543478	1	[Nr4a3]
[same as term]	KEGG:04360	Axon guidance	KEGG_20.05.2019	0.420397	0.470845	0.420397	0.780738	[-1]	Group03	0.546448	1	[Robo3]
[same as term]	KEGG:04550	Signaling pathways regulating pluripotency of stem cells	KEGG_20.05.2019	0.340467	0.453956	0.340467	0.885214	[-1]	Group04	0.714286	1	[Klf4]
[same as term]	KEGG:04918	Thyroid hormone synthesis	KEGG_20.05.2019	0.192026	0.488793	0.192026	0.624084	[-1]	Group05	1.38889	1	[Ttr]
Pancreatic secretion 1.87%	KEGG:04911	Insulin secretion	KEGG_20.05.2019	0.227303	0.444034	0.369484	0.800548	[-1]	Group06	1.14943	1	[Cck]
	KEGG:04972	Pancreatic secretion	KEGG_20.05.2019	0.258889	0.395393	0.369484	0.800548	[-1]	Group06	0.990099	1	[Cck]
JAK-STAT signaling pathway 2.8%	KEGG:04060	Cytokine-cytokine receptor interaction	KEGG_20.05.2019	0.55324	0.559905	1	1	[-1]	Group07	0.371747	1	[Gh1]
	KEGG:04151	PI3K-Akt signaling pathway	KEGG_20.05.2019	1	1	1	1	[-1]	Group07	0.286533	1	[Gh1]
	KEGG:04630	JAK-STAT signaling pathway	KEGG_20.05.2019	0.369484	0.449806	1	1	[-1]	Group07	0.645161	1	[Gh1]
Platelet activation 4.67%	KEGG:04015	Rap1 signaling pathway	KEGG_20.05.2019	0.470555	0.494083	0.663684	0.784354	[-1]	Group08	0.469484	1	[P2ry1]
	KEGG:04512	ECM-receptor interaction	KEGG_20.05.2019	0.231893	0.432867	0.663684	0.784354	[-1]	Group08	1.1236	1	[Gp1bb]
	KEGG:04611	Platelet activation	KEGG_20.05.2019	0.0555686	0.359058	0.663684	0.784354	[-1]	Group08	1.53846	2	[Gp1bb, P2ry1]
	KEGG:04640	Hematopoietic cell lineage	KEGG_20.05.2019	0.249993	0.403835	0.663684	0.784354	[-1]	Group08	1.03093	1	[Gp1bb]
	KEGG:04742	Taste transduction	KEGG_20.05.2019	0.231893	0.432867	0.663684	0.784354	[-1]	Group08	1.1236	1	[P2ry1]
Vascular smooth muscle contraction 6.54%	KEGG:04020	Calcium signaling pathway	KEGG_20.05.2019	0.440986	0.474908	0.675045	0.731299	[-1]	Group09	0.512821	1	[Adra1d]
	KEGG:04022	cGMP-PKG signaling pathway	KEGG_20.05.2019	0.400886	0.4677	0.675045	0.731299	[-1]	Group09	0.581395	1	[Adra1d]
	KEGG:04072	Phospholipase D signaling pathway	KEGG_20.05.2019	0.361868	0.453686	0.675045	0.731299	[-1]	Group09	0.662252	1	[Avp]
	KEGG:04261	Adrenergic signaling in cardiomyocytes	KEGG_20.05.2019	0.350279	0.452668	0.675045	0.731299	[-1]	Group09	0.689655	1	[Adra1d]
	KEGG:04270	Vascular smooth muscle contraction	KEGG_20.05.2019	0.0594118	0.311912	0.675045	0.731299	[-1]	Group09	1.48148	2	[Adra1d, Avp]
	KEGG:04962	Vasopressin-regulated water reabsorption	KEGG_20.05.2019	0.119383	0.436007	0.675045	0.731299	[-1]	Group09	2.32558	1	[Avp]
	KEGG:04970	Salivary secretion	KEGG_20.05.2019	0.206319	0.456073	0.675045	0.731299	[-1]	Group09	1.28205	1	[Adra1d]
cAMP signaling pathway 6.54%	KEGG:00140	Steroid hormone biosynthesis	KEGG_20.05.2019	0.222686	0.445373	0.0554782	0.360608	[-1]	Group10	1.17647	1	[Cyp11b1]
	KEGG:04024	cAMP signaling pathway	KEGG_20.05.2019	0.0230632	0.322885	0.0554782	0.360608	[-1]	Group10	1.42857	3	[Fos, Oxt, Pomc]
	KEGG:04916	Melanogenesis	KEGG_20.05.2019	0.256674	0.399271	0.0554782	0.360608	[-1]	Group10	1	1	[Pomc]
	KEGG:04920	Adipocytokine signaling pathway	KEGG_20.05.2019	0.196817	0.459241	0.0554782	0.360608	[-1]	Group10	1.35135	1	[Pomc]
	KEGG:04925	Aldosterone synthesis and secretion	KEGG_20.05.2019	0.0346074	0.363378	0.0554782	0.360608	[-1]	Group10	2	2	[Cyp11b1, Pomc]
	KEGG:04927	Cortisol synthesis and secretion	KEGG_20.05.2019	0.18236	0.494138	0.0554782	0.360608	[-1]	Group10	1.47059	1	[Pomc]
	KEGG:04934	Cushing syndrome	KEGG_20.05.2019	0.37888	0.454656	0.0554782	0.360608	[-1]	Group10	0.625	1	[Pomc]
histidine metabolism 7.48%	KEGG:00010	Glycolysis / Gluconeogenesis	KEGG_20.05.2019	0.192026	0.488793	0.512107	0.73971	[-1]	Group11	1.38889	1	[Aldh3b2]
	KEGG:00340	Histidine metabolism	KEGG_20.05.2019	0.0684272	0.30252	0.512107	0.73971	[-1]	Group11	4.16667	1	[Aldh3b2]
	KEGG:00350	Tyrosine metabolism	KEGG_20.05.2019	0.111519	0.425802	0.512107	0.73971	[-1]	Group11	2.5	1	[Aldh3b2]
	KEGG:00360	Phenylalanine metabolism	KEGG_20.05.2019	0.0629015	0.310807	0.512107	0.73971	[-1]	Group11	4.54545	1	[Aldh3b2]
	KEGG:00410	beta-Alanine metabolism	KEGG_20.05.2019	0.0929079	0.371632	0.512107	0.73971	[-1]	Group11	3.0303	1	[Aldh3b2]
	KEGG:00980	Metabolism of xenobiotics by cytochrome P450	KEGG_20.05.2019	0.196817	0.459241	0.512107	0.73971	[-1]	Group11	1.35135	1	[Aldh3b2]
	KEGG:00982	Drug metabolism	KEGG_20.05.2019	0.194425	0.46662	0.512107	0.73971	[-1]	Group11	1.36986	1	[Aldh3b2]
	KEGG:05204	Chemical carcinogenesis	KEGG_20.05.2019	0.245507	0.412452	0.512107	0.73971	[-1]	Group11	1.05263	1	[Aldh3b2]
Estrogen signaling pathway 64.49%	KEGG:03040	Spliceosome	KEGG_20.05.2019	0.336502	0.455906	0.538311	0.699805	[-1]	Group12	0.724638	1	[Hspa1b]
	KEGG:04010	MAPK signaling pathway	KEGG_20.05.2019	0.0567606	0.340563	0.538311	0.699805	[-1]	Group12	1	3	[Fos, Hspa1b, Hspb1]
	KEGG:04024	cAMP signaling pathway	KEGG_20.05.2019	0.0230632	0.322885	0.538311	0.699805	[-1]	Group12	1.42857	3	[Fos, Oxt, Pomc]
	KEGG:04141	Protein processing in endoplasmic reticulum	KEGG_20.05.2019	0.3863	0.457031	0.538311	0.699805	[-1]	Group12	0.609756	1	[Hspa1b]
	KEGG:04144	Endocytosis	KEGG_20.05.2019	0.19353	0.478133	0.538311	0.699805	[-1]	Group12	0.727273	2	[Hspa1b, RT1-M6-2]
	KEGG:04145	Phagosome	KEGG_20.05.2019	0.446022	0.474251	0.538311	0.699805	[-1]	Group12	0.50505	1	[RT1-M6-2]
	KEGG:04210	Apoptosis	KEGG_20.05.2019	0.342441	0.449453	0.538311	0.699805	[-1]	Group12	0.70922	1	[Fos]
	KEGG:04213	Longevity regulating pathway	KEGG_20.05.2019	0.170122	0.476341	0.538311	0.699805	[-1]	Group12	1.5873	1	[Hspa1b]
	KEGG:04218	Cellular senescence	KEGG_20.05.2019	0.430781	0.469943	0.538311	0.699805	[-1]	Group12	0.529101	1	[RT1-M6-2]
	KEGG:04370	VEGF signaling pathway	KEGG_20.05.2019	0.157707	0.473122	0.538311	0.699805	[-1]	Group12	1.72414	1	[Hspb1]
	KEGG:04380	Osteoclast differentiation	KEGG_20.05.2019	0.00050701	0.0212944	0.538311	0.699805	[-1]	Group12	3.10078	4	[Fos, Fosb, Fosl2, Junb]
	KEGG:04514	Cell adhesion molecules (CAMs)	KEGG_20.05.2019	0.411605	0.467228	0.538311	0.699805	[-1]	Group12	0.561798	1	[RT1-M6-2]
	KEGG:04612	Antigen processing and presentation	KEGG_20.05.2019	0.0352435	0.32894	0.538311	0.699805	[-1]	Group12	1.9802	2	[Hspa1b, RT1-M6-2]
	KEGG:04620	Toll-like receptor signaling pathway	KEGG_20.05.2019	0.245507	0.412452	0.538311	0.699805	[-1]	Group12	1.05263	1	[Fos]
	KEGG:04625	C-type lectin receptor signaling pathway	KEGG_20.05.2019	0.287104	0.415805	0.538311	0.699805	[-1]	Group12	0.877193	1	[Egr2]
	KEGG:04657	IL-17 signaling pathway	KEGG_20.05.2019	0.0314971	0.377965	0.538311	0.699805	[-1]	Group12	2.10526	2	[Fos, Fosb]
	KEGG:04658	Th1 and Th2 cell differentiation	KEGG_20.05.2019	0.243254	0.417007	0.538311	0.699805	[-1]	Group12	1.06383	1	[Fos]
	KEGG:04659	Th17 cell differentiation	KEGG_20.05.2019	0.276376	0.407291	0.538311	0.699805	[-1]	Group12	0.917431	1	[Fos]
	KEGG:04660	T cell receptor signaling pathway	KEGG_20.05.2019	0.269865	0.404798	0.538311	0.699805	[-1]	Group12	0.943396	1	[Fos]
	KEGG:04662	B cell receptor signaling pathway	KEGG_20.05.2019	0.192026	0.488793	0.538311	0.699805	[-1]	Group12	1.38889	1	[Fos]
	KEGG:04668	TNF signaling pathway	KEGG_20.05.2019	0.041852	0.319597	0.538311	0.699805	[-1]	Group12	1.8018	2	[Fos, Junb]
	KEGG:04713	Circadian entrainment	KEGG_20.05.2019	0.0346074	0.363378	0.538311	0.699805	[-1]	Group12	2	2	[Fos, Kcnj6]
	KEGG:04723	Retrograde endocannabinoid signaling	KEGG_20.05.2019	0.369484	0.449806	0.538311	0.699805	[-1]	Group12	0.645161	1	[Kcnj6]
	KEGG:04725	Cholinergic synapse	KEGG_20.05.2019	0.0439197	0.307438	0.538311	0.699805	[-1]	Group12	1.75439	2	[Fos, Kcnj6]
	KEGG:04726	Serotonergic synapse	KEGG_20.05.2019	0.312229	0.437121	0.538311	0.699805	[-1]	Group12	0.793651	1	[Kcnj6]
	KEGG:04727	GABAergic synapse	KEGG_20.05.2019	0.238729	0.426665	0.538311	0.699805	[-1]	Group12	1.08696	1	[Kcnj6]
	KEGG:04728	Dopaminergic synapse	KEGG_20.05.2019	0.0578634	0.324035	0.538311	0.699805	[-1]	Group12	1.50376	2	[Fos, Kcnj6]
	KEGG:04915	Estrogen signaling pathway	KEGG_20.05.2019	0.00058547	0.0163931	0.538311	0.699805	[-1]	Group12	2.98507	4	[Fos, Hspa1b, Kcnj6, Pomc]
	KEGG:04916	Melanogenesis	KEGG_20.05.2019	0.256674	0.399271	0.538311	0.699805	[-1]	Group12	1	1	[Pomc]
	KEGG:04917	Prolactin signaling pathway	KEGG_20.05.2019	0.196817	0.459241	0.538311	0.699805	[-1]	Group12	1.35135	1	[Fos]
	KEGG:04920	Adipocytokine signaling pathway	KEGG_20.05.2019	0.196817	0.459241	0.538311	0.699805	[-1]	Group12	1.35135	1	[Pomc]
	KEGG:04921	Oxytocin signaling pathway	KEGG_20.05.2019	0.0106288	0.223204	0.538311	0.699805	[-1]	Group12	1.91083	3	[Fos, Kcnj6, Oxt]
	KEGG:04926	Relaxin signaling pathway	KEGG_20.05.2019	0.324471	0.446812	0.538311	0.699805	[-1]	Group12	0.757576	1	[Fos]
	KEGG:04927	Cortisol synthesis and secretion	KEGG_20.05.2019	0.18236	0.494138	0.538311	0.699805	[-1]	Group12	1.47059	1	[Pomc]
	KEGG:04928	Parathyroid hormone synthesis, secretion and action	KEGG_20.05.2019	0.269865	0.404798	0.538311	0.699805	[-1]	Group12	0.943396	1	[Fos]
	KEGG:04934	Cushing syndrome	KEGG_20.05.2019	0.37888	0.454656	0.538311	0.699805	[-1]	Group12	0.625	1	[Pomc]
	KEGG:04940	Type I diabetes mellitus	KEGG_20.05.2019	0.211029	0.454523	0.538311	0.699805	[-1]	Group12	1.25	1	[RT1-M6-2]
	KEGG:05030	Cocaine addiction	KEGG_20.05.2019	0.129764	0.436006	0.538311	0.699805	[-1]	Group12	2.12766	1	[Fosb]
	KEGG:05031	Amphetamine addiction	KEGG_20.05.2019	0.0159391	0.267777	0.538311	0.699805	[-1]	Group12	3.0303	2	[Fos, Fosb]
	KEGG:05032	Morphine addiction	KEGG_20.05.2019	0.240995	0.421741	0.538311	0.699805	[-1]	Group12	1.07527	1	[Kcnj6]
	KEGG:05034	Alcoholism	KEGG_20.05.2019	0.406269	0.467487	0.538311	0.699805	[-1]	Group12	0.571429	1	[Fosb]
	KEGG:05132	Salmonella infection	KEGG_20.05.2019	0.220368	0.451486	0.538311	0.699805	[-1]	Group12	1.19048	1	[Fos]
	KEGG:05133	Pertussis	KEGG_20.05.2019	0.196817	0.459241	0.538311	0.699805	[-1]	Group12	1.35135	1	[Fos]
	KEGG:05134	Legionellosis	KEGG_20.05.2019	0.157707	0.473122	0.538311	0.699805	[-1]	Group12	1.72414	1	[Hspa1b]
	KEGG:05140	Leishmaniasis	KEGG_20.05.2019	0.199203	0.452245	0.538311	0.699805	[-1]	Group12	1.33333	1	[Fos]
	KEGG:05142	Chagas disease (American trypanosomiasis)	KEGG_20.05.2019	0.276376	0.407291	0.538311	0.699805	[-1]	Group12	0.917431	1	[Fos]
	KEGG:05145	Toxoplasmosis	KEGG_20.05.2019	0.295575	0.420819	0.538311	0.699805	[-1]	Group12	0.847458	1	[Hspa1b]
	KEGG:05146	Amoebiasis	KEGG_20.05.2019	0.258889	0.395393	0.538311	0.699805	[-1]	Group12	0.990099	1	[Hspb1]
	KEGG:05161	Hepatitis B	KEGG_20.05.2019	0.0799264	0.335691	0.538311	0.699805	[-1]	Group12	1.25	2	[Egr2, Fos]
	KEGG:05162	Measles	KEGG_20.05.2019	0.0673675	0.314382	0.538311	0.699805	[-1]	Group12	1.37931	2	[Fos, Hspa1b]
	KEGG:05163	Human cytomegalovirus infection	KEGG_20.05.2019	0.530977	0.543928	0.538311	0.699805	[-1]	Group12	0.395257	1	[RT1-M6-2]
	KEGG:05165	Human papillomavirus infection	KEGG_20.05.2019	1	1	0.538311	0.699805	[-1]	Group12	0.277778	1	[RT1-M6-2]
	KEGG:05166	Human T-cell leukemia virus 1 infection	KEGG_20.05.2019	0.0379491	0.318772	0.538311	0.699805	[-1]	Group12	1.17647	3	[Egr2, Fos, RT1-M6-2]
	KEGG:05167	Kaposi sarcoma-associated herpesvirus infection	KEGG_20.05.2019	0.12922	0.452271	0.538311	0.699805	[-1]	Group12	0.938967	2	[Fos, RT1-M6-2]
	KEGG:05168	Herpes simplex virus 1 infection	KEGG_20.05.2019	1	1	0.538311	0.699805	[-1]	Group12	0.241546	1	[RT1-M6-2]
	KEGG:05169	Epstein-Barr virus infection	KEGG_20.05.2019	0.50765	0.526451	0.538311	0.699805	[-1]	Group12	0.421941	1	[RT1-M6-2]
	KEGG:05170	Human immunodeficiency virus 1 infection	KEGG_20.05.2019	0.15968	0.462521	0.538311	0.699805	[-1]	Group12	0.823045	2	[Fos, RT1-M6-2]
	KEGG:05200	Pathways in cancer	KEGG_20.05.2019	1	1	0.538311	0.699805	[-1]	Group12	0.185529	1	[Fos]
	KEGG:05203	Viral carcinogenesis	KEGG_20.05.2019	0.146302	0.455162	0.538311	0.699805	[-1]	Group12	0.869565	2	[Egr2, RT1-M6-2]
	KEGG:05210	Colorectal cancer	KEGG_20.05.2019	0.229601	0.43833	0.538311	0.699805	[-1]	Group12	1.13636	1	[Fos]
	KEGG:05224	Breast cancer	KEGG_20.05.2019	0.358027	0.455671	0.538311	0.699805	[-1]	Group12	0.671141	1	[Fos]
	KEGG:05231	Choline metabolism in cancer	KEGG_20.05.2019	0.254454	0.403285	0.538311	0.699805	[-1]	Group12	1.0101	1	[Fos]
	KEGG:05235	PD-L1 expression and PD-1 checkpoint pathway in cancer	KEGG_20.05.2019	0.236457	0.431791	0.538311	0.699805	[-1]	Group12	1.0989	1	[Fos]
	KEGG:05320	Autoimmune thyroid disease	KEGG_20.05.2019	0.213374	0.448085	0.538311	0.699805	[-1]	Group12	1.23457	1	[RT1-M6-2]
	KEGG:05323	Rheumatoid arthritis	KEGG_20.05.2019	0.240995	0.421741	0.538311	0.699805	[-1]	Group12	1.07527	1	[Fos]
	KEGG:05330	Allograft rejection	KEGG_20.05.2019	0.196817	0.459241	0.538311	0.699805	[-1]	Group12	1.35135	1	[RT1-M6-2]
	KEGG:05332	Graft-versus-host disease	KEGG_20.05.2019	0.18962	0.497752	0.538311	0.699805	[-1]	Group12	1.40845	1	[RT1-M6-2]
	KEGG:05416	Viral myocarditis	KEGG_20.05.2019	0.247753	0.408064	0.538311	0.699805	[-1]	Group12	1.04167	1	[RT1-M6-2]
	KEGG:05418	Fluid shear stress and atherosclerosis	KEGG_20.05.2019	0.36378	0.449376	0.538311	0.699805	[-1]	Group12	0.657895	1	[Fos]

## Sheet: HIV vs HIV_PSU
	Biological Processes
Pie Chart group	ID	Term	Ontology Source	Term PValue	Term PValue Corrected with Benjamini-Hochberg	Group PValue	Group PValue Corrected with Benjamini-Hochberg	GOLevels	GOGroups	% Associated Genes	Nr. Genes	Associated Genes Found
[same as term]	GO:0031444	slow-twitch skeletal muscle fiber contraction	GO_BiologicalProcess-EBI-UniProt-GOA_20.05.2019_00h00	0.000659572	0.000659572	0.000659572	0.000659572	[7, 9]	Group0	50	2	[Mb, Myh6]
[same as term]	GO:0032763	regulation of mast cell cytokine production	GO_BiologicalProcess-EBI-UniProt-GOA_20.05.2019_00h00	0.000659572	0.000659572	0.000659572	0.000659572	[5, 6, 7]	Group1	50	2	[Hmox1, Nr4a3]
[same as term]	GO:1903984	positive regulation of TRAIL-activated apoptotic signaling pathway	GO_BiologicalProcess-EBI-UniProt-GOA_20.05.2019_00h00	0.000332103	0.000415129	0.000332103	0.000415129	[7, 8, 9, 10, 11]	Group2	66.6667	2	[Atf3, Pten]
[same as term]	GO:0045415	negative regulation of interleukin-8 biosynthetic process	GO_BiologicalProcess-EBI-UniProt-GOA_20.05.2019_00h00	0.000659572	0.000659572	0.000659572	0.000659572	[5, 6, 7, 8, 9]	Group3	50	2	[Bcl3, Klf4]
[same as term]	GO:0060279	positive regulation of ovulation	GO_BiologicalProcess-EBI-UniProt-GOA_20.05.2019_00h00	0.000659572	0.000659572	0.000659572	0.000659572	[3, 4, 5, 6, 7, 8, 9]	Group4	50	2	[Inhba, Plat]
[same as term]	GO:0071881	adenylate cyclase-inhibiting adrenergic receptor signaling pathway	GO_BiologicalProcess-EBI-UniProt-GOA_20.05.2019_00h00	0.000111479	0.000185799	0.000111479	0.000185799	[5, 6, 7, 8, 9]	Group5	100	2	[Adra2a, Rgs2]
[same as term]	GO:0090131	mesenchyme migration	GO_BiologicalProcess-EBI-UniProt-GOA_20.05.2019_00h00	2.28078e-05	5.70194e-05	2.28078e-05	5.70194e-05	[3, 5, 6, 7, 8]	Group6	50	3	[Actc1, Actg2, Foxf1]
Regulation of muscle filament sliding speed	GO:0032971	regulation of muscle filament sliding	GO_BiologicalProcess-EBI-UniProt-GOA_20.05.2019_00h00	0.000659572	0.000659572	0.000659572	0.000659572	[5, 6, 7]	Group7	50	2	[Tnnc1, Tnnt2]
	GO:0032972	regulation of muscle filament sliding speed	GO_BiologicalProcess-EBI-UniProt-GOA_20.05.2019_00h00	0.000111479	0.000185799	0.000659572	0.000659572	[3, 6, 7, 8]	Group7	100	2	[Tnnc1, Tnnt2]
Response to corticotropin-releasing hormone 18.18%	GO:0043435	response to corticotropin-releasing hormone	GO_BiologicalProcess-EBI-UniProt-GOA_20.05.2019_00h00	1.14936e-05	5.74679e-05	1.14936e-05	5.74679e-05	[5, 6, 7]	Group8	60	3	[Crhr2, Nr4a1, Nr4a3]
	GO:0071376	cellular response to corticotropin-releasing hormone stimulus	GO_BiologicalProcess-EBI-UniProt-GOA_20.05.2019_00h00	1.14936e-05	5.74679e-05	1.14936e-05	5.74679e-05	[6, 7, 8]	Group8	60	3	[Crhr2, Nr4a1, Nr4a3]
	Molecular Functions
	ID	Term	Ontology Source	Term PValue	Term PValue Corrected with Benjamini-Hochberg	Group PValue	Group PValue Corrected with Benjamini-Hochberg	GOLevels	GOGroups	% Associated Genes	Nr. Genes	Associated Genes Found
[same as term]	GO:0000979	RNA polymerase II core promoter sequence-specific DNA binding	GO_MolecularFunction-EBI-UniProt-GOA_20.05.2019_00h00	0.0394235	0.0422394	0.0394235	0.0450554	[8, 9]	Group0	6.89655	2	[Cebpb, Fos]
[same as term]	GO:0004129	cytochrome-c oxidase activity	GO_MolecularFunction-EBI-UniProt-GOA_20.05.2019_00h00	0.0369637	0.0426504	0.0369637	0.0492849	[4, 5, 7, 8]	Group1	7.14286	2	[Cox6a2, Cox8b]
[same as term]	GO:0032148	activation of protein kinase B activity	GO_MolecularFunction-EBI-UniProt-GOA_20.05.2019_00h00	0.0196597	0.0294895	0.0196597	0.0314555	[6, 7, 8, 9]	Group2	10	2	[Adra2a, Ntf3]
[same as term]	GO:0035259	glucocorticoid receptor binding	GO_MolecularFunction-EBI-UniProt-GOA_20.05.2019_00h00	0.00145743	0.00546538	0.00145743	0.00388649	[7, 8]	Group3	14.2857	3	[Cebpb, Nr4a1, Nr4a3]
[same as term]	GO:0051973	positive regulation of telomerase activity	GO_MolecularFunction-EBI-UniProt-GOA_20.05.2019_00h00	0.0445226	0.0445226	0.0445226	0.0445226	[4, 5, 6, 7, 8, 9]	Group4	6.45161	2	[Grem1, Klf4]
[same as term]	GO:0060590	ATPase regulator activity	GO_MolecularFunction-EBI-UniProt-GOA_20.05.2019_00h00	0.0128529	0.0240992	0.0128529	0.0257058	[4, 5, 8]	Group5	6.66667	3	[Bag3, Dnajb1, Pln]
[same as term]	GO:0005242	inward rectifier potassium channel activity	GO_MolecularFunction-EBI-UniProt-GOA_20.05.2019_00h00	0.0394235	0.0422394	0.0394235	0.0450554	[7, 8, 9, 10]	Group6	6.89655	2	[Kcnj13, Kcnj16]
Acidic amino acid transmembrane transporter activity 23.81%	GO:0005313	L-glutamate transmembrane transporter activity	GO_MolecularFunction-EBI-UniProt-GOA_20.05.2019_00h00	0.0084827	0.0212068	0.000270977	0.00108391	[3, 6, 7, 8, 9]	Group7	15.3846	2	[Slc17a6, Slc25a18]
	GO:0005328	neurotransmitter:sodium symporter activity	GO_MolecularFunction-EBI-UniProt-GOA_20.05.2019_00h00	0.0394235	0.0422394	0.000270977	0.00108391	[3, 7, 8, 9]	Group7	6.89655	2	[Slc6a13, Slc6a7]
	GO:0005343	organic acid:sodium symporter activity	GO_MolecularFunction-EBI-UniProt-GOA_20.05.2019_00h00	0.0277613	0.0378563	0.000270977	0.00108391	[4, 7, 8, 9]	Group7	8.33333	2	[Slc13a4, Slc6a13]
	GO:0015172	acidic amino acid transmembrane transporter activity	GO_MolecularFunction-EBI-UniProt-GOA_20.05.2019_00h00	0.00982618	0.0210561	0.000270977	0.00108391	[6, 8]	Group7	14.2857	2	[Slc17a6, Slc25a18]
	GO:0015556	C4-dicarboxylate transmembrane transporter activity	GO_MolecularFunction-EBI-UniProt-GOA_20.05.2019_00h00	0.00982618	0.0210561	0.000270977	0.00108391	[6, 8]	Group7	14.2857	2	[Slc13a4, Slc25a18]
Regulation of ATPase activity 42.86%	GO:0043462	regulation of ATPase activity	GO_MolecularFunction-EBI-UniProt-GOA_20.05.2019_00h00	0.00016489	0.00247334	9.01896e-06	7.21517e-05	[4, 8]	Group8	8	6	[Dnajb1, Hspa1b, Myh6, Pln, Tnnc1, Tnnt2]
	GO:0017080	sodium channel regulator activity	GO_MolecularFunction-EBI-UniProt-GOA_20.05.2019_00h00	0.0394235	0.0422394	9.01896e-06	7.21517e-05	[3, 4, 7, 8, 9]	Group8	6.89655	2	[Pln, Ptpn3]
	GO:0032780	negative regulation of ATPase activity	GO_MolecularFunction-EBI-UniProt-GOA_20.05.2019_00h00	0.00982618	0.0210561	9.01896e-06	7.21517e-05	[4, 5, 8, 9]	Group8	14.2857	2	[Pln, Tnnt2]
	GO:1901020	negative regulation of calcium ion transmembrane transporter activity	GO_MolecularFunction-EBI-UniProt-GOA_20.05.2019_00h00	0.0369637	0.0426504	9.01896e-06	7.21517e-05	[4, 5, 6, 7, 8, 9]	Group8	7.14286	2	[Pln, Rem2]
	GO:0005388	ATPase-coupled calcium transmembrane transporter activity	GO_MolecularFunction-EBI-UniProt-GOA_20.05.2019_00h00	0.000769369	0.00577027	9.01896e-06	7.21517e-05	[6, 7, 8, 9]	Group8	17.6471	3	[Atp2b4, Hspa1b, Pln]
	GO:1901894	regulation of ATPase-coupled calcium transmembrane transporter activity	GO_MolecularFunction-EBI-UniProt-GOA_20.05.2019_00h00	0.00315588	0.00946765	9.01896e-06	7.21517e-05	[6, 7, 8, 9, 10]	Group8	25	2	[Hspa1b, Pln]
	GO:0008331	high voltage-gated calcium channel activity	GO_MolecularFunction-EBI-UniProt-GOA_20.05.2019_00h00	0.029963	0.0374538	9.01896e-06	7.21517e-05	[8, 9, 10]	Group8	8	2	[Nppa, Rem2]
	GO:0030899	calcium-dependent ATPase activity	GO_MolecularFunction-EBI-UniProt-GOA_20.05.2019_00h00	0.00115162	0.0057581	9.01896e-06	7.21517e-05	[9]	Group8	40	2	[Myh6, Tnnt2]
	GO:1901841	regulation of high voltage-gated calcium channel activity	GO_MolecularFunction-EBI-UniProt-GOA_20.05.2019_00h00	0.0143751	0.0239584	9.01896e-06	7.21517e-05	[7, 8, 9, 10, 11]	Group8	11.7647	2	[Nppa, Rem2]
	KEGG Pathways
	ID	Term	Ontology Source	Term PValue	Term PValue Corrected with Benjamini-Hochberg	Group PValue	Group PValue Corrected with Benjamini-Hochberg	GOLevels	GOGroups	% Associated Genes	Nr. Genes	Associated Genes Found
[same as term]	KEGG:00260	Glycine, serine and threonine metabolism	KEGG_20.05.2019	0.0816472	0.0841987	0.0816472	0.0874792	[-1]	Group00	5	2	[Alas2, Pgam2]
[same as term]	KEGG:00860	Porphyrin and chlorophyll metabolism	KEGG_20.05.2019	0.0125619	0.021818	0.0125619	0.0209365	[-1]	Group01	7.31707	3	[Alas2, Hmox1, Ugt1a2]
[same as term]	KEGG:04080	Neuroactive ligand-receptor interaction	KEGG_20.05.2019	4.93331e-06	5.42664e-05	4.93331e-06	3.69998e-05	[-1]	Group02	4.43213	16	[Adra2a, Aplnr, Chrna4, Crhr2, Gabrg3, Gabrq, Gh1, Hcrtr1, Htr1b, P2ry1, Pmch, Pomc, Prl, Sstr3, Trhr, Vip]
[same as term]	KEGG:04216	Ferroptosis	KEGG_20.05.2019	0.0851901	0.0851901	0.0851901	0.0851901	[-1]	Group03	4.87805	2	[Alox15, Hmox1]
[same as term]	KEGG:04350	TGF-beta signaling pathway	KEGG_20.05.2019	0.028193	0.0387654	0.028193	0.0352413	[-1]	Group04	4.12371	4	[Fmod, Fst, Grem1, Inhba]
[same as term]	KEGG:04371	Apelin signaling pathway	KEGG_20.05.2019	0.00658867	0.0167251	0.00658867	0.0141186	[-1]	Group05	4.25532	6	[Adcy8, Aplnr, Klf2, Myl2, Myl3, Plat]
[same as term]	KEGG:04710	Circadian rhythm	KEGG_20.05.2019	0.0491171	0.057888	0.0491171	0.0566736	[-1]	Group06	6.66667	2	[Cry1, Per2]
[same as term]	KEGG:04721	Synaptic vesicle cycle	KEGG_20.05.2019	0.0137569	0.0226989	0.0137569	0.0206353	[-1]	Group07	5.12821	4	[Slc17a6, Slc6a13, Slc6a7, Stx1a]
[same as term]	KEGG:04920	Adipocytokine signaling pathway	KEGG_20.05.2019	0.011503	0.0210889	0.011503	0.0215682	[-1]	Group08	5.40541	4	[Irs4, Nfkbia, Pck1, Pomc]
Nicotine addiction 5.26%	KEGG:04727	GABAergic synapse	KEGG_20.05.2019	0.0237728	0.0356592	0.00193412	0.00580236	[-1]	Group09	4.34783	4	[Adcy8, Gabrg3, Gabrq, Slc6a13]
	KEGG:05033	Nicotine addiction	KEGG_20.05.2019	0.00124264	0.00512587	0.00193412	0.00580236	[-1]	Group09	10	4	[Chrna4, Gabrg3, Gabrq, Slc17a6]
Metabolism of xenobiotics by cytochrome P450 5.26%	KEGG:00980	Metabolism of xenobiotics by cytochrome P450	KEGG_20.05.2019	0.0577892	0.0635681	0.0213378	0.0290971	[-1]	Group10	4.05405	3	[Cbr3, Gstm2, Ugt1a2]
	KEGG:00982	Drug metabolism	KEGG_20.05.2019	0.0559127	0.0636248	0.0213378	0.0290971	[-1]	Group10	4.10959	3	[Fmo2, Gstm2, Ugt1a2]
Dilated cardiomyopathy (DCM) 10.53%	KEGG:04260	Cardiac muscle contraction	KEGG_20.05.2019	4.80346e-06	7.9257e-05	3.50366e-06	5.2555e-05	[-1]	Group11	9.87654	8	[Actc1, Cox6a2, Cox8b, Myh6, Myl2, Myl3, Tnnc1, Tnnt2]
	KEGG:04261	Adrenergic signaling in cardiomyocytes	KEGG_20.05.2019	7.97892e-06	6.58261e-05	3.50366e-06	5.2555e-05	[-1]	Group11	6.89655	10	[Actc1, Adcy8, Atp2b4, Myh6, Myl2, Myl3, Pln, Scn5a, Tnnc1, Tnnt2]
	KEGG:05410	Hypertrophic cardiomyopathy (HCM)	KEGG_20.05.2019	7.93449e-05	0.000523676	3.50366e-06	5.2555e-05	[-1]	Group11	7.95455	7	[Actc1, Des, Myh6, Myl2, Myl3, Tnnc1, Tnnt2]
	KEGG:05414	Dilated cardiomyopathy (DCM)	KEGG_20.05.2019	1.29022e-06	4.25773e-05	3.50366e-06	5.2555e-05	[-1]	Group11	9.78261	9	[Actc1, Adcy8, Des, Myh6, Myl2, Myl3, Pln, Tnnc1, Tnnt2]
Protein digestion and absorption 13.16%	KEGG:04512	ECM-receptor interaction	KEGG_20.05.2019	0.0213378	0.0335309	0.00613525	0.0153381	[-1]	Group12	4.49438	4	[Col1a1, Col1a2, Col6a3, Thbs2]
	KEGG:04926	Relaxin signaling pathway	KEGG_20.05.2019	0.00479513	0.0143854	0.00613525	0.0153381	[-1]	Group12	4.54545	6	[Adcy8, Col1a1, Col1a2, Col3a1, Fos, Nfkbia]
	KEGG:04974	Protein digestion and absorption	KEGG_20.05.2019	0.00514064	0.0141367	0.00613525	0.0153381	[-1]	Group12	5.31915	5	[Col1a1, Col1a2, Col3a1, Col6a3, Kcnj13]
	KEGG:05140	Leishmaniasis	KEGG_20.05.2019	0.0596953	0.0635466	0.00613525	0.0153381	[-1]	Group12	4	3	[Fos, Nfkbia, Tlr2]
	KEGG:05146	Amoebiasis	KEGG_20.05.2019	0.00695007	0.0152902	0.00613525	0.0153381	[-1]	Group12	4.9505	5	[Col1a1, Col1a2, Col3a1, Hspb1, Tlr2]
Relaxin signaling pathway 18.42%	KEGG:04657	IL-17 signaling pathway	KEGG_20.05.2019	0.0263702	0.0378355	4.23354e-05	0.000158758	[-1]	Group13	4.21053	4	[Cebpb, Fos, Fosb, Nfkbia]
	KEGG:04668	TNF signaling pathway	KEGG_20.05.2019	0.0102481	0.0198933	4.23354e-05	0.000158758	[-1]	Group13	4.5045	5	[Bcl3, Cebpb, Fos, Junb, Nfkbia]
	KEGG:04926	Relaxin signaling pathway	KEGG_20.05.2019	0.00479513	0.0143854	4.23354e-05	0.000158758	[-1]	Group13	4.54545	6	[Adcy8, Col1a1, Col1a2, Col3a1, Fos, Nfkbia]
	KEGG:05031	Amphetamine addiction	KEGG_20.05.2019	0.00774335	0.0159707	4.23354e-05	0.000158758	[-1]	Group13	6.06061	4	[Arc, Fos, Fosb, Stx1a]
	KEGG:05134	Legionellosis	KEGG_20.05.2019	0.0314713	0.0415421	4.23354e-05	0.000158758	[-1]	Group13	5.17241	3	[Hspa1b, Nfkbia, Tlr2]
	KEGG:05140	Leishmaniasis	KEGG_20.05.2019	0.0596953	0.0635466	4.23354e-05	0.000158758	[-1]	Group13	4	3	[Fos, Nfkbia, Tlr2]
	KEGG:05235	PD-L1 expression and PD-1 checkpoint pathway in cancer	KEGG_20.05.2019	0.00447871	0.0147798	4.23354e-05	0.000158758	[-1]	Group13	5.49451	5	[Fos, Nfkbia, Pten, Tlr2, Zap70]
cGMP-PKG signaling pathway 23.68%	KEGG:04022	cGMP-PKG signaling pathway	KEGG_20.05.2019	0.000987725	0.00465642	6.08675e-06	3.04337e-05	[-1]	Group14	4.65116	8	[Adcy8, Adra2a, Atp2b4, Irs4, Nppa, Pln, Rgs2, Trpc6]
	KEGG:04024	cAMP signaling pathway	KEGG_20.05.2019	0.000856724	0.00471198	6.08675e-06	3.04337e-05	[-1]	Group14	4.28571	9	[Adcy8, Atp2b4, Fos, Htr1b, Nfkbia, Nppa, Pln, Pomc, Vip]
	KEGG:04213	Longevity regulating pathway	KEGG_20.05.2019	0.0388289	0.0492829	6.08675e-06	3.04337e-05	[-1]	Group14	4.7619	3	[Adcy8, Hspa1b, Irs4]
	KEGG:04916	Melanogenesis	KEGG_20.05.2019	0.00666774	0.0157168	6.08675e-06	3.04337e-05	[-1]	Group14	5	5	[Adcy8, Pomc, Wnt4, Wnt6, Wnt9b]
	KEGG:04923	Regulation of lipolysis in adipocytes	KEGG_20.05.2019	0.0314713	0.0415421	6.08675e-06	3.04337e-05	[-1]	Group14	5.17241	3	[Adcy8, Irs4, Nppa]
	KEGG:04925	Aldosterone synthesis and secretion	KEGG_20.05.2019	0.00666774	0.0157168	6.08675e-06	3.04337e-05	[-1]	Group14	5	5	[Adcy8, Atp2b4, Nppa, Nr4a1, Pomc]
	KEGG:04927	Cortisol synthesis and secretion	KEGG_20.05.2019	0.0469835	0.0574242	6.08675e-06	3.04337e-05	[-1]	Group14	4.41176	3	[Adcy8, Nr4a1, Pomc]
	KEGG:04934	Cushing syndrome	KEGG_20.05.2019	0.00290241	0.0106422	6.08675e-06	3.04337e-05	[-1]	Group14	4.375	7	[Adcy8, Crhr2, Nr4a1, Pomc, Wnt4, Wnt6, Wnt9b]
	KEGG:05217	Basal cell carcinoma	KEGG_20.05.2019	0.0388289	0.0492829	6.08675e-06	3.04337e-05	[-1]	Group14	4.7619	3	[Wnt4, Wnt6, Wnt9b]

## Sheet: WT_PSU vs HIV_PSU
	Biological Processes
Pie Chart group	ID	Term	Ontology Source	Term PValue	Term PValue Corrected with Benjamini-Hochberg	Group PValue	Group PValue Corrected with Benjamini-Hochberg	GOLevels	GOGroups	% Associated Genes	Nr. Genes	Associated Genes Found
[same as term]	GO:0051798	positive regulation of hair follicle development	GO_BiologicalProcess-EBI-UniProt-GOA_20.05.2019_00h00	0.00289708	0.00289708	0.00289708	0.00289708	[4, 5, 6, 7, 8, 9, 10]	Group0	20	2	[Gal, Krt17]
[same as term]	GO:0098735	positive regulation of the force of heart contraction	GO_BiologicalProcess-EBI-UniProt-GOA_20.05.2019_00h00	0.000986797	0.00142537	0.000986797	0.00126874	[4, 7, 8]	Group1	33.3333	2	[Myl2, Nos1]
[same as term]	GO:0099641	anterograde axonal protein transport	GO_BiologicalProcess-EBI-UniProt-GOA_20.05.2019_00h00	0.00233021	0.0025244	0.00233021	0.00262149	[6, 7, 8, 9, 10, 11]	Group2	22.2222	2	[Kif5a, Rab27b]
[same as term]	GO:0021548	pons development	GO_BiologicalProcess-EBI-UniProt-GOA_20.05.2019_00h00	8.57477e-05	0.00027868	8.57477e-05	0.000128622	[3, 4, 5, 7, 8, 9, 10]	Group3	27.2727	3	[Bcl2, Cdk5r1, Phox2a]
TRAM-dependent toll-like receptor signaling pathway 10.34%	GO:0002756	MyD88-independent toll-like receptor signaling pathway	GO_BiologicalProcess-EBI-UniProt-GOA_20.05.2019_00h00	2.96351e-05	0.000385256	2.96351e-05	6.66789e-05	[7, 8, 9, 10, 11, 12, 13]	Group4	37.5	3	[Irf7, Prkce, Rab11fip2]
	GO:0035668	TRAM-dependent toll-like receptor signaling pathway	GO_BiologicalProcess-EBI-UniProt-GOA_20.05.2019_00h00	6.72279e-05	0.000291321	2.96351e-05	6.66789e-05	[8, 9, 10, 11, 12, 13, 14]	Group4	100	2	[Prkce, Rab11fip2]
	GO:0035669	TRAM-dependent toll-like receptor 4 signaling pathway	GO_BiologicalProcess-EBI-UniProt-GOA_20.05.2019_00h00	6.72279e-05	0.000291321	2.96351e-05	6.66789e-05	[8, 9, 10, 11, 12, 13, 14, 15]	Group4	100	2	[Prkce, Rab11fip2]
Regulation of muscle filament sliding speed 13.79%	GO:0032971	regulation of muscle filament sliding	GO_BiologicalProcess-EBI-UniProt-GOA_20.05.2019_00h00	0.000399017	0.000648403	1.92167e-05	5.76501e-05	[5, 6, 7]	Group5	50	2	[Tnnc1, Tnnt2]
	GO:0032972	regulation of muscle filament sliding speed	GO_BiologicalProcess-EBI-UniProt-GOA_20.05.2019_00h00	6.72279e-05	0.000291321	1.92167e-05	5.76501e-05	[3, 6, 7, 8]	Group5	100	2	[Tnnc1, Tnnt2]
	GO:0051764	actin crosslink formation	GO_BiologicalProcess-EBI-UniProt-GOA_20.05.2019_00h00	0.00289708	0.00289708	1.92167e-05	5.76501e-05	[5, 7]	Group5	20	2	[Baiap2l1, Tnnt2]
	GO:0014883	transition between fast and slow fiber	GO_BiologicalProcess-EBI-UniProt-GOA_20.05.2019_00h00	0.00182221	0.00215352	1.92167e-05	5.76501e-05	[5, 6, 7, 8]	Group5	25	2	[Myh6, Tnnc1]
Neurohypophyseal hormone activity 17.24%	GO:0060180	female mating behavior	GO_BiologicalProcess-EBI-UniProt-GOA_20.05.2019_00h00	6.27401e-05	0.000407811	1.04981e-06	4.72414e-06	[4, 5, 6, 7]	Group6	30	3	[Avp, Oxt, Pgr]
	GO:0045924	regulation of female receptivity	GO_BiologicalProcess-EBI-UniProt-GOA_20.05.2019_00h00	0.00233021	0.0025244	1.04981e-06	4.72414e-06	[3, 5, 6, 7, 8]	Group6	22.2222	2	[Avp, Oxt]
	GO:0070474	positive regulation of uterine smooth muscle contraction	GO_BiologicalProcess-EBI-UniProt-GOA_20.05.2019_00h00	0.00289708	0.00289708	1.04981e-06	4.72414e-06	[5, 6, 7, 8, 9]	Group6	20	2	[Oxt, Tacr3]
	GO:0005185	neurohypophyseal hormone activity	GO_BiologicalProcess-EBI-UniProt-GOA_20.05.2019_00h00	6.72279e-05	0.000291321	1.04981e-06	4.72414e-06	[6, 7, 8, 9]	Group6	100	2	[Avp, Oxt]
	GO:0032847	regulation of cellular pH reduction	GO_BiologicalProcess-EBI-UniProt-GOA_20.05.2019_00h00	0.000986797	0.00142537	1.04981e-06	4.72414e-06	[3, 4, 9, 10, 11, 12]	Group6	33.3333	2	[Avp, Bcl2]
Positive regulation of peptidyl-cysteine S-nitrosylation 20.69%	GO:0017014	protein nitrosylation	GO_BiologicalProcess-EBI-UniProt-GOA_20.05.2019_00h00	0.000185767	0.000402496	5.70645e-05	0.000102716	[6, 7]	Group7	21.4286	3	[LOC100361087, Nos1, Nos1ap]
	GO:0018119	peptidyl-cysteine S-nitrosylation	GO_BiologicalProcess-EBI-UniProt-GOA_20.05.2019_00h00	0.000185767	0.000402496	5.70645e-05	0.000102716	[7, 8, 9]	Group7	21.4286	3	[LOC100361087, Nos1, Nos1ap]
	GO:2000169	regulation of peptidyl-cysteine S-nitrosylation	GO_BiologicalProcess-EBI-UniProt-GOA_20.05.2019_00h00	0.00182221	0.00215352	5.70645e-05	0.000102716	[6, 7, 8, 9, 10]	Group7	25	2	[LOC100361087, Nos1ap]
	GO:2000170	positive regulation of peptidyl-cysteine S-nitrosylation	GO_BiologicalProcess-EBI-UniProt-GOA_20.05.2019_00h00	0.000200593	0.00037253	5.70645e-05	0.000102716	[6, 7, 8, 9, 10, 11]	Group7	66.6667	2	[LOC100361087, Nos1ap]
	GO:0061577	calcium ion transmembrane transport via high voltage-gated calcium channel	GO_BiologicalProcess-EBI-UniProt-GOA_20.05.2019_00h00	0.000185767	0.000402496	5.70645e-05	0.000102716	[9, 10]	Group7	21.4286	3	[Cacna2d1, LOC100361087, Nos1ap]
	GO:1902514	regulation of calcium ion transmembrane transport via high voltage-gated calcium channel	GO_BiologicalProcess-EBI-UniProt-GOA_20.05.2019_00h00	0.000146844	0.000381795	5.70645e-05	0.000102716	[8, 9, 10, 11]	Group7	23.0769	3	[Cacna2d1, LOC100361087, Nos1ap]
Regulation of skeletal muscle adaptation 24.14%	GO:0014733	regulation of skeletal muscle adaptation	GO_BiologicalProcess-EBI-UniProt-GOA_20.05.2019_00h00	6.27401e-05	0.000407811	9.87918e-08	8.89126e-07	[4, 5, 6, 7]	Group8	30	3	[Igfbp5, Myh6, Tnnc1]
	GO:0003010	voluntary skeletal muscle contraction	GO_BiologicalProcess-EBI-UniProt-GOA_20.05.2019_00h00	0.00137406	0.00178628	9.87918e-08	8.89126e-07	[5, 7]	Group8	28.5714	2	[Mb, Myh6]
	GO:0032971	regulation of muscle filament sliding	GO_BiologicalProcess-EBI-UniProt-GOA_20.05.2019_00h00	0.000399017	0.000648403	9.87918e-08	8.89126e-07	[5, 6, 7]	Group8	50	2	[Tnnc1, Tnnt2]
	GO:0032972	regulation of muscle filament sliding speed	GO_BiologicalProcess-EBI-UniProt-GOA_20.05.2019_00h00	6.72279e-05	0.000291321	9.87918e-08	8.89126e-07	[3, 6, 7, 8]	Group8	100	2	[Tnnc1, Tnnt2]
	GO:0014883	transition between fast and slow fiber	GO_BiologicalProcess-EBI-UniProt-GOA_20.05.2019_00h00	0.00182221	0.00215352	9.87918e-08	8.89126e-07	[5, 6, 7, 8]	Group8	25	2	[Myh6, Tnnc1]
	GO:0014721	twitch skeletal muscle contraction	GO_BiologicalProcess-EBI-UniProt-GOA_20.05.2019_00h00	0.00137406	0.00178628	9.87918e-08	8.89126e-07	[6, 8]	Group8	28.5714	2	[Mb, Myh6]
	GO:0031444	slow-twitch skeletal muscle fiber contraction	GO_BiologicalProcess-EBI-UniProt-GOA_20.05.2019_00h00	0.000399017	0.000648403	9.87918e-08	8.89126e-07	[7, 9]	Group8	50	2	[Mb, Myh6]
	Molecular Functions
	ID	Term	Ontology Source	Term PValue	Term PValue Corrected with Benjamini-Hochberg	Group PValue	Group PValue Corrected with Benjamini-Hochberg	GOLevels	GOGroups	% Associated Genes	Nr. Genes	Associated Genes Found
[same as term]	GO:0003785	actin monomer binding	GO_MolecularFunction-EBI-UniProt-GOA_20.05.2019_00h00	0.0015463	0.00375529	0.0015463	0.00463889	[5]	Group00	10.7143	3	[Myl2, Myl3, Prkce]
[same as term]	GO:0017080	sodium channel regulator activity	GO_MolecularFunction-EBI-UniProt-GOA_20.05.2019_00h00	0.0237066	0.0268675	0.0237066	0.0258618	[3, 4, 7, 8, 9]	Group01	6.89655	2	[Gpd1l, Nos1]
[same as term]	GO:0005227	calcium activated cation channel activity	GO_MolecularFunction-EBI-UniProt-GOA_20.05.2019_00h00	0.0285019	0.0302833	0.0285019	0.0285019	[5, 6, 7]	Group02	6.25	2	[Gal, Trpm3]
[same as term]	GO:0030552	cAMP binding	GO_MolecularFunction-EBI-UniProt-GOA_20.05.2019_00h00	0.0152549	0.0216111	0.0152549	0.0228823	[4, 5, 6, 7, 8]	Group03	8.69565	2	[Pde4b, Rapgef4]
[same as term]	GO:0043496	regulation of protein homodimerization activity	GO_MolecularFunction-EBI-UniProt-GOA_20.05.2019_00h00	0.017896	0.0234024	0.017896	0.0238613	[4, 5]	Group04	8	2	[Bcl2, Gnl3l]
[same as term]	GO:0004129	cytochrome-c oxidase activity	GO_MolecularFunction-EBI-UniProt-GOA_20.05.2019_00h00	0.0221899	0.0269449	0.0221899	0.0266279	[4, 5, 7, 8]	Group05	7.14286	2	[Cox6a2, Cox8b]
[same as term]	GO:0004860	protein kinase inhibitor activity	GO_MolecularFunction-EBI-UniProt-GOA_20.05.2019_00h00	0.00766804	0.0144841	0.00766804	0.0131452	[4, 5, 6, 7, 8]	Group06	6.12245	3	[Ncs1, Smcr8, Spred2]
calcium-dependent ATPase activity 9.09%	GO:0000146	microfilament motor activity	GO_MolecularFunction-EBI-UniProt-GOA_20.05.2019_00h00	0.0116422	0.0179925	0.000978629	0.00587178	[8]	Group07	10	2	[Myh3, Myh6]
	GO:0030899	calcium-dependent ATPase activity	GO_MolecularFunction-EBI-UniProt-GOA_20.05.2019_00h00	0.000664438	0.00376515	0.000978629	0.00587178	[9]	Group07	40	2	[Myh6, Tnnt2]
neurotransmitter receptor activity involved in regulation of postsynaptic membrane potential 9.09%	GO:0099529	neurotransmitter receptor activity involved in regulation of postsynaptic membrane potential	GO_MolecularFunction-EBI-UniProt-GOA_20.05.2019_00h00	0.000948366	0.00322445	0.000948366	0.0113804	[5]	Group08	7.54717	4	[Chrnb2, Gabrg3, Gria1, Grin2a]
	GO:1904315	transmitter-gated ion channel activity involved in regulation of postsynaptic membrane potential	GO_MolecularFunction-EBI-UniProt-GOA_20.05.2019_00h00	0.000760235	0.003231	0.000948366	0.0113804	[6, 8, 9, 10]	Group08	8	4	[Chrnb2, Gabrg3, Gria1, Grin2a]
myosin V binding	GO:0031489	myosin V binding	GO_MolecularFunction-EBI-UniProt-GOA_20.05.2019_00h00	0.00947639	0.0161099	0.00310518	0.00745243	[5]	Group09	11.1111	2	[Gria1, Rab27b]
	GO:0031690	adrenergic receptor binding	GO_MolecularFunction-EBI-UniProt-GOA_20.05.2019_00h00	0.017896	0.0234024	0.00310518	0.00745243	[5]	Group09	8	2	[Gria1, Magi2]
	GO:0004971	AMPA glutamate receptor activity	GO_MolecularFunction-EBI-UniProt-GOA_20.05.2019_00h00	0.0285019	0.0302833	0.00310518	0.00745243	[6, 7, 8, 9, 10, 11]	Group09	6.25	2	[Cacng4, Gria1]
neurohypophyseal hormone activity 18.18%	GO:0043028	cysteine-type endopeptidase regulator activity involved in apoptotic process	GO_MolecularFunction-EBI-UniProt-GOA_20.05.2019_00h00	0.0301796	0.0301796	0.00124721	0.00498882	[3, 4, 8, 9]	Group10	6.06061	2	[Avp, Birc7]
	GO:0005184	neuropeptide hormone activity	GO_MolecularFunction-EBI-UniProt-GOA_20.05.2019_00h00	0.0011054	0.00313197	0.00124721	0.00498882	[6, 7]	Group10	12	3	[Avp, Gal, Oxt]
	GO:0043027	cysteine-type endopeptidase inhibitor activity involved in apoptotic process	GO_MolecularFunction-EBI-UniProt-GOA_20.05.2019_00h00	0.017896	0.0234024	0.00124721	0.00498882	[4, 5, 7, 8, 9, 10]	Group10	8	2	[Avp, Birc7]
	GO:0005185	neurohypophyseal hormone activity	GO_MolecularFunction-EBI-UniProt-GOA_20.05.2019_00h00	6.75352e-05	0.0011481	0.00124721	0.00498882	[7, 8]	Group10	100	2	[Avp, Oxt]
regulation of high voltage-gated calcium channel acitivity 18.18%	GO:0004517	nitric-oxide synthase activity	GO_MolecularFunction-EBI-UniProt-GOA_20.05.2019_00h00	0.00766804	0.0144841	0.00558079	0.0111616	[5]	Group11	6.12245	3	[LOC100361087, Nos1, Nos1ap]
	GO:1901385	regulation of voltage-gated calcium channel activity	GO_MolecularFunction-EBI-UniProt-GOA_20.05.2019_00h00	0.004038	0.00858076	0.00558079	0.0111616	[6, 7, 8, 9, 10]	Group11	7.69231	3	[Cacna2d1, LOC100361087, Nos1ap]
	GO:0008331	high voltage-gated calcium channel activity	GO_MolecularFunction-EBI-UniProt-GOA_20.05.2019_00h00	0.0011054	0.00313197	0.00558079	0.0111616	[8, 9, 10]	Group11	12	3	[Cacna2d1, LOC100361087, Nos1ap]
	GO:1901841	regulation of high voltage-gated calcium channel activity	GO_MolecularFunction-EBI-UniProt-GOA_20.05.2019_00h00	0.000342971	0.00291526	0.00558079	0.0111616	[7, 8, 9, 10, 11]	Group11	17.6471	3	[Cacna2d1, LOC100361087, Nos1ap]	down
	KEGG Pathways
	ID	Term	Ontology Source	Term PValue	Term PValue Corrected with Benjamini-Hochberg	Group PValue	Group PValue Corrected with Benjamini-Hochberg	GOLevels	GOGroups	% Associated Genes	Nr. Genes	Associated Genes Found
[same as term]	KEGG:04215	Apoptosis	KEGG_20.05.2019	0.0430274	0.0430274	0.0430274	0.0430274	[-1]	Group0	5.88235	2	[Bcl2, Birc7]
[same as term]	KEGG:04730	Long-term depression	KEGG_20.05.2019	0.00304725	0.00342816	0.00304725	0.00507875	[-1]	Group1	6.45161	4	[Gna11, Gna13, Gria1, Nos1]
[same as term]	KEGG:05033	Nicotine addiction	KEGG_20.05.2019	0.000587239	0.00105703	0.000587239	0.0014681	[-1]	Group2	10	4	[Chrnb2, Gabrg3, Gria1, Grin2a]
Amyotrophic lateral sclerosis (ALS) 22.22%	KEGG:04713	Circadian entrainment	KEGG_20.05.2019	0.00284569	0.00365874	0.00313535	0.00391918	[-1]	Group3	5	5	[Adcy1, Gria1, Grin2a, Nos1, Nos1ap]
	KEGG:05014	Amyotrophic lateral sclerosis (ALS)	KEGG_20.05.2019	0.002097	0.0031455	0.00313535	0.00391918	[-1]	Group3	7.14286	4	[Bcl2, Gria1, Grin2a, Nos1]
Cardiac muscle contraction 44.44%	KEGG:04260	Cardiac muscle contraction	KEGG_20.05.2019	4.82389e-09	4.3415e-08	4.52703e-08	2.26351e-07	[-1]	Group4	12.3457	10	[Actc1, Cacna2d1, Cacng4, Cox6a2, Cox8b, Myh6, Myl2, Myl3, Tnnc1, Tnnt2]
	KEGG:04261	Adrenergic signaling in cardiomyocytes	KEGG_20.05.2019	1.36765e-07	4.10295e-07	4.52703e-08	2.26351e-07	[-1]	Group4	7.58621	11	[Actc1, Adcy1, Bcl2, Cacna2d1, Cacng4, Myh6, Myl2, Myl3, Rapgef4, Tnnc1, Tnnt2]
	KEGG:05410	Hypertrophic cardiomyopathy (HCM)	KEGG_20.05.2019	1.57551e-07	3.54489e-07	4.52703e-08	2.26351e-07	[-1]	Group4	10.2273	9	[Actc1, Cacna2d1, Cacng4, Mybpc3, Myh6, Myl2, Myl3, Tnnc1, Tnnt2]
	KEGG:05414	Dilated cardiomyopathy (DCM)	KEGG_20.05.2019	1.69789e-08	7.6405e-08	4.52703e-08	2.26351e-07	[-1]	Group4	10.8696	10	[Actc1, Adcy1, Cacna2d1, Cacng4, Mybpc3, Myh6, Myl2, Myl3, Tnnc1, Tnnt2]
