# Supplementary material for: Novel RNA-Seq Signatures Post-Methamphetamine and Oxycodone Use in a Model of HIV-Associated Neurocognitive Disorders
Source: Preprints.org preprint supplement (doi:10.20944/preprints202307.0612.v1), 2023-07-10
Supplement: Supplementary file 4 [file Table S3.xlsx]

## Sheet: WT vs. WT+PSU
WT vs. WT+PSU
© 2000-2023 QIAGEN. All rights reserved.
Ingenuity Canonical Pathways	-log(p-value)	Ratio	z-score	Molecules
Opioid Signaling Pathway	3.39	0.0179	#NUM!	EGR4,FOS,FOSB,KCNJ6,POMC
Role of JAK family kinases in IL-6-type Cytokine Signaling	3.13	0.038	#NUM!	FOS,JUNB,POMC
IL-6 Signaling	2.51	0.0233	#NUM!	FOS,HSPB1,HSPB7
Oxytocin Signaling Pathway	2.43	0.0142	1	FOS,HSPB1,HSPB7,OXT
Aryl Hydrocarbon Receptor Signaling	2.26	0.0189	#NUM!	FOS,HSPB1,HSPB7
Aldosterone Signaling in Epithelial Cells	2.17	0.0174	#NUM!	HSPA1A/HSPA1B,HSPB1,HSPB7
Role of JAK2 in Hormone-like Cytokine Signaling	2.07	0.0323	#NUM!	FOS,POMC
Glucocorticoid Receptor Signaling	2.01	0.00859	#NUM!	FOS,HSPA1A/HSPA1B,PDK4,POMC,RT1-M6-1/RT1-M6-2
Growth Hormone Signaling	1.95	0.0282	#NUM!	CSHL1,FOS
Creatine-phosphate Biosynthesis	1.95	0.2	#NUM!	CKM
GPCR-Mediated Integration of Enteroendocrine Signaling Exemplified by an L Cell	1.91	0.0267	#NUM!	CCK,GRP
ERK/MAPK Signaling	1.9	0.014	#NUM!	FOS,HSPB1,HSPB7
NRF2-mediated Oxidative Stress Response	1.79	0.0127	#NUM!	FOS,JUNB,MAFF
Death Receptor Signaling	1.71	0.0208	#NUM!	HSPB1,HSPB7
Protein Ubiquitination Pathway	1.63	0.011	#NUM!	HSPA1A/HSPA1B,HSPB1,HSPB7
Mineralocorticoid Biosynthesis	1.54	0.0769	#NUM!	CYP11B2
Cholecystokinin/Gastrin-mediated Signaling	1.53	0.0168	#NUM!	CCK,FOS
p38 MAPK Signaling	1.53	0.0167	#NUM!	HSPB1,HSPB7
Glucocorticoid Biosynthesis	1.51	0.0714	#NUM!	CYP11B2
P2Y Purigenic Receptor Signaling Pathway	1.44	0.015	#NUM!	FOS,P2RY1
Role of PKR in Interferon Induction and Antiviral Response	1.43	0.0147	#NUM!	FOS,HSPA1A/HSPA1B
Corticotropin Releasing Hormone Signaling	1.34	0.0132	#NUM!	FOS,POMC
Histamine Degradation	1.34	0.0476	#NUM!	Aldh3b2
Fatty Acid α-oxidation	1.34	0.0476	#NUM!	Aldh3b2
Putrescine Degradation III	1.32	0.0455	#NUM!	Aldh3b2
Ethanol Degradation IV	1.26	0.04	#NUM!	Aldh3b2
IL-17A Signaling in Gastric Cells	1.25	0.0385	#NUM!	FOS
Tryptophan Degradation X (Mammalian, via Tryptamine)	1.23	0.037	#NUM!	Aldh3b2
Acute Phase Response Signaling	1.19	0.0108	#NUM!	FOS,TTR
NOD1/2 Signaling Pathway	1.17	0.0106	#NUM!	FOS,HSPA1A/HSPA1B
TNFR2 Signaling	1.16	0.0312	#NUM!	FOS
Dopamine Degradation	1.16	0.0312	#NUM!	Aldh3b2
Macrophage Alternative Activation Signaling Pathway	1.12	0.0099	#NUM!	FOS,KLF4
Oxytocin In Spinal Neurons Signaling Pathway	1.12	0.0286	#NUM!	OXT
Ethanol Degradation II	1.12	0.0286	#NUM!	Aldh3b2
Noradrenaline and Adrenaline Degradation	1.1	0.027	#NUM!	Aldh3b2
IL-17A Signaling in Fibroblasts	1.09	0.0263	#NUM!	FOS
April Mediated Signaling	1.04	0.0238	#NUM!	FOS
B Cell Activating Factor Signaling	1.04	0.0233	#NUM!	FOS
MIF Regulation of Innate Immunity	1.03	0.0227	#NUM!	FOS
Neurovascular Coupling Signaling Pathway	1.02	0.00862	#NUM!	KCNJ6,P2RY1
iNOS Signaling	1	0.0213	#NUM!	FOS
AMPK Signaling	0.987	0.00826	#NUM!	ADRA1D,CKM
TNFR1 Signaling	0.967	0.0196	#NUM!	FOS
UVC-Induced MAPK Signaling	0.967	0.0196	#NUM!	FOS
UVB-Induced MAPK Signaling	0.959	0.0192	#NUM!	FOS
Cardiac Hypertrophy Signaling	0.936	0.00766	#NUM!	ADRA1D,HSPB1
CSDE1 Signaling Pathway	0.928	0.0179	#NUM!	FOS
EGF Signaling	0.928	0.0179	#NUM!	FOS
CD27 Signaling in Lymphocytes	0.921	0.0175	#NUM!	FOS
Oxidative Ethanol Degradation III	0.921	0.0175	#NUM!	Aldh3b2
Cardiac Hypertrophy Signaling (Enhanced)	0.914	0.00554	#NUM!	ADRA1D,HSPB1,HSPB7
Polyamine Regulation in Colon Cancer	0.907	0.0169	#NUM!	FOS
Insulin Secretion Signaling Pathway	0.903	0.00735	#NUM!	CCK,CSHL1
PCP (Planar Cell Polarity) Pathway	0.9	0.0167	#NUM!	JUNB
Chronic Myeloid Leukemia Signaling	0.889	0.00719	#NUM!	FOS,KLF4
IL-2 Signaling	0.886	0.0161	#NUM!	FOS
Thrombopoietin Signaling	0.879	0.0159	#NUM!	FOS
CD40 Signaling	0.854	0.0149	#NUM!	FOS
Serotonin Degradation	0.83	0.0141	#NUM!	Aldh3b2
ERK5 Signaling	0.815	0.0135	#NUM!	FOS
Leptin Signaling in Obesity	0.804	0.0132	#NUM!	POMC
GDNF Family Ligand-Receptor Interactions	0.804	0.0132	#NUM!	FOS
Neuroinflammation Signaling Pathway	0.799	0.00631	#NUM!	FOS,KCNJ6
VDR/RXR Activation	0.793	0.0128	#NUM!	KLF4
Toll-like Receptor Signaling	0.793	0.0128	#NUM!	FOS
Neurotrophin/TRK Signaling	0.793	0.0128	#NUM!	FOS
IL-3 Signaling	0.788	0.0127	#NUM!	FOS
Renal Cell Carcinoma Signaling	0.788	0.0127	#NUM!	FOS
Thyroid Cancer Signaling	0.788	0.0127	#NUM!	FOS
Myelination Signaling Pathway	0.777	0.00612	#NUM!	EGR2,FOS
Estrogen-Dependent Breast Cancer Signaling	0.777	0.0123	#NUM!	FOS
Chemokine Signaling	0.777	0.0123	#NUM!	FOS
JAK/STAT Signaling	0.772	0.0122	#NUM!	FOS
VEGF Family Ligand-Receptor Interactions	0.764	0.0119	#NUM!	FOS
BAG2 Signaling Pathway	0.764	0.0119	#NUM!	HSPA1A/HSPA1B
LPS-stimulated MAPK Signaling	0.759	0.0118	#NUM!	FOS
PDGF Signaling	0.75	0.0115	#NUM!	FOS
Immunogenic Cell Death Signaling Pathway	0.738	0.0111	#NUM!	HSPA1A/HSPA1B
Unfolded protein response	0.738	0.0111	#NUM!	HSPA1A/HSPA1B
Ceramide Signaling	0.733	0.011	#NUM!	FOS
RANK Signaling in Osteoclasts	0.733	0.011	#NUM!	FOS
ERBB Signaling	0.724	0.0108	#NUM!	FOS
Prolactin Signaling	0.714	0.0105	#NUM!	FOS
IL-1 Signaling	0.712	0.0104	#NUM!	FOS
TGF-β Signaling	0.712	0.0104	#NUM!	FOS
p53 Signaling	0.703	0.0102	#NUM!	GML
Melanocyte Development and Pigmentation Signaling	0.703	0.0102	#NUM!	POMC
UVA-Induced MAPK Signaling	0.703	0.0102	#NUM!	FOS
Neuropathic Pain Signaling In Dorsal Horn Neurons	0.69	0.0099	#NUM!	FOS
Sumoylation Pathway	0.684	0.00971	#NUM!	FOS
G-Protein Coupled Receptor Signaling	0.68	0.00427	#NUM!	ADRA1D,FOS,P2RY1
IGF-1 Signaling	0.676	0.00952	#NUM!	FOS
PPAR Signaling	0.67	0.00935	#NUM!	FOS
CDK5 Signaling	0.642	0.0087	#NUM!	FOSB
IL-13 Signaling Pathway	0.638	0.00862	#NUM!	FOSL2
GPCR-Mediated Nutrient Sensing in Enteroendocrine Cells	0.631	0.00847	#NUM!	CCK
MSP-RON Signaling In Macrophages Pathway	0.629	0.0084	#NUM!	FOS
Renin-Angiotensin Signaling	0.622	0.00826	#NUM!	FOS
LXR/RXR Activation	0.616	0.00813	#NUM!	TTR
FXR/RXR Activation	0.607	0.00794	#NUM!	TTR
14-3-3-mediated Signaling	0.604	0.00787	#NUM!	FOS
S100 Family Signaling Pathway	0.602	0.00389	#NUM!	ADRA1D,FOS,P2RY1
G Beta Gamma Signaling	0.599	0.00775	#NUM!	KCNJ6
HGF Signaling	0.59	0.00758	#NUM!	FOS
Ferroptosis Signaling Pathway	0.59	0.00758	#NUM!	HSPB1
Reelin Signaling in Neurons	0.573	0.00725	#NUM!	PDK4
Adipogenesis pathway	0.57	0.00719	#NUM!	EGR2
MSP-RON Signaling In Cancer Cells Pathway	0.567	0.00714	#NUM!	FOS
Role Of Chondrocytes In Rheumatoid Arthritis Signaling Pathway	0.565	0.00709	#NUM!	FOS
Apelin Endothelial Signaling Pathway	0.565	0.00709	#NUM!	FOS
Endocannabinoid Neuronal Synapse Pathway	0.545	0.00671	#NUM!	KCNJ6
NAD Signaling Pathway	0.539	0.00662	#NUM!	OXT
IL-10 Signaling	0.533	0.00649	#NUM!	FOS
Relaxin Signaling	0.53	0.00645	#NUM!	FOS
eNOS Signaling	0.527	0.00641	#NUM!	HSPA1A/HSPA1B
Inhibition of ARE-Mediated mRNA Degradation Pathway	0.514	0.00617	#NUM!	POMC
HMGB1 Signaling	0.503	0.00599	#NUM!	FOS
CXCR4 Signaling	0.502	0.00595	#NUM!	FOS
Ribonucleotide Reductase Signaling Pathway	0.496	0.00588	#NUM!	FOS
Gαq Signaling	0.496	0.00588	#NUM!	ADRA1D
Erythropoietin Signaling Pathway	0.483	0.00565	#NUM!	FOS
Tight Junction Signaling	0.479	0.00559	#NUM!	FOS
Tumor Microenvironment Pathway	0.479	0.00559	#NUM!	FOS
IL-33 Signaling Pathway	0.465	0.00538	#NUM!	FOS
Dopamine-DARPP32 Feedback in cAMP Signaling	0.465	0.00538	#NUM!	KCNJ6
IL-17 Signaling	0.463	0.00535	#NUM!	FOS
GNRH Signaling	0.456	0.00524	#NUM!	FOS
Production of Nitric Oxide and Reactive Oxygen Species in Macrophages	0.456	0.00524	#NUM!	FOS
Regulation Of The Epithelial Mesenchymal Transition By Growth Factors Pathway	0.453	0.00521	#NUM!	FOS
Endothelin-1 Signaling	0.45	0.00515	#NUM!	FOS
Natural Killer Cell Signaling	0.444	0.00505	#NUM!	HSPA1A/HSPA1B
Oxytocin In Brain Signaling Pathway	0.441	0.00503	#NUM!	OXT
Adrenomedullin signaling pathway	0.441	0.00503	#NUM!	FOS
ID1 Signaling Pathway	0.438	0.00498	#NUM!	BHLHE22
Human Embryonic Stem Cell Pluripotency	0.438	0.00498	#NUM!	KLF4
ILK Signaling	0.438	0.00498	#NUM!	FOS
CDX Gastrointestinal Cancer Signaling Pathway	0.437	0.00495	#NUM!	FOS
Gustation Pathway	0.434	0.00493	#NUM!	P2RY1
Coronavirus Pathogenesis Pathway	0.433	0.0049	#NUM!	FOS
RAR Activation	0.431	0.00488	#NUM!	FOS
CDC42 Signaling	0.429	0.00347	#NUM!	FOS,RT1-M6-1/RT1-M6-2
HIF1α Signaling	0.426	0.00481	#NUM!	HSPA1A/HSPA1B
IL-8 Signaling	0.423	0.00476	#NUM!	FOS
Autophagy	0.413	0.00463	#NUM!	FOS
Breast Cancer Regulation by Stathmin1	0.412	0.00337	#NUM!	ADRA1D,P2RY1
Calcium Signaling	0.407	0.00455	#NUM!	PNCK
CREB Signaling in Neurons	0.401	0.00329	#NUM!	ADRA1D,P2RY1
CTLA4 Signaling in Cytotoxic T Lymphocytes	0.4	0.00329	#NUM!	FOS,RT1-M6-1/RT1-M6-2
HER-2 Signaling in Breast Cancer	0.397	0.00441	#NUM!	FOS
Role of Osteoblasts, Osteoclasts and Chondrocytes in Rheumatoid Arthritis	0.395	0.00439	#NUM!	FOS
T Cell Receptor Signaling	0.394	0.00325	#NUM!	FOS,RT1-M6-1/RT1-M6-2
IL-12 Signaling and Production in Macrophages	0.384	0.00424	#NUM!	FOS
FAK Signaling	0.381	0.00288	#NUM!	ADRA1D,FOS,P2RY1
Systemic Lupus Erythematosus In T Cell Signaling Pathway	0.372	0.00311	#NUM!	FOS,RT1-M6-1/RT1-M6-2
Wound Healing Signaling Pathway	0.363	0.00397	#NUM!	FOS
Signaling by Rho Family GTPases	0.344	0.00375	#NUM!	FOS
Circadian Rhythm Signaling	0.343	0.00373	#NUM!	GRP
Colorectal Cancer Metastasis Signaling	0.339	0.00369	#NUM!	FOS
Phagosome Formation	0.333	0.00288	#NUM!	ADRA1D,P2RY1
Huntington's Disease Signaling	0.325	0.00353	#NUM!	HSPA1A/HSPA1B
Senescence Pathway	0.308	0.00334	#NUM!	PDK4
Role Of Osteoclasts In Rheumatoid Arthritis Signaling Pathway	0.298	0.00324	#NUM!	FOS
Pulmonary Fibrosis Idiopathic Signaling Pathway	0.282	0.00307	#NUM!	FOS
Role of Macrophages, Fibroblasts and Endothelial Cells in Rheumatoid Arthritis	0.277	0.00301	#NUM!	FOS
Pathogen Induced Cytokine Storm Signaling Pathway	0.245	0.0027	#NUM!	FOS
Estrogen Receptor Signaling	0.219	0.00244	#NUM!	FOS
Hepatic Fibrosis Signaling Pathway	0.21	0.00236	#NUM!	FOS
Axonal Guidance Signaling	0	0.00196	#NUM!	ROBO3
Chaperone Mediated Autophagy Signaling Pathway	0	0.00156	#NUM!	HSPA1A/HSPA1B
Role of NFAT in Regulation of the Immune Response	0	0.000964	#NUM!	FOS
CCR5 Signaling in Macrophages	0	0.002	#NUM!	FOS
CD28 Signaling in T Helper Cells	0	0.00193	#NUM!	FOS
Molecular Mechanisms of Cancer	0	0.00222	#NUM!	FOS
Allograft Rejection Signaling	0	0.00205	#NUM!	RT1-M6-1/RT1-M6-2
Systemic Lupus Erythematosus Signaling	0	0.000936	#NUM!	FOS
Regulation of IL-2 Expression in Activated and Anergic T Lymphocytes	0	0.00216	#NUM!	FOS
NUR77 Signaling in T Lymphocytes	0	0.00195	#NUM!	RT1-M6-1/RT1-M6-2
PKCθ Signaling in T Lymphocytes	0	0.00179	#NUM!	FOS
OX40 Signaling Pathway	0	0.00209	#NUM!	RT1-M6-1/RT1-M6-2
PI3K Signaling in B Lymphocytes	0	0.00169	#NUM!	FOS
TEC Kinase Signaling	0	0.00173	#NUM!	FOS
T Cell Exhaustion Signaling Pathway	0	0.00176	#NUM!	FOS
Systemic Lupus Erythematosus In B Cell Signaling Pathway	0	0.00138	#NUM!	FOS

## Sheet: HIV vs. HIV+PSU
HIV vs. HIV+PSU
© 2000-2023 QIAGEN. All rights reserved.
Ingenuity Canonical Pathways	-log(p-value)	Ratio	z-score	Molecules
Dilated Cardiomyopathy Signaling Pathway	7.25	0.0733	1.265	ACTC1,ACTG2,ADCY8,BAG3,DES,MYH6,MYL2,MYL3,SCN5A,TNNC1,TNNT2
Tight Junction Signaling	5.56	0.0559	#NUM!	ACTC1,ACTG2,FOS,MYH6,MYL2,MYL3,NECTIN1,PTEN,REL,STX1A
Pulmonary Fibrosis Idiopathic Signaling Pathway	5.41	0.0399	-2.111	ACTC1,ACTG2,COL1A1,COL1A2,COL23A1,COL3A1,COL6A3,FOS,PTEN,REL,WNT4,WNT6,WNT9B
Hepatic Fibrosis / Hepatic Stellate Cell Activation	5.25	0.0515	#NUM!	COL1A1,COL1A2,COL23A1,COL3A1,COL6A3,IGF2,MYH6,MYL2,MYL3,REL
G-Protein Coupled Receptor Signaling	5.13	0.027	-1.606	ADCY8,ADGRA1,ADRA2A,APLNR,CMKLR1,CRHR2,DUSP1,FOS,GPR63,HCRTR1,HTR1B,MYL2,MYL3,NFKBIA,P2RY1,REL,RGS2,SSTR3,TRHR
HOTAIR Regulatory Pathway	5.01	0.0552	-2.646	COL1A1,COL1A2,COL3A1,NFKBIA,PTEN,REL,WNT4,WNT6,WNT9B
Calcium Signaling	4.77	0.0455	-2	ACTC1,ATP2B4,CHRNA4,MYH6,MYL2,MYL3,PNCK,TNNC1,TNNT2,TRPC6
IL-12 Signaling and Production in Macrophages	4.51	0.0424	-1.897	ADRA2A,ALOX15,CEBPB,COL1A1,COL1A2,COL3A1,FOS,PRL,REL,TLR2
ILK Signaling	4.29	0.0448	-2.121	ACTC1,ACTG2,FOS,Irs4,MYH6,MYL2,MYL3,PTEN,REL
Hepatic Fibrosis Signaling Pathway	4.22	0.0307	-2.309	CEBPB,COL1A1,COL1A2,COL3A1,FOS,MYL2,MYL3,NFKBIA,PTEN,REL,WNT4,WNT6,WNT9B
Apelin Liver Signaling Pathway	4.15	0.148	-2	APLNR,COL1A1,COL1A2,COL3A1
S100 Family Signaling Pathway	4.05	0.0233	-1.886	ADGRA1,ADRA2A,APLNR,BCL3,CMKLR1,CRHR2,FOS,GPR63,HCRTR1,HTR1B,NTF3,P2RY1,PLAT,SSTR3,TRHR,WNT4,WNT6,WNT9B
Death Receptor Signaling	3.81	0.0625	-1.342	ACTC1,ACTG2,HSPB1,NFKBIA,REL,TIPARP
Phagosome Formation	3.59	0.023	-2	ADGRA1,ADRA2A,APLNR,CMKLR1,CRHR2,GPR63,HCRTR1,HMOX1,HTR1B,MYH6,MYL2,MYL3,P2RY1,SSTR3,TLR2,TRHR
Cellular Effects of Sildenafil (Viagra)	3.56	0.0467	#NUM!	ACTC1,ACTG2,ADCY8,MYH6,MYL2,MYL3,NPPA
IL-17A Signaling in Fibroblasts	3.56	0.105	#NUM!	CEBPB,FOS,NFKBIA,REL
Macrophage Alternative Activation Signaling Pathway	3.51	0.0396	0.707	ALOX15,CEBPB,CXCL13,DUSP1,FOS,KLF4,NFKBIA,REL
Factors Promoting Cardiogenesis in Vertebrates	3.51	0.0458	-2.646	MYH6,MYL2,NPPA,SCN5A,WNT4,WNT6,WNT9B
IL-10 Signaling	3.49	0.0455	-0.378	BCL3,DDIT4,DUSP1,FOS,HMOX1,NFKBIA,REL
Intrinsic Prothrombin Activation Pathway	3.39	0.0952	-1	COL1A1,COL1A2,COL3A1,KLK7
RHOA Signaling	3.21	0.0484	-1.342	ACTC1,ACTG2,CDC42EP3,MYL2,MYL3,NRP2
IL-6 Signaling	3.12	0.0465	1.342	CEBPB,COL1A1,FOS,HSPB1,NFKBIA,REL
NRF2-mediated Oxidative Stress Response	3.06	0.0338	1	ACTC1,ACTG2,DNAJB1,FOS,GSTM1,HMOX1,JUNB,MAFF
Wound Healing Signaling Pathway	2.89	0.0317	-1.414	CEBPB,COL1A1,COL1A2,COL23A1,COL3A1,COL6A3,FOS,NFKBIA
MSP-RON Signaling Pathway	2.85	0.069	#NUM!	ACTC1,ACTG2,KLK7,TLR2
Neuroinflammation Signaling Pathway	2.84	0.0284	0	CALB2,FOS,GABRG3,GABRQ,HMOX1,NTF3,REL,SLC6A13,TLR2
Human Embryonic Stem Cell Pluripotency	2.81	0.0348	-0.378	INHBA,KLF2,KLF4,NTF3,WNT4,WNT6,WNT9B
CDX Gastrointestinal Cancer Signaling Pathway	2.8	0.0347	2.449	FOS,KLF5,PTEN,REL,WNT4,WNT6,WNT9B
PCP (Planar Cell Polarity) Pathway	2.8	0.0667	-1	JUNB,WNT4,WNT6,WNT9B
Role of JAK2 in Hormone-like Cytokine Signaling	2.74	0.0645	-1	FOS,Irs4,POMC,PRL
Signaling by Rho Family GTPases	2.73	0.03	-1.134	ACTC1,ACTG2,CDC42EP3,DES,FOS,MYL2,MYL3,REL
TNFR2 Signaling	2.62	0.0938	#NUM!	FOS,NFKBIA,REL
Chronic Myeloid Leukemia Signaling	2.62	0.0288	-0.707	ALOX15,FOS,KLF4,PTEN,REL,WNT4,WNT6,WNT9B
Oxytocin Signaling Pathway	2.58	0.0284	0	ATP2B4,FOS,HSPB1,MYH6,MYL2,MYL3,NPPA,REL
Growth Hormone Signaling	2.53	0.0563	#NUM!	CSHL1,FOS,IGF2,PRL
Role of Osteoblasts, Osteoclasts and Chondrocytes in Rheumatoid Arthritis	2.51	0.0307	#NUM!	COL1A1,FOS,FRZB,NFKBIA,WNT4,WNT6,WNT9B
cAMP-mediated signaling	2.42	0.0297	-1.89	ADCY8,ADRA2A,APLNR,DUSP1,HTR1B,RGS2,SSTR3
Tumor Microenvironment Pathway	2.4	0.0335	-1	COL1A1,COL1A2,COL3A1,FOS,IGF2,REL
Toll-like Receptor Signaling	2.38	0.0513	#NUM!	FOS,NFKBIA,REL,TLR2
GP6 Signaling Pathway	2.37	0.0394	-2.236	COL1A1,COL1A2,COL23A1,COL3A1,COL6A3
Role of JAK family kinases in IL-6-type Cytokine Signaling	2.36	0.0506	0	FOS,JUNB,POMC,VIP
Role Of Osteoclasts In Rheumatoid Arthritis Signaling Pathway	2.34	0.0259	-0.707	COL1A1,COL1A2,COL23A1,COL3A1,COL6A3,FOS,FRZB,NFKBIA
CREB Signaling in Neurons	2.29	0.0198	-1.732	ADCY8,ADGRA1,ADRA2A,APLNR,CMKLR1,CRHR2,GPR63,HCRTR1,HTR1B,P2RY1,SSTR3,TRHR
April Mediated Signaling	2.29	0.0714	#NUM!	FOS,NFKBIA,REL
Atherosclerosis Signaling	2.28	0.0376	#NUM!	ALOX15,COL1A1,COL1A2,COL3A1,REL
B Cell Activating Factor Signaling	2.26	0.0698	#NUM!	FOS,NFKBIA,REL
SNARE Signaling Pathway	2.24	0.0368	-2.236	ADCY8,MYH6,MYL2,MYL3,STX1A
Role of PKR in Interferon Induction and Antiviral Response	2.24	0.0368	0	ATF3,FOS,HSPA1A/HSPA1B,NFKBIA,REL
MIF Regulation of Innate Immunity	2.23	0.0682	#NUM!	FOS,NFKBIA,REL
Regulation Of The Epithelial Mesenchymal Transition In Development Pathway	2.21	0.046	#NUM!	REL,WNT4,WNT6,WNT9B
Natural Killer Cell Signaling	2.19	0.0303	1.342	COL1A1,COL1A2,COL3A1,HSPA1A/HSPA1B,REL,ZAP70
Gαi Signaling	2.19	0.0357	-0.447	ADCY8,ADRA2A,APLNR,HTR1B,SSTR3
Apelin Endothelial Signaling Pathway	2.18	0.0355	#NUM!	ADCY8,APLNR,FOS,KLF2,REL
Role of Macrophages, Fibroblasts and Endothelial Cells in Rheumatoid Arthritis	2.16	0.0241	#NUM!	CEBPB,FOS,FRZB,NFKBIA,TLR2,WNT4,WNT6,WNT9B
ID1 Signaling Pathway	2.16	0.0299	-1.633	ATF3,BCL3,BHLHE22,CHRNA4,IGF2,PTEN
iNOS Signaling	2.15	0.0638	#NUM!	FOS,NFKBIA,REL
Circadian Rhythm Signaling	2.13	0.0261	#NUM!	ADCY8,CIART,CRY1,PER2,PTGDS,TRPC6,VIP
Colorectal Cancer Metastasis Signaling	2.1	0.0258	-1.633	ADCY8,FOS,REL,TLR2,WNT4,WNT6,WNT9B
Fcγ Receptor-mediated Phagocytosis in Macrophages and Monocytes	2.1	0.0426	0	ACTC1,ACTG2,HMOX1,PTEN
Agranulocyte Adhesion and Diapedesis	2.07	0.0286	#NUM!	ACTC1,ACTG2,CXCL13,MYH6,MYL2,MYL3
IL-1 Signaling	2.06	0.0417	#NUM!	ADCY8,FOS,NFKBIA,REL
TNFR1 Signaling	2.05	0.0588	#NUM!	FOS,NFKBIA,REL
Corticotropin Releasing Hormone Signaling	2.04	0.0329	-0.447	ADCY8,CRHR2,FOS,NR4A1,POMC
Opioid Signaling Pathway	2.03	0.025	-0.447	ADCY8,EGR4,FOS,FOSB,NFKBIA,PNOC,POMC
Apelin Cardiomyocyte Signaling Pathway	2.02	0.0404	-2	APLNR,MYL2,MYL3,SLC9A2
Breast Cancer Regulation by Stathmin1	1.94	0.0185	-1.508	ADGRA1,ADRA2A,APLNR,CMKLR1,CRHR2,GPR63,HCRTR1,HTR1B,P2RY1,SSTR3,TRHR
CD27 Signaling in Lymphocytes	1.92	0.0526	#NUM!	FOS,NFKBIA,REL
HER-2 Signaling in Breast Cancer	1.91	0.0264	0.816	COX6A2,Cox8b,FOS,NFKBIA,PTEN,REL
Pathogen Induced Cytokine Storm Signaling Pathway	1.89	0.0216	-2.121	COL1A1,COL1A2,COL23A1,COL3A1,COL6A3,CXCL13,FOS,TLR2
FAK Signaling	1.85	0.0154	-2	ADGRA1,ADRA2A,APLNR,CMKLR1,COL1A1,COL1A2,COL3A1,CRHR2,FOS,GPR63,HCRTR1,HTR1B,P2RY1,PTEN,SSTR3,TRHR
Glioblastoma Multiforme Signaling	1.84	0.0292	-2	IGF2,PTEN,WNT4,WNT6,WNT9B
Osteoarthritis Pathway	1.84	0.0254	0.447	CEBPB,DDIT4,FRZB,GREM1,REL,TLR2
WNT/β-catenin Signaling	1.81	0.0287	-0.447	FRZB,SOX18,WNT4,WNT6,WNT9B
Regulation of Actin-based Motility by Rho	1.8	0.0348	-2	ACTC1,ACTG2,MYL2,MYL3
CD40 Signaling	1.73	0.0448	#NUM!	FOS,NFKBIA,REL
IL-17A Signaling in Airway Cells	1.73	0.0448	#NUM!	NFKBIA,PTEN,REL
Acute Phase Response Signaling	1.71	0.027	#NUM!	CEBPB,FOS,HMOX1,NFKBIA,REL
Myelination Signaling Pathway	1.69	0.0214	-1.134	EGR2,FOS,NTF3,PTEN,WNT4,WNT6,WNT9B
Cardiomyocyte Differentiation via BMP Receptors	1.67	0.0741	#NUM!	MYL2,NPPA
NOD1/2 Signaling Pathway	1.67	0.0265	-0.447	CXCL13,FOS,HSPA1A/HSPA1B,NFKBIA,TLR2
Hepatic Cholestasis	1.65	0.0262	#NUM!	ADCY8,CYP27A1,NFKBIA,REL,SLC22A6
Basal Cell Carcinoma Signaling	1.65	0.0417	#NUM!	WNT4,WNT6,WNT9B
Protein Kinase A Signaling	1.65	0.0195	-1	ADCY8,DUSP1,MYL2,MYL3,NFKBIA,PTEN,PTPN3,REL
Glucocorticoid Receptor Signaling	1.61	0.0172	#NUM!	DUSP1,FOS,HSPA1A/HSPA1B,NFKBIA,NPPA,PCK1,PDK4,POMC,PRL,TLR2
Tyrosine Biosynthesis IV	1.61	0.333	#NUM!	PAH
GABA Receptor Signaling	1.6	0.0303	#NUM!	ADCY8,GABRG3,GABRQ,SLC6A13
Gα12/13 Signaling	1.59	0.0301	#NUM!	MYL2,MYL3,NFKBIA,REL
P2Y Purigenic Receptor Signaling Pathway	1.59	0.0301	#NUM!	ADCY8,FOS,P2RY1,REL
Pulmonary Healing Signaling Pathway	1.59	0.0251	-1.342	NFKBIA,TLR2,WNT4,WNT6,WNT9B
VDR/RXR Activation	1.56	0.0385	#NUM!	CEBPB,CST6,KLF4
Role of WNT/GSK-3β Signaling in the Pathogenesis of Influenza	1.56	0.0385	#NUM!	WNT4,WNT6,WNT9B
Gustation Pathway	1.55	0.0246	-0.447	ADCY8,GABRG3,GABRQ,P2RY1,SCN5A
Thyroid Cancer Signaling	1.55	0.038	#NUM!	FOS,NTF3,PTEN
RAR Activation	1.54	0.0244	#NUM!	ADCY8,DUSP1,FOS,PTEN,REL
Adipogenesis pathway	1.53	0.0288	1	CEBPB,EGR2,KLF5,PER2
MSP-RON Signaling In Cancer Cells Pathway	1.52	0.0286	#NUM!	FOS,KLK7,NFKBIA,REL
JAK/STAT Signaling	1.5	0.0366	#NUM!	CEBPB,FOS,REL
BEX2 Signaling Pathway	1.5	0.0366	#NUM!	NFKBIA,PTEN,REL
4-1BB Signaling in T Lymphocytes	1.49	0.0588	#NUM!	NFKBIA,REL
Heme Degradation	1.48	0.25	#NUM!	HMOX1
Phenylalanine Degradation I (Aerobic)	1.48	0.25	#NUM!	PAH
TR/RXR Activation	1.48	0.0357	#NUM!	BCL3,COL6A3,PCK1
LPS-stimulated MAPK Signaling	1.46	0.0353	#NUM!	FOS,NFKBIA,REL
IL-9 Signaling	1.46	0.0571	#NUM!	BCL3,REL
Molecular Mechanisms of Cancer	1.45	0.0178	#NUM!	ADCY8,FOS,NFKBIA,RASGRF2,REL,WNT4,WNT6,WNT9B
MIF-mediated Glucocorticoid Regulation	1.44	0.0556	#NUM!	NFKBIA,REL
Xenobiotic Metabolism AHR Signaling Pathway	1.44	0.0345	#NUM!	GSTM1,REL,UGT1A3
RHOGDI Signaling	1.42	0.0227	2	ACTC1,ACTG2,MYH6,MYL2,MYL3
TWEAK Signaling	1.42	0.0541	#NUM!	NFKBIA,REL
Cardiac Hypertrophy Signaling (Enhanced)	1.41	0.0166	-1.414	ADCY8,ADRA2A,HSPB1,NPPA,PTEN,REL,WNT4,WNT6,WNT9B
Type II Diabetes Mellitus Signaling	1.4	0.0261	#NUM!	CEBPB,Irs4,NFKBIA,REL
Unfolded protein response	1.4	0.0333	#NUM!	CEBPB,DNAJB1,HSPA1A/HSPA1B
Crosstalk between Dendritic Cells and Natural Killer Cells	1.39	0.033	#NUM!	ACTC1,ACTG2,REL
RANK Signaling in Osteoclasts	1.39	0.033	#NUM!	FOS,NFKBIA,REL
BMP signaling pathway	1.39	0.033	#NUM!	FST,GREM1,REL
Tetrapyrrole Biosynthesis II	1.39	0.2	#NUM!	ALAS2
Relaxin Signaling	1.39	0.0258	#NUM!	ADCY8,FOS,NFKBIA,REL
Apelin Adipocyte Signaling Pathway	1.38	0.0326	#NUM!	ADCY8,APLNR,GSTM1
Ovarian Cancer Signaling	1.36	0.0253	#NUM!	PTEN,WNT4,WNT6,WNT9B
Aryl Hydrocarbon Receptor Signaling	1.35	0.0252	#NUM!	FOS,GSTM1,HSPB1,REL
Prolactin Signaling	1.34	0.0316	#NUM!	CEBPB,FOS,PRL
Mechanisms of Viral Exit from Host Cells	1.34	0.0488	#NUM!	ACTC1,ACTG2
Small Cell Lung Cancer Signaling	1.33	0.0312	#NUM!	NFKBIA,PTEN,REL
Rapoport-Luebering Glycolytic Shunt	1.31	0.167	#NUM!	PGAM2
CXCR4 Signaling	1.28	0.0238	#NUM!	ADCY8,FOS,MYL2,MYL3
Role Of Osteoblasts In Rheumatoid Arthritis Signaling Pathway	1.27	0.0205	1.342	COL1A1,FRZB,WNT4,WNT6,WNT9B
Actin Cytoskeleton Signaling	1.27	0.0205	-2.236	ACTC1,ACTG2,MYH6,MYL2,MYL3
Serotonin Receptor Signaling	1.27	0.0444	#NUM!	ADCY8,HTR1B
Gαq Signaling	1.26	0.0235	#NUM!	HMOX1,NFKBIA,REL,RGS2
Aldosterone Signaling in Epithelial Cells	1.25	0.0233	#NUM!	DNAJB1,DUSP1,HSPA1A/HSPA1B,HSPB1
Estrogen Receptor Signaling	1.25	0.0171	-1.633	ADCY8,FOS,IGF2,MYL2,MYL3,PTEN,REL
Role of RIG1-like Receptors in Antiviral Innate Immunity	1.25	0.0435	#NUM!	NFKBIA,REL
Apelin Pancreas Signaling Pathway	1.25	0.0435	#NUM!	APLNR,REL
IL-23 Signaling Pathway	1.25	0.0435	#NUM!	NFKBIA,REL
IGF-1 Signaling	1.24	0.0286	#NUM!	CCN1,FOS,IGFBP2
PPAR Signaling	1.22	0.028	#NUM!	FOS,NFKBIA,REL
Axonal Guidance Signaling	1.19	0.0157	#NUM!	ADAMTS2,MYL2,MYL3,NRP2,NTF3,WNT4,WNT6,WNT9B
FAT10 Cancer Signaling Pathway	1.18	0.04	#NUM!	NFKBIA,REL
Cardiac Hypertrophy Signaling	1.17	0.0192	-1.342	ADCY8,ADRA2A,HSPB1,MYL2,MYL3
Prostate Cancer Signaling	1.15	0.0263	#NUM!	NFKBIA,PTEN,REL
Antioxidant Action of Vitamin C	1.15	0.0263	#NUM!	HMOX1,NFKBIA,REL
Heme Biosynthesis II	1.14	0.111	#NUM!	ALAS2
IL-13 Signaling Pathway	1.13	0.0259	#NUM!	ALOX15,DUSP1,FOSL2
Production of Nitric Oxide and Reactive Oxygen Species in Macrophages	1.12	0.0209	#NUM!	FOS,NFKBIA,REL,TLR2
MSP-RON Signaling In Macrophages Pathway	1.11	0.0252	#NUM!	FOS,KLK7,REL
CSDE1 Signaling Pathway	1.1	0.0357	#NUM!	FOS,PTEN
Prostanoid Biosynthesis	1.09	0.1	#NUM!	PTGDS
Calcium Transport I	1.09	0.1	#NUM!	ATP2B4
Renin-Angiotensin Signaling	1.09	0.0248	#NUM!	ADCY8,FOS,REL
Neuroprotective Role of THOP1 in Alzheimer's Disease	1.09	0.0248	#NUM!	GZMM,KLK7,PNOC
PPARα/RXRα Activation	1.09	0.0205	#NUM!	ADCY8,BCL3,NFKBIA,REL
Regulation of the Epithelial-Mesenchymal Transition Pathway	1.09	0.0205	#NUM!	REL,WNT4,WNT6,WNT9B
Role of IL-17A in Arthritis	1.09	0.0351	#NUM!	NFKBIA,REL
Role of NANOG in Mammalian Embryonic Stem Cell Pluripotency	1.07	0.0242	#NUM!	WNT4,WNT6,WNT9B
Adrenomedullin signaling pathway	1.07	0.0201	#NUM!	ADCY8,CEBPB,FOS,REL
Polyamine Regulation in Colon Cancer	1.06	0.0339	#NUM!	ALOX15,FOS
Sertoli Cell-Sertoli Cell Junction Signaling	1.03	0.0194	#NUM!	ACTC1,ACTG2,NECTIN1,PTEN
Xenobiotic Metabolism Signaling	1.01	0.0172	#NUM!	FMO2,GSTM1,HMOX1,REL,UGT1A3
Ferroptosis Signaling Pathway	1.01	0.0227	#NUM!	ALOX15,HMOX1,HSPB1
IL-8 Signaling	1	0.019	#NUM!	FOS,HMOX1,MYL2,NFKBIA
Integrin Signaling	0.991	0.0189	-2	ACTC1,ACTG2,MYL2,PTEN
Activation of IRF by Cytosolic Pattern Recognition Receptors	0.987	0.0308	#NUM!	NFKBIA,REL
Induction of Apoptosis by HIV1	0.987	0.0308	#NUM!	NFKBIA,REL
Role of PI3K/AKT Signaling in the Pathogenesis of Influenza	0.979	0.0303	#NUM!	NFKBIA,REL
Nicotine Degradation II	0.979	0.0303	#NUM!	FMO2,UGT1A3
Senescence Pathway	0.975	0.0167	-0.447	ATF3,CEBPB,PDK4,PTEN,TLR2
White Adipose Tissue Browning Pathway	0.963	0.0217	#NUM!	ADCY8,CEBPB,NPPA
Remodeling of Epithelial Adherens Junctions	0.955	0.0294	#NUM!	ACTC1,ACTG2
Agrin Interactions at Neuromuscular Junction	0.947	0.029	#NUM!	ACTC1,ACTG2
Role Of Chondrocytes In Rheumatoid Arthritis Signaling Pathway	0.943	0.0213	#NUM!	CEBPB,FOS,TLR2
Eicosanoid Signaling	0.936	0.0286	#NUM!	ALOX15,PTGDS
Choline Biosynthesis III	0.928	0.0667	#NUM!	HMOX1
Xenobiotic Metabolism General Signaling Pathway	0.928	0.021	#NUM!	GSTM1,HMOX1,UGT1A3
Thrombin Signaling	0.921	0.0178	#NUM!	ADCY8,MYL2,MYL3,REL
Neurovascular Coupling Signaling Pathway	0.886	0.0172	0	GABRG3,GABRQ,KCNJ16,P2RY1
Caveolar-mediated Endocytosis Signaling	0.886	0.0267	#NUM!	ACTC1,ACTG2
GPCR-Mediated Integration of Enteroendocrine Signaling Exemplified by an L Cell	0.886	0.0267	#NUM!	ADCY8,VIP
Semaphorin Neuronal Repulsive Signaling Pathway	0.883	0.02	#NUM!	MYL2,MYL3,NRP2
Neutrophil Extracellular Trap Signaling Pathway	0.876	0.0145	1.633	COL1A1,COL1A2,COL23A1,COL3A1,COL6A3,TLR2
Angiopoietin Signaling	0.876	0.0263	#NUM!	NFKBIA,REL
Leptin Signaling in Obesity	0.876	0.0263	#NUM!	ADCY8,POMC
D-myo-inositol (1,3,4)-trisphosphate Biosynthesis	0.876	0.0588	#NUM!	PTEN
Hypoxia Signaling in the Cardiovascular System	0.876	0.0263	#NUM!	NFKBIA,PTEN
TREM1 Signaling	0.87	0.026	#NUM!	REL,TLR2
NF-κB Activation by Viruses	0.86	0.0256	#NUM!	NFKBIA,REL
Neurotrophin/TRK Signaling	0.86	0.0256	#NUM!	FOS,NTF3
Bile Acid Biosynthesis, Neutral Pathway	0.854	0.0556	#NUM!	CYP27A1
eNOS Signaling	0.848	0.0192	#NUM!	ADCY8,CHRNA4,HSPA1A/HSPA1B
Dopamine Receptor Signaling	0.842	0.025	#NUM!	ADCY8,PRL
Estrogen-Dependent Breast Cancer Signaling	0.833	0.0247	#NUM!	FOS,REL
Chemokine Signaling	0.833	0.0247	#NUM!	FOS,MYL2
VEGF Family Ligand-Receptor Interactions	0.807	0.0238	#NUM!	FOS,NRP2
PEDF Signaling	0.807	0.0238	#NUM!	NFKBIA,REL
BAG2 Signaling Pathway	0.807	0.0238	#NUM!	HSPA1A/HSPA1B,REL
HMGB1 Signaling	0.785	0.018	#NUM!	FOS,PLAT,REL
Superpathway of D-myo-inositol (1,4,5)-trisphosphate Metabolism	0.775	0.0455	#NUM!	PTEN
Immunogenic Cell Death Signaling Pathway	0.762	0.0222	#NUM!	GZMM,HSPA1A/HSPA1B
Pyrimidine Deoxyribonucleotides De Novo Biosynthesis I	0.757	0.0435	#NUM!	PCK1
Apelin Cardiac Fibroblast Signaling Pathway	0.757	0.0435	#NUM!	APLNR
Ceramide Signaling	0.754	0.022	#NUM!	FOS,REL
Tumoricidal Function of Hepatic Natural Killer Cells	0.74	0.0417	#NUM!	LYVE1
Erythropoietin Signaling Pathway	0.735	0.0169	#NUM!	FOS,NFKBIA,REL
TGF-β Signaling	0.719	0.0208	#NUM!	FOS,INHBA
Insulin Secretion Signaling Pathway	0.714	0.0147	#NUM!	ADCY8,CSHL1,PRL,STX1A
IL-17A Signaling in Gastric Cells	0.708	0.0385	#NUM!	FOS
Role of JAK1, JAK2 and TYK2 in Interferon Signaling	0.708	0.0385	#NUM!	REL
Melanocyte Development and Pigmentation Signaling	0.706	0.0204	#NUM!	ADCY8,POMC
UVA-Induced MAPK Signaling	0.706	0.0204	#NUM!	FOS,TIPARP
VEGF Signaling	0.699	0.0202	#NUM!	ACTC1,ACTG2
Glycolysis I	0.693	0.037	#NUM!	PGAM2
Gluconeogenesis I	0.693	0.037	#NUM!	PGAM2
Pregnenolone Biosynthesis	0.693	0.037	#NUM!	CYP27A1
Sumoylation Pathway	0.674	0.0194	#NUM!	FOS,NFKBIA
GNRH Signaling	0.67	0.0157	#NUM!	ADCY8,FOS,REL
Xenobiotic Metabolism CAR Signaling Pathway	0.67	0.0157	#NUM!	FMO2,GSTM1,UGT1A3
Glutathione Redox Reactions I	0.666	0.0345	#NUM!	GSTM1
Apoptosis Signaling	0.666	0.0192	#NUM!	NFKBIA,REL
Endothelin-1 Signaling	0.656	0.0155	#NUM!	ADCY8,FOS,HMOX1
Paxillin Signaling	0.648	0.0187	#NUM!	ACTC1,ACTG2
PD-1, PD-L1 cancer immunotherapy pathway	0.648	0.0187	#NUM!	PTEN,ZAP70
Gap Junction Signaling	0.638	0.0152	#NUM!	ACTC1,ACTG2,ADCY8
α-Adrenergic Signaling	0.636	0.0183	#NUM!	ADCY8,ADRA2A
PI3K/AKT Signaling	0.631	0.015	#NUM!	NFKBIA,PTEN,REL
Oxidative Phosphorylation	0.625	0.018	#NUM!	COX6A2,Cox8b
Coronavirus Pathogenesis Pathway	0.614	0.0147	#NUM!	FOS,NFKBIA,REL
CDK5 Signaling	0.604	0.0174	#NUM!	ADCY8,FOSB
HIF1α Signaling	0.599	0.0144	#NUM!	HMOX1,HSPA1A/HSPA1B,IGF2
Role of Tissue Factor in Cancer	0.599	0.0172	#NUM!	CCN1,PTEN
Coagulation System	0.595	0.0286	#NUM!	PLAT
PAK Signaling	0.592	0.0171	#NUM!	MYL2,MYL3
Virus Entry via Endocytic Pathways	0.587	0.0169	#NUM!	ACTC1,ACTG2
Interferon Signaling	0.583	0.0278	#NUM!	IFIT3
p38 MAPK Signaling	0.577	0.0167	#NUM!	DUSP1,HSPB1
Glutathione-mediated Detoxification	0.573	0.027	#NUM!	GSTM1
ERK/MAPK Signaling	0.573	0.014	#NUM!	DUSP1,FOS,HSPB1
Synaptogenesis Signaling Pathway	0.57	0.0127	-2	ADCY8,NECTIN1,STX1A,THBS2
Docosahexaenoic Acid (DHA) Signaling	0.564	0.0263	#NUM!	ALOX15
Cell Cycle Regulation by BTG Family Proteins	0.564	0.0263	#NUM!	BTG2
Pyrimidine Ribonucleotides Interconversion	0.564	0.0263	#NUM!	PCK1
LXR/RXR Activation	0.562	0.0163	#NUM!	REL,UGT1A3
IL-15 Production	0.562	0.0163	#NUM!	REL,ZAP70
Inhibition of Matrix Metalloproteases	0.554	0.0256	#NUM!	THBS2
Glioma Signaling	0.553	0.016	#NUM!	IGF2,PTEN
Multiple Sclerosis Signaling Pathway	0.548	0.0135	#NUM!	DUSP1,TIPARP,TLR2
Pancreatic Adenocarcinoma Signaling	0.548	0.0159	#NUM!	HMOX1,REL
Gαs Signaling	0.548	0.0159	#NUM!	ADCY8,RGS2
Thyroid Hormone Metabolism II (via Conjugation and/or Degradation)	0.545	0.025	#NUM!	UGT1A3
Pyrimidine Ribonucleotides De Novo Biosynthesis	0.536	0.0244	#NUM!	PCK1
EIF2 Signaling	0.53	0.0132	#NUM!	ACTC1,ACTG2,ATF3
fMLP Signaling in Neutrophils	0.524	0.0153	#NUM!	NFKBIA,REL
Coronavirus Replication Pathway	0.503	0.0222	#NUM!	BAG3
Iron homeostasis signaling pathway	0.495	0.0145	#NUM!	ALAS2,HMOX1
Role of IL-17F in Allergic Inflammatory Airway Diseases	0.487	0.0213	#NUM!	REL
Insulin Receptor Signaling	0.487	0.0143	#NUM!	Irs4,PTEN
Apelin Muscle Signaling Pathway	0.48	0.0208	#NUM!	APLNR
Melanoma Signaling	0.465	0.02	#NUM!	PTEN
UVC-Induced MAPK Signaling	0.458	0.0196	#NUM!	FOS
Endocannabinoid Cancer Inhibition Pathway	0.458	0.0136	#NUM!	ADCY8,ATF3
IL-4 Signaling	0.455	0.0104	-2.449	ALOX15,COL1A1,COL1A2,COL23A1,COL3A1,COL6A3
UVB-Induced MAPK Signaling	0.451	0.0192	#NUM!	FOS
LPS/IL-1 Mediated Inhibition of RXR Function	0.449	0.0118	#NUM!	FABP3,FMO2,GSTM1
NAD Signaling Pathway	0.444	0.0132	#NUM!	CEBPB,TIPARP
PTEN Signaling	0.444	0.0132	#NUM!	PTEN,REL
Lymphotoxin β Receptor Signaling	0.432	0.0182	#NUM!	NFKBIA
PI3K Signaling in B Lymphocytes	0.429	0.0102	1	ATF3,FOS,Irs4,NFKBIA,PTEN,REL
Role of Pattern Recognition Receptors in Recognition of Bacteria and Viruses	0.426	0.0128	#NUM!	REL,TLR2
EGF Signaling	0.426	0.0179	#NUM!	FOS
Epithelial Adherens Junction Signaling	0.423	0.0127	#NUM!	NECTIN1,PTEN
Dendritic Cell Maturation	0.421	0.0101	-0.816	COL1A1,COL1A2,COL3A1,NFKBIA,REL,TLR2
Nicotine Degradation III	0.415	0.0172	#NUM!	UGT1A3
Cancer Drug Resistance By Drug Efflux	0.415	0.0172	#NUM!	PTEN
Primary Immunodeficiency Signaling	0.409	0.0169	#NUM!	ZAP70
Endometrial Cancer Signaling	0.402	0.0167	#NUM!	PTEN
Retinoic acid Mediated Apoptosis Signaling	0.402	0.0167	#NUM!	TIPARP
GADD45 Signaling	0.402	0.0167	#NUM!	REL
SPINK1 Pancreatic Cancer Pathway	0.402	0.0167	#NUM!	KLK7
Protein Ubiquitination Pathway	0.399	0.011	#NUM!	DNAJB1,HSPA1A/HSPA1B,HSPB1
Melatonin Degradation I	0.391	0.0161	#NUM!	UGT1A3
IL-2 Signaling	0.391	0.0161	#NUM!	FOS
Thrombopoietin Signaling	0.386	0.0159	#NUM!	FOS
Androgen Signaling	0.384	0.0118	#NUM!	DNAJB1,REL
Ribonucleotide Reductase Signaling Pathway	0.381	0.0118	#NUM!	FOS,TIPARP
Germ Cell-Sertoli Cell Junction Signaling	0.381	0.0118	#NUM!	ACTC1,ACTG2
PXR/RXR Activation	0.377	0.0154	#NUM!	GSTM1
ERB2-ERBB3 Signaling	0.377	0.0154	#NUM!	PTEN
Huntington's Disease Signaling	0.376	0.0106	#NUM!	DNAJB1,HSPA1A/HSPA1B,STX1A
WNT/Ca+ pathway	0.372	0.0152	#NUM!	REL
Glutamate Receptor Signaling	0.372	0.0152	#NUM!	SLC17A6
Superpathway of Melatonin Degradation	0.367	0.0149	#NUM!	UGT1A3
Role of JAK1 and JAK3 in γc Cytokine Signaling	0.357	0.0145	#NUM!	Irs4
Phospholipases	0.357	0.0145	#NUM!	HMOX1
D-myo-inositol (1,4,5,6)-Tetrakisphosphate Biosynthesis	0.356	0.0112	#NUM!	DUSP1,PTEN
D-myo-inositol (3,4,5,6)-tetrakisphosphate Biosynthesis	0.356	0.0112	#NUM!	DUSP1,PTEN
Sirtuin Signaling Pathway	0.354	0.0102	#NUM!	PCK1,PGAM2,REL
Serotonin Degradation	0.348	0.0141	#NUM!	UGT1A3
IL-33 Signaling Pathway	0.336	0.0108	#NUM!	FOS,NFKBIA
Dopamine-DARPP32 Feedback in cAMP Signaling	0.336	0.0108	#NUM!	ADCY8,KCNJ16
ERK5 Signaling	0.334	0.0135	#NUM!	FOS
MicroRNA Biogenesis Signaling Pathway	0.333	0.0107	#NUM!	DNAJB1,HMOX1
IL-17 Signaling	0.333	0.0107	#NUM!	CEBPB,FOS
GDNF Family Ligand-Receptor Interactions	0.326	0.0132	#NUM!	FOS
3-phosphoinositide Degradation	0.323	0.0105	#NUM!	DUSP1,PTEN
Xenobiotic Metabolism PXR Signaling Pathway	0.321	0.0104	#NUM!	GSTM1,UGT1A3
Regulation Of The Epithelial Mesenchymal Transition By Growth Factors Pathway	0.321	0.0104	#NUM!	FOS,REL
Leukocyte Extravasation Signaling	0.319	0.0104	#NUM!	ACTC1,ACTG2
IL-3 Signaling	0.314	0.0127	#NUM!	FOS
Renal Cell Carcinoma Signaling	0.314	0.0127	#NUM!	FOS
Role of MAPK Signaling in Inhibiting the Pathogenesis of Influenza	0.314	0.0127	#NUM!	NFKBIA
D-myo-inositol-5-phosphate Metabolism	0.313	0.0103	#NUM!	DUSP1,PTEN
Oxytocin In Brain Signaling Pathway	0.305	0.0101	#NUM!	KCNJ13,RGS2
3-phosphoinositide Biosynthesis	0.291	0.00976	#NUM!	DUSP1,PTEN
Role of Hypercytokinemia/hyperchemokinemia in the Pathogenesis of Influenza	0.289	0.0116	#NUM!	IFIT3
PDGF Signaling	0.286	0.0115	#NUM!	FOS
Clathrin-mediated Endocytosis Signaling	0.284	0.00962	#NUM!	ACTC1,ACTG2
Acute Myeloid Leukemia Signaling	0.272	0.011	#NUM!	REL
mTOR Signaling	0.272	0.00935	#NUM!	DDIT4,HMOX1
Regulation of IL-2 Expression in Activated and Anergic T Lymphocytes	0.268	0.00866	1	FOS,NFKBIA,REL,ZAP70
Autophagy	0.268	0.00926	#NUM!	FOS,PTEN
Pyroptosis Signaling Pathway	0.266	0.0108	#NUM!	TLR2
ERBB Signaling	0.266	0.0108	#NUM!	FOS
Mitochondrial Dysfunction	0.258	0.0087	#NUM!	COX6A2,Cox8b,GSTM1
Salvage Pathways of Pyrimidine Ribonucleotides	0.254	0.0103	#NUM!	PCK1
p53 Signaling	0.251	0.0102	#NUM!	PTEN
ATM Signaling	0.246	0.01	#NUM!	NFKBIA
Neuropathic Pain Signaling In Dorsal Horn Neurons	0.243	0.0099	#NUM!	FOS
Superpathway of Inositol Phosphate Compounds	0.234	0.00855	#NUM!	DUSP1,PTEN
DNA Methylation and Transcriptional Repression Signaling	0.215	0.00893	#NUM!	CEBPB
Role of MAPK Signaling in Promoting the Pathogenesis of Influenza	0.21	0.00877	#NUM!	NFKBIA
Neuregulin Signaling	0.203	0.00855	#NUM!	PTEN
Airway Pathology in Chronic Obstructive Pulmonary Disease	0.201	0.00847	#NUM!	PTGDS
GPCR-Mediated Nutrient Sensing in Enteroendocrine Cells	0.201	0.00847	#NUM!	ADCY8
Cholecystokinin/Gastrin-mediated Signaling	0.199	0.0084	#NUM!	FOS
CLEAR Signaling Pathway	0	0.00702	#NUM!	DDIT4,TLR2
Macrophage Classical Activation Signaling Pathway	0	0.00529	#NUM!	NFKBIA
Synaptic Long Term Potentiation	0	0.00758	#NUM!	ADCY8
Chaperone Mediated Autophagy Signaling Pathway	0	0.00467	#NUM!	DNAJB1,HSPA1A/HSPA1B,NFKBIA
FXR/RXR Activation	0	0.00794	#NUM!	CYP27A1
14-3-3-mediated Signaling	0	0.00787	#NUM!	FOS
Role of NFAT in Regulation of the Immune Response	0	0.00386	#NUM!	FOS,NFKBIA,REL,ZAP70
CCR5 Signaling in Macrophages	0	0.002	#NUM!	FOS
Calcium-induced T Lymphocyte Apoptosis	0	0.00435	#NUM!	NR4A1,ZAP70
CTLA4 Signaling in Cytotoxic T Lymphocytes	0	0.00493	#NUM!	FOS,HMOX1,ZAP70
CD28 Signaling in T Helper Cells	0	0.00774	#NUM!	FOS,NFKBIA,REL,ZAP70
IL-15 Signaling	0	0.00189	#NUM!	REL
Reelin Signaling in Neurons	0	0.00725	#NUM!	PDK4
ICOS-ICOSL Signaling in T Helper Cells	0	0.00789	#NUM!	NFKBIA,PTEN,REL,ZAP70
HGF Signaling	0	0.00758	#NUM!	FOS
Type I Diabetes Mellitus Signaling	0	0.00393	#NUM!	NFKBIA,REL
G Protein Signaling Mediated by Tubby	0	0.00214	#NUM!	SSTR3
Communication between Innate and Adaptive Immune Cells	0	0.00107	#NUM!	TLR2
Sphingosine-1-phosphate Signaling	0	0.00833	#NUM!	ADCY8
Systemic Lupus Erythematosus Signaling	0	0.000936	#NUM!	FOS
CDC42 Signaling	0	0.00521	#NUM!	FOS,MYL2,MYL3
AMPK Signaling	0	0.00826	#NUM!	ADRA2A,CHRNA4
Hereditary Breast Cancer Signaling	0	0.00704	#NUM!	PTEN
RAC Signaling	0	0.0073	#NUM!	REL
Phospholipase C Signaling	0	0.00535	#NUM!	ADCY8,HMOX1,MYL2,MYL3,REL,ZAP70
Altered T Cell and B Cell Signaling in Rheumatoid Arthritis	0	0.00319	#NUM!	CXCL13,REL,TLR2
Role of NFAT in Cardiac Hypertrophy	0	0.00446	#NUM!	ADCY8
NUR77 Signaling in T Lymphocytes	0	0.00195	#NUM!	NR4A1
PKCθ Signaling in T Lymphocytes	0	0.00717	#NUM!	FOS,NFKBIA,REL,ZAP70
OX40 Signaling Pathway	0	0.00418	#NUM!	NFKBIA,REL
NGF Signaling	0	0.00833	#NUM!	REL
Granulocyte Adhesion and Diapedesis	0	0.00529	#NUM!	CXCL13
Sperm Motility	0	0.00778	#NUM!	NPPA,ZAP70
TEC Kinase Signaling	0	0.00692	#NUM!	ACTC1,ACTG2,FOS,REL
Cardiac β-adrenergic Signaling	0	0.00556	#NUM!	ADCY8
B Cell Receptor Signaling	0	0.00472	#NUM!	NFKBIA,PTEN,REL
NF-κB Signaling	0	0.00525	#NUM!	NFKBIA,TLR2,ZAP70
T Cell Receptor Signaling	0	0.00649	0	FOS,NFKBIA,REL,ZAP70
Phagosome Maturation	0	0.00633	#NUM!	STX1A
Th17 Activation Pathway	0	0.00207	#NUM!	REL
Endocannabinoid Neuronal Synapse Pathway	0	0.00671	#NUM!	ADCY8
Endocannabinoid Developing Neuron Pathway	0	0.00787	#NUM!	ADCY8
T Cell Exhaustion Signaling Pathway	0	0.00353	#NUM!	FOS,ZAP70
Systemic Lupus Erythematosus In T Cell Signaling Pathway	0	0.00156	#NUM!	FOS
Systemic Lupus Erythematosus In B Cell Signaling Pathway	0	0.00414	#NUM!	FOS,IFIT3,REL
Inhibition of ARE-Mediated mRNA Degradation Pathway	0	0.00617	#NUM!	POMC

## Sheet: WT+PSU vs. HIV+PSU
WT+PSU vs. HIV+PSU
© 2000-2023 QIAGEN. All rights reserved.
Ingenuity Canonical Pathways	-log(p-value)	Ratio	z-score	Molecules
Dilated Cardiomyopathy Signaling Pathway	10.6	0.0867	2.111	ACTC1,ADCY1,BCL2,CACNA2D1,CACNG4,MYBPC3,MYH3,MYH6,MYL2,MYL3,PRKCE,TNNC1,TNNT2
Calcium Signaling	7.53	0.0545	-2.449	ACTC1,CACNA2D1,CACNG4,CHRNB2,GRIA1,GRIN2A,MYH3,MYH6,MYL2,MYL3,TNNC1,TNNT2
Oxytocin Signaling Pathway	6.36	0.0426	-2.309	CACNA2D1,CACNG4,GNA11,GNA13,HSPB7,MYH3,MYH6,MYL2,MYL3,OXT,PRKCE,SHC3
Cellular Effects of Sildenafil (Viagra)	6.12	0.06	#NUM!	ACTC1,ADCY1,CACNA2D1,CACNG4,MYH3,MYH6,MYL2,MYL3,PDE4B
Estrogen Receptor Signaling	5.43	0.0318	-3.317	ADCY1,BCL2,CACNA2D1,CACNG4,GNA11,GNA13,MMP19,MYL2,MYL3,PGR,PRKCE,SETD7,SHC3
GABA Receptor Signaling	4.53	0.053	#NUM!	ADCY1,CACNA2D1,CACNG4,GABRG3,GNA11,GNA13,SLC6A11
SNARE Signaling Pathway	4.44	0.0515	-1.89	ADCY1,CACNA2D1,MYH3,MYH6,MYL2,MYL3,SYT13
Hepatic Fibrosis / Hepatic Stellate Cell Activation	4.31	0.0412	#NUM!	BCL2,CCR5,COL6A5,IGFBP5,MYH3,MYH6,MYL2,MYL3
Amyotrophic Lateral Sclerosis Signaling	3.89	0.0517	-1	BCL2,CACNA2D1,CACNG4,GRIA1,GRIN2A,NOS1
GPCR-Mediated Nutrient Sensing in Enteroendocrine Cells	3.85	0.0508	-2.449	ADCY1,CACNA2D1,CACNG4,GNA11,PRKCE,RAPGEF4
G Beta Gamma Signaling	3.64	0.0465	-1.633	ADCY1,CACNA2D1,CACNG4,GNA11,GNA13,PRKCE
Synaptic Long Term Depression	3.43	0.0354	-2.646	CACNA2D1,CACNG4,GNA11,GNA13,GRIA1,NOS1,PRKCE
Circadian Rhythm Signaling	3.35	0.0299	#NUM!	ADCY1,CACNA2D1,CACNG4,GNA11,GRIA1,GRIN2A,NOS1,PRKCE
Endocannabinoid Neuronal Synapse Pathway	3.31	0.0403	-1.633	ADCY1,CACNA2D1,CACNG4,GNA11,GRIA1,GRIN2A
Agranulocyte Adhesion and Diapedesis	3.28	0.0333	#NUM!	ACTC1,CCR5,MMP19,MYH3,MYH6,MYL2,MYL3
Opioid Signaling Pathway	3.23	0.0286	-2.236	ADCY1,CACNA2D1,CACNG4,GNA11,GNA13,GRIN2A,NOS1,PRKCE
RHOGDI Signaling	3.16	0.0318	#NUM!	ACTC1,GNA11,GNA13,MYH3,MYH6,MYL2,MYL3
CREB Signaling in Neurons	3.11	0.0198	-3	ADCY1,CACNA2D1,CACNG4,CCR5,GNA11,GNA13,GPR101,GRIA1,GRIN2A,PRKCE,SHC3,TACR3
G-Protein Coupled Receptor Signaling	3.06	0.0185	-3.051	ADCY1,CCR5,GNA11,GNA13,GPR101,MYL2,MYL3,PDE4B,PREX1,PRKCE,RAPGEF4,SHC3,TACR3
CXCR4 Signaling	3.03	0.0357	-1.342	ADCY1,GNA11,GNA13,MYL2,MYL3,PRKCE
Tight Junction Signaling	2.89	0.0335	#NUM!	ACTC1,MAGI2,MYH3,MYH6,MYL2,MYL3
Cardiac β-adrenergic Signaling	2.88	0.0333	#NUM!	ADCY1,CACNA2D1,CACNG4,GNA11,GNA13,PDE4B
Dopamine-DARPP32 Feedback in cAMP Signaling	2.81	0.0323	-2	ADCY1,CACNA2D1,CACNG4,GRIN2A,NOS1,PRKCE
Gαs Signaling	2.81	0.0397	#NUM!	ADCY1,ADD2,GNA11,GNA13,RAPGEF4
Oxytocin In Spinal Neurons Signaling Pathway	2.79	0.0857	#NUM!	GNA11,NOS1,OXT
Cardiac Hypertrophy Signaling	2.73	0.0268	-2	ADCY1,CACNA2D1,CACNG4,GNA11,GNA13,MYL2,MYL3
Synaptic Long Term Potentiation	2.72	0.0379	-2.236	ADCY1,GNA11,GRIA1,GRIN2A,PRKCE
Endothelin-1 Signaling	2.71	0.0309	-1.633	ADCY1,GNA11,GNA13,NOS1,PRKCE,SHC3
Insulin Secretion Signaling Pathway	2.63	0.0257	-2.236	ADCY1,CACNA2D1,CACNG4,GNA11,PRKCE,RAPGEF4,SPCS3
IL-8 Signaling	2.54	0.0286	-2	BCL2,GNA11,GNA13,MYL2,PRKCE,RAB11FIP2
Corticotropin Releasing Hormone Signaling	2.45	0.0329	-0.447	ADCY1,CACNA2D1,CACNG4,NOS1,PRKCE
nNOS Signaling in Neurons	2.42	0.0638	#NUM!	GRIN2A,NOS1,PRKCE
nNOS Signaling in Skeletal Muscle Cells	2.4	0.0625	#NUM!	CACNA2D1,CACNG4,NOS1
Thrombin Signaling	2.4	0.0267	#NUM!	ADCY1,GNA11,GNA13,MYL2,MYL3,PRKCE
Apelin Cardiomyocyte Signaling Pathway	2.36	0.0404	-2	GNA11,MYL2,MYL3,PRKCE
Neurovascular Coupling Signaling Pathway	2.33	0.0259	-0.816	CACNA2D1,CACNG4,GABRG3,GRIA1,GRIN2A,NOS1
Synaptogenesis Signaling Pathway	2.28	0.0222	-2.449	ADCY1,CACNA2D1,GRIA1,GRIN2A,PRKCE,SHC3,SYT13
Neuroinflammation Signaling Pathway	2.27	0.0221	-1.342	BCL2,CD200R1,GABRG3,GRIA1,GRIN2A,IRF7,SLC6A11
Androgen Signaling	2.26	0.0296	#NUM!	CACNA2D1,CACNG4,GNA11,GNA13,PRKCE
Actin Cytoskeleton Signaling	2.23	0.0246	-1.633	ACTC1,GNA13,MYH3,MYH6,MYL2,MYL3
α-Adrenergic Signaling	2.21	0.0367	#NUM!	ADCY1,GNA11,GNA13,PRKCE
Signaling by Rho Family GTPases	2.04	0.0225	-2	ACTC1,GNA11,GNA13,MYL2,MYL3,WASF3
GNRH Signaling	2.04	0.0262	#NUM!	ADCY1,CACNA2D1,CACNG4,GNA11,PRKCE
RHOA Signaling	2.02	0.0323	-2	ACTC1,GNA13,MYL2,MYL3
Gap Junction Signaling	1.97	0.0253	#NUM!	ACTC1,ADCY1,GJC3,GRIA1,PRKCE
Oxytocin In Brain Signaling Pathway	1.97	0.0251	-1.342	CACNA2D1,CACNG4,GNA11,OXT,PRKCE
Adrenomedullin signaling pathway	1.97	0.0251	-0.447	ADCY1,BCL2,CEBPB,GNA11,SHC3
ILK Signaling	1.95	0.0249	-1.342	ACTC1,MYH3,MYH6,MYL2,MYL3
GPCR-Mediated Integration of Enteroendocrine Signaling Exemplified by an L Cell	1.86	0.04	#NUM!	ADCY1,GAL,GNA11
White Adipose Tissue Browning Pathway	1.86	0.029	-1	ADCY1,CACNA2D1,CACNG4,CEBPB
Gαi Signaling	1.84	0.0286	#NUM!	ADCY1,GNA11,GNA13,SHC3
Apelin Endothelial Signaling Pathway	1.83	0.0284	-1	ADCY1,GNA11,GNA13,PRKCE
VDR/RXR Activation	1.82	0.0385	#NUM!	CEBPB,IGFBP5,PRKCE
Role of NFAT in Cardiac Hypertrophy	1.76	0.0223	-2	ADCY1,CACNA2D1,CACNG4,PRKCE,SHC3
Type II Diabetes Mellitus Signaling	1.71	0.0261	#NUM!	CACNA2D1,CACNG4,CEBPB,PRKCE
Relaxin Signaling	1.7	0.0258	#NUM!	ADCY1,GNA11,GNA13,PDE4B
Protein Kinase A Signaling	1.69	0.017	-0.447	ADCY1,ADD2,GNA13,MYL2,MYL3,PDE4B,PRKCE
eNOS Signaling	1.69	0.0256	#NUM!	ADCY1,AQP7,CHRNB2,PRKCE
Axonal Guidance Signaling	1.68	0.0157	#NUM!	ADAM23,GNA11,GNA13,MYL2,MYL3,NTN4,PRKCE,SRGAP3
Pulmonary Fibrosis Idiopathic Signaling Pathway	1.66	0.0184	-0.447	ACTC1,BCL2,COL6A5,GNA13,MMP19,PLG
Unfolded protein response	1.65	0.0333	#NUM!	BCL2,CEBPB,DNAJC16
Coagulation System	1.64	0.0571	#NUM!	FGG,PLG
AMPK Signaling	1.64	0.0207	#NUM!	CHRNB2,CKM,GNA11,GNA13,PHLPP2
Hepatic Fibrosis Signaling Pathway	1.63	0.0165	-1.342	BCL2,CACNA2D1,CACNG4,CEBPB,MYL2,MYL3,PRKCE
IL-1 Signaling	1.58	0.0312	#NUM!	ADCY1,GNA11,GNA13
Death Receptor Signaling	1.58	0.0312	#NUM!	ACTC1,BCL2,HSPB7
Aldosterone Signaling in Epithelial Cells	1.55	0.0233	#NUM!	DNAJC16,HSPA13,HSPB7,PRKCE
Mitochondrial Dysfunction	1.55	0.0174	1.633	BCL2,CACNA2D1,CACNG4,COX6A2,Cox8b,NOS1
Sperm Motility	1.54	0.0195	#NUM!	GNA11,GNA13,MERTK,PDE4B,PRKCE
Cardiac Hypertrophy Signaling (Enhanced)	1.54	0.0148	-2.449	ADCY1,CACNA2D1,CACNG4,GNA11,GNA13,HSPB7,PDE4B,PRKCE
Neuropathic Pain Signaling In Dorsal Horn Neurons	1.52	0.0297	#NUM!	GRIA1,GRIN2A,PRKCE
Mechanisms of Viral Exit from Host Cells	1.52	0.0488	#NUM!	ACTC1,PRKCE
Creatine-phosphate Biosynthesis	1.48	0.2	#NUM!	CKM
Citrulline-Nitric Oxide Cycle	1.48	0.2	#NUM!	NOS1
S100 Family Signaling Pathway	1.47	0.013	-2.53	BCL2,CACNA2D1,CACNG4,CCR5,GNA11,GPR101,MMP19,PLG,PRKCE,TACR3
Protein Ubiquitination Pathway	1.44	0.0183	#NUM!	DNAJC16,HSPA13,HSPB7,UBR1,USP22
Rapoport-Luebering Glycolytic Shunt	1.41	0.167	#NUM!	PGAM2
Leukocyte Extravasation Signaling	1.4	0.0207	-2	ACTC1,MMP19,PRKCE,RAPGEF4
Apelin Muscle Signaling Pathway	1.39	0.0417	#NUM!	GNA11,GNA13
Regulation of Actin-based Motility by Rho	1.38	0.0261	#NUM!	ACTC1,MYL2,MYL3
Role of Tissue Factor in Cancer	1.37	0.0259	#NUM!	FGG,GNA11,GNA13
Phagosome Formation	1.37	0.0129	-2.333	CCR5,GPR101,MYH3,MYH6,MYL2,MYL3,PRKCE,RAPGEF4,TACR3
Amyloid Processing	1.34	0.0392	#NUM!	CDK5R1,PRKCE
Nitric Oxide Signaling in the Cardiovascular System	1.34	0.025	#NUM!	CACNA2D1,CACNG4,PRKCE
Gustation Pathway	1.33	0.0197	-2	ADCY1,CACNA2D1,CACNG4,GABRG3
Renin-Angiotensin Signaling	1.33	0.0248	#NUM!	ADCY1,PRKCE,SHC3
GP6 Signaling Pathway	1.28	0.0236	#NUM!	COL6A5,FGG,PRKCE
Role Of Osteoclasts In Rheumatoid Arthritis Signaling Pathway	1.25	0.0162	-1	ADAM23,BCL2,COL6A5,MMP19,SHC3
fMLP Signaling in Neutrophils	1.24	0.0229	#NUM!	GNA11,GNA13,PRKCE
Pathogenesis of Multiple Sclerosis	1.23	0.111	#NUM!	CCR5
Gα12/13 Signaling	1.23	0.0226	#NUM!	GNA13,MYL2,MYL3
CCR3 Signaling in Eosinophils	1.22	0.0224	#NUM!	GNA11,GNA13,PRKCE
EIF2 Signaling	1.18	0.0176	#NUM!	ACTC1,BCL2,Rpl39l,RPL3L
HER-2 Signaling in Breast Cancer	1.18	0.0176	0	COX6A2,Cox8b,PGR,PRKCE
Glutamate Receptor Signaling	1.15	0.0303	#NUM!	GRIA1,GRIN2A
IL-12 Signaling and Production in Macrophages	1.14	0.0169	0	CCR5,CEBPB,PCYOX1,PRKCE
Endocannabinoid Cancer Inhibition Pathway	1.12	0.0204	#NUM!	ADCY1,GNA13,NOS1
Semaphorin Neuronal Repulsive Signaling Pathway	1.1	0.02	#NUM!	MYL2,MYL3,PDE4B
Molecular Mechanisms of Cancer	1.09	0.0133	#NUM!	ADCY1,BCL2,GNA11,GNA13,PRKCE,SHC3
Factors Promoting Cardiogenesis in Vertebrates	1.08	0.0196	#NUM!	MYH6,MYL2,PRKCE
Ephrin B Signaling	1.08	0.0278	#NUM!	GNA11,GNA13
Netrin Signaling	1.08	0.0278	#NUM!	CACNA2D1,CACNG4
Cholesterol Biosynthesis I	1.08	0.0769	#NUM!	DHCR24
Cholesterol Biosynthesis II (via 24,25-dihydrolanosterol)	1.08	0.0769	#NUM!	DHCR24
Cholesterol Biosynthesis III (via Desmosterol)	1.08	0.0769	#NUM!	DHCR24
Wound Healing Signaling Pathway	1.06	0.0159	1	CEBPB,COL6A5,KRT17,SHC3
NF-κB Activation by Viruses	1.02	0.0256	#NUM!	CCR5,PRKCE
Superpathway of Citrulline Metabolism	1.02	0.0667	#NUM!	NOS1
Maturity Onset Diabetes of Young (MODY) Signaling	1.01	0.0253	#NUM!	CACNA2D1,CACNG4
Dopamine Receptor Signaling	1	0.025	#NUM!	ADCY1,NCS1
Extrinsic Prothrombin Activation Pathway	0.996	0.0625	#NUM!	FGG
Chondroitin Sulfate Degradation (Metazoa)	0.996	0.0625	#NUM!	HYAL1
Chemokine Signaling	0.996	0.0247	#NUM!	CCR5,MYL2
Gαq Signaling	0.979	0.0176	#NUM!	GNA11,GNA13,PRKCE
Colorectal Cancer Metastasis Signaling	0.971	0.0148	#NUM!	ADCY1,GNA11,GNA13,MMP19
Dermatan Sulfate Degradation (Metazoa)	0.971	0.0588	#NUM!	HYAL1
CCR5 Signaling in Macrophages	0.932	0.012	#NUM!	CACNA2D1,CACNG4,CCR5,GNA11,GNA13,PRKCE
Huntington's Disease Signaling	0.917	0.0141	#NUM!	CDK5R1,GNA11,PRKCE,SHC3
Apelin Adipocyte Signaling Pathway	0.903	0.0217	#NUM!	ADCY1,GNA11
Acute Phase Response Signaling	0.9	0.0162	#NUM!	CEBPB,FGG,PLG
Fcγ Receptor-mediated Phagocytosis in Macrophages and Monocytes	0.886	0.0213	#NUM!	ACTC1,PRKCE
Prolactin Signaling	0.879	0.0211	#NUM!	CEBPB,PRKCE
Small Cell Lung Cancer Signaling	0.873	0.0208	#NUM!	BCL2,NOS1
TGF-β Signaling	0.873	0.0208	#NUM!	BCL2,IRF7
Melanocyte Development and Pigmentation Signaling	0.857	0.0204	#NUM!	ADCY1,BCL2
Senescence Pathway	0.857	0.0134	#NUM!	CACNA2D1,CACNG4,CEBPB,DHCR24
VEGF Signaling	0.851	0.0202	#NUM!	ACTC1,BCL2
Apoptosis Signaling	0.818	0.0192	#NUM!	BCL2,PRKCE
Ephrin Receptor Signaling	0.818	0.0149	#NUM!	GNA11,GNA13,GRIN2A
CDP-diacylglycerol Biosynthesis I	0.812	0.04	#NUM!	CDS2
Sertoli Cell-Sertoli Cell Junction Signaling	0.801	0.0146	#NUM!	ACTC1,MAGI2,NOS1
Clathrin-mediated Endocytosis Signaling	0.793	0.0144	#NUM!	ACTC1,PCYOX1,STON2
Cardiomyocyte Differentiation via BMP Receptors	0.783	0.037	#NUM!	MYL2
Phosphatidylglycerol Biosynthesis II (Non-plastidic)	0.783	0.037	#NUM!	CDS2
Glycolysis I	0.783	0.037	#NUM!	PGAM2
Gluconeogenesis I	0.783	0.037	#NUM!	PGAM2
Oxidative Phosphorylation	0.772	0.018	#NUM!	COX6A2,Cox8b
ERK/MAPK Signaling	0.762	0.014	#NUM!	HSPB7,PRKCE,RAPGEF4
Superpathway of Cholesterol Biosynthesis	0.754	0.0345	#NUM!	DHCR24
CDK5 Signaling	0.75	0.0174	#NUM!	ADCY1,CDK5R1
Neuregulin Signaling	0.738	0.0171	#NUM!	CDK5R1,PRKCE
PAK Signaling	0.738	0.0171	#NUM!	MYL2,MYL3
Virus Entry via Endocytic Pathways	0.733	0.0169	#NUM!	ACTC1,PRKCE
Cholecystokinin/Gastrin-mediated Signaling	0.726	0.0168	#NUM!	GNA13,PRKCE
Sphingosine-1-phosphate Signaling	0.721	0.0167	#NUM!	ADCY1,GNA13
Breast Cancer Regulation by Stathmin1	0.688	0.0101	-2.236	CCR5,GNA13,GPR101,PRKCE,SHC3,TACR3
cAMP-mediated signaling	0.682	0.0127	#NUM!	ADCY1,PDE4B,RAPGEF4
NRF2-mediated Oxidative Stress Response	0.678	0.0127	#NUM!	ACTC1,DNAJC16,PRKCE
IL-6 Signaling	0.674	0.0155	#NUM!	CEBPB,HSPB7
Interferon Signaling	0.67	0.0278	#NUM!	BCL2
P2Y Purigenic Receptor Signaling Pathway	0.654	0.015	#NUM!	ADCY1,PRKCE
Docosahexaenoic Acid (DHA) Signaling	0.65	0.0263	#NUM!	BCL2
IL-17A Signaling in Fibroblasts	0.65	0.0263	#NUM!	CEBPB
Notch Signaling	0.65	0.0263	#NUM!	MAML3
Inhibition of Matrix Metalloproteases	0.64	0.0256	#NUM!	MMP19
Pathogen Induced Cytokine Storm Signaling Pathway	0.631	0.0108	1	CCR5,COL6A5,FGG,IRF7
Reelin Signaling in Neurons	0.631	0.0145	#NUM!	CDK5R1,GRIN2A
Role Of Chondrocytes In Rheumatoid Arthritis Signaling Pathway	0.618	0.0142	#NUM!	CEBPB,MMP19
Intrinsic Prothrombin Activation Pathway	0.611	0.0238	#NUM!	FGG
Serotonin Receptor Signaling	0.585	0.0222	#NUM!	ADCY1
Role of RIG1-like Receptors in Antiviral Innate Immunity	0.577	0.0217	#NUM!	IRF7
tRNA Splicing	0.577	0.0217	#NUM!	PDE4B
DNA damage-induced 14-3-3σ Signaling	0.577	0.0217	#NUM!	BCL2
NAD Signaling Pathway	0.575	0.0132	#NUM!	CEBPB,OXT
PTEN Signaling	0.575	0.0132	#NUM!	BCL2,MAGI2
Dermatan Sulfate Biosynthesis (Late Stages)	0.57	0.0213	#NUM!	HS6ST3
IL-10 Signaling	0.564	0.013	#NUM!	BCL2,CCR5
Role of Pattern Recognition Receptors in Recognition of Bacteria and Viruses	0.556	0.0128	#NUM!	IRF7,PRKCE
MYC Mediated Apoptosis Signaling	0.547	0.02	#NUM!	BCL2
Chondroitin Sulfate Biosynthesis (Late Stages)	0.547	0.02	#NUM!	HS6ST3
UVC-Induced MAPK Signaling	0.539	0.0196	#NUM!	PRKCE
UVB-Induced MAPK Signaling	0.533	0.0192	#NUM!	PRKCE
MSP-RON Signaling Pathway	0.493	0.0172	#NUM!	ACTC1
Chondroitin Sulfate Biosynthesis	0.493	0.0172	#NUM!	HS6ST3
Erythropoietin Signaling Pathway	0.481	0.0113	#NUM!	PRKCE,SHC3
Dermatan Sulfate Biosynthesis	0.481	0.0167	#NUM!	HS6ST3
Tumor Microenvironment Pathway	0.476	0.0112	#NUM!	BCL2,MMP19
Role of JAK2 in Hormone-like Cytokine Signaling	0.47	0.0161	#NUM!	BCL2
Thrombopoietin Signaling	0.463	0.0159	#NUM!	PRKCE
Activation of IRF by Cytosolic Pattern Recognition Receptors	0.453	0.0154	#NUM!	IRF7
Induction of Apoptosis by HIV1	0.453	0.0154	#NUM!	BCL2
Pyridoxal 5'-phosphate Salvage Pathway	0.453	0.0154	#NUM!	PRKCE
Role of PI3K/AKT Signaling in the Pathogenesis of Influenza	0.447	0.0152	#NUM!	CCR5
Granulocyte Adhesion and Diapedesis	0.445	0.0106	#NUM!	CCR5,MMP19
Hepatic Cholestasis	0.44	0.0105	#NUM!	ADCY1,PRKCE
Production of Nitric Oxide and Reactive Oxygen Species in Macrophages	0.44	0.0105	#NUM!	PCYOX1,PRKCE
Xenobiotic Metabolism CAR Signaling Pathway	0.44	0.0105	#NUM!	HS6ST3,PRKCE
ERBB4 Signaling	0.438	0.0147	#NUM!	PRKCE
Remodeling of Epithelial Adherens Junctions	0.438	0.0147	#NUM!	ACTC1
Xenobiotic Metabolism PXR Signaling Pathway	0.437	0.0104	#NUM!	HS6ST3,PRKCE
Agrin Interactions at Neuromuscular Junction	0.433	0.0145	#NUM!	ACTC1
PPARα/RXRα Activation	0.428	0.0103	#NUM!	ADCY1,GNA11
Stearate Biosynthesis I (Animals)	0.427	0.0143	#NUM!	DHCR24
Growth Hormone Signaling	0.423	0.0141	#NUM!	PRKCE
Pulmonary Healing Signaling Pathway	0.418	0.0101	#NUM!	MMP19,PRKCE
Melatonin Signaling	0.418	0.0139	#NUM!	PRKCE
Glioma Invasiveness Signaling	0.413	0.0137	#NUM!	PLG
ID1 Signaling Pathway	0.412	0.00995	#NUM!	BCL2,CHRNB2
ERK5 Signaling	0.409	0.0135	#NUM!	GNA13
Caveolar-mediated Endocytosis Signaling	0.405	0.0133	#NUM!	ACTC1
Coronavirus Pathogenesis Pathway	0.405	0.0098	#NUM!	BCL2,IRF7
RAR Activation	0.401	0.00976	#NUM!	ADCY1,PRKCE
Leptin Signaling in Obesity	0.4	0.0132	#NUM!	ADCY1
GDNF Family Ligand-Receptor Interactions	0.4	0.0132	#NUM!	DOK6
Macropinocytosis Signaling	0.4	0.0132	#NUM!	PRKCE
Antiproliferative Role of Somatostatin Receptor 2	0.396	0.013	#NUM!	NOS1
HIF1α Signaling	0.395	0.00962	#NUM!	MMP19,PRKCE
IL-7 Signaling Pathway	0.391	0.0128	#NUM!	BCL2
IL-3 Signaling	0.387	0.0127	#NUM!	PRKCE
Integrin Signaling	0.384	0.00943	#NUM!	ACTC1,MYL2
Heparan Sulfate Biosynthesis (Late Stages)	0.379	0.0123	#NUM!	HS6ST3
JAK/STAT Signaling	0.375	0.0122	#NUM!	CEBPB
BEX2 Signaling Pathway	0.375	0.0122	#NUM!	BCL2
Role of MAPK Signaling in the Pathogenesis of Influenza	0.367	0.0119	#NUM!	BCL2
VEGF Family Ligand-Receptor Interactions	0.367	0.0119	#NUM!	PRKCE
PEDF Signaling	0.367	0.0119	#NUM!	BCL2
LPS-stimulated MAPK Signaling	0.363	0.0118	#NUM!	PRKCE
Role of Hypercytokinemia/hyperchemokinemia in the Pathogenesis of Influenza	0.36	0.0116	#NUM!	IRF7
Heparan Sulfate Biosynthesis	0.352	0.0114	#NUM!	HS6ST3
Immunogenic Cell Death Signaling Pathway	0.345	0.0111	#NUM!	BCL2
Ceramide Signaling	0.341	0.011	#NUM!	BCL2
Crosstalk between Dendritic Cells and Natural Killer Cells	0.341	0.011	#NUM!	ACTC1
ERBB Signaling	0.334	0.0108	#NUM!	PRKCE
Salvage Pathways of Pyrimidine Ribonucleotides	0.321	0.0103	#NUM!	PRKCE
p53 Signaling	0.318	0.0102	#NUM!	BCL2
Role Of Osteoblasts In Rheumatoid Arthritis Signaling Pathway	0.315	0.0082	#NUM!	BCL2,MMP19
IGF-1 Signaling	0.297	0.00952	#NUM!	IGFBP5
Paxillin Signaling	0.292	0.00935	#NUM!	ACTC1
Neutrophil Extracellular Trap Signaling Pathway	0.284	0.00726	#NUM!	CCR5,COL6A5,PRKCE
Kinetochore Metaphase Signaling Pathway	0.281	0.00901	#NUM!	BUB1B
DNA Methylation and Transcriptional Repression Signaling	0.278	0.00893	#NUM!	CEBPB
Prostate Cancer Signaling	0.272	0.00877	#NUM!	BCL2
Role of MAPK Signaling in Promoting the Pathogenesis of Influenza	0.272	0.00877	#NUM!	BCL2
TEC Kinase Signaling	0.269	0.00692	#NUM!	ACTC1,GNA11,GNA13,PRKCE
Bladder Cancer Signaling	0.268	0.00862	#NUM!	MMP19
Glucocorticoid Receptor Signaling	0.264	0.00687	#NUM!	BCL2,FGG,KRT17,PGR
Fc Epsilon RI Signaling	0.263	0.00847	#NUM!	PRKCE
Airway Pathology in Chronic Obstructive Pulmonary Disease	0.263	0.00847	#NUM!	LCN12
NGF Signaling	0.258	0.00833	#NUM!	SHC3
p38 MAPK Signaling	0.258	0.00833	#NUM!	HSPB7
Neuroprotective Role of THOP1 in Alzheimer's Disease	0.256	0.00826	#NUM!	PLG
Th1 Pathway	0.253	0.0082	#NUM!	CCR5
LXR/RXR Activation	0.251	0.00813	#NUM!	PCYOX1
IL-15 Production	0.251	0.00813	#NUM!	MERTK
Glioma Signaling	0.246	0.008	#NUM!	PRKCE
FXR/RXR Activation	0.244	0.00794	#NUM!	PCYOX1
Pancreatic Adenocarcinoma Signaling	0.244	0.00794	#NUM!	BCL2
14-3-3-mediated Signaling	0.242	0.00787	#NUM!	PRKCE
Endocannabinoid Developing Neuron Pathway	0.242	0.00787	#NUM!	ADCY1
Xenobiotic Metabolism Signaling	0.237	0.00687	#NUM!	HS6ST3,PRKCE
HGF Signaling	0.231	0.00758	#NUM!	PRKCE
Atherosclerosis Signaling	0.23	0.00752	#NUM!	PCYOX1
STAT3 Pathway	0.225	0.00741	#NUM!	BCL2
RAC Signaling	0.222	0.0073	#NUM!	CDK5R1
Th2 Pathway	0.222	0.0073	#NUM!	CCR5
Adipogenesis pathway	0.218	0.00719	#NUM!	CEBPB
Xenobiotic Metabolism General Signaling Pathway	0.21	0.00699	#NUM!	PRKCE
CLEAR Signaling Pathway	0	0.00351	#NUM!	PRKCE
Macrophage Classical Activation Signaling Pathway	0	0.00529	#NUM!	MERTK
Multiple Sclerosis Signaling Pathway	0	0.0045	#NUM!	GRIN2A
Ribonucleotide Reductase Signaling Pathway	0	0.00588	#NUM!	BCL2
Macrophage Alternative Activation Signaling Pathway	0	0.00495	#NUM!	CEBPB
Chaperone Mediated Autophagy Signaling Pathway	0	0.00156	#NUM!	MMP19
NOD1/2 Signaling Pathway	0	0.00529	#NUM!	IRF7
Aryl Hydrocarbon Receptor Signaling	0	0.00629	#NUM!	HSPB7
LPS/IL-1 Mediated Inhibition of RXR Function	0	0.00394	#NUM!	HS6ST3
Role of NFAT in Regulation of the Immune Response	0	0.00193	#NUM!	GNA11,GNA13
FcγRIIB Signaling in B Lymphocytes	0	0.00375	#NUM!	CACNA2D1,CACNG4
Calcium-induced T Lymphocyte Apoptosis	0	0.00217	#NUM!	PRKCE
Cytotoxic T Lymphocyte-mediated Apoptosis of Target Cells	0	0.00235	#NUM!	BCL2
IL-17 Signaling	0	0.00535	#NUM!	CEBPB
Human Embryonic Stem Cell Pluripotency	0	0.00498	#NUM!	PRKCE
Germ Cell-Sertoli Cell Junction Signaling	0	0.00588	#NUM!	ACTC1
Type I Diabetes Mellitus Signaling	0	0.00196	#NUM!	BCL2
Chronic Myeloid Leukemia Signaling	0	0.0036	#NUM!	BCL2
p70S6K Signaling	0	0.00172	#NUM!	PRKCE
mTOR Signaling	0	0.00467	#NUM!	PRKCE
G Protein Signaling Mediated by Tubby	0	0.00641	#NUM!	GNA11,GNA13,MERTK
CDC42 Signaling	0	0.00521	#NUM!	EXOC8,MYL2,MYL3
FAK Signaling	0	0.00288	#NUM!	CCR5,GPR101,TACR3
Role of Osteoblasts, Osteoclasts and Chondrocytes in Rheumatoid Arthritis	0	0.00439	#NUM!	BCL2
Phospholipase C Signaling	0	0.00446	-2	ADCY1,GNA13,MYL2,MYL3,PRKCE
Ovarian Cancer Signaling	0	0.00633	#NUM!	BCL2
Role of Macrophages, Fibroblasts and Endothelial Cells in Rheumatoid Arthritis	0	0.00602	#NUM!	CEBPB,PRKCE
Glioblastoma Multiforme Signaling	0	0.00585	#NUM!	SHC3
NUR77 Signaling in T Lymphocytes	0	0.0039	#NUM!	BCL2,PRKCE
PKCθ Signaling in T Lymphocytes	0	0.00358	#NUM!	CACNA2D1,CACNG4
OX40 Signaling Pathway	0	0.00209	#NUM!	BCL2
D-myo-inositol-5-phosphate Metabolism	0	0.00513	#NUM!	MTMR9
D-myo-inositol (1,4,5,6)-Tetrakisphosphate Biosynthesis	0	0.00559	#NUM!	MTMR9
Superpathway of Inositol Phosphate Compounds	0	0.00427	#NUM!	MTMR9
D-myo-inositol (3,4,5,6)-tetrakisphosphate Biosynthesis	0	0.00559	#NUM!	MTMR9
3-phosphoinositide Degradation	0	0.00524	#NUM!	MTMR9
3-phosphoinositide Biosynthesis	0	0.00488	#NUM!	MTMR9
Epithelial Adherens Junction Signaling	0	0.00637	#NUM!	MAGI2
SAPK/JNK Signaling	0	0.00199	#NUM!	GNA13
PI3K/AKT Signaling	0	0.005	#NUM!	BCL2
IL-4 Signaling	0	0.00173	#NUM!	COL6A5
T Cell Receptor Signaling	0	0.00162	#NUM!	SHC3
Phagosome Maturation	0	0.00633	#NUM!	NOS1
Autophagy	0	0.00463	#NUM!	BCL2
Th1 and Th2 Activation Pathway	0	0.00581	#NUM!	CCR5
Osteoarthritis Pathway	0	0.00424	#NUM!	CEBPB
Sirtuin Signaling Pathway	0	0.00341	#NUM!	PGAM2
T Cell Exhaustion Signaling Pathway	0	0.00176	#NUM!	MGAT5
Systemic Lupus Erythematosus In T Cell Signaling Pathway	0	0.00311	#NUM!	GNA13,NOS1
Systemic Lupus Erythematosus In B Cell Signaling Pathway	0	0.00552	-1	BCL2,IRF7,PRKCE,SHC3
HOTAIR Regulatory Pathway	0	0.00613	#NUM!	MMP19
Necroptosis Signaling Pathway	0	0.00641	#NUM!	MERTK
Regulation Of The Epithelial Mesenchymal Transition By Growth Factors Pathway	0	0.00521	#NUM!	SHC3
